# Supplementary material for: Drug contraindications in comorbid diseases: a protein interactome perspective
Source: Springer Nature journal article supplement (doi:10.1007/s13721-023-00440-3), 2024-03-19
Supplement: MOESM1 [file 26880324]

## Supplementary Data Files

Drug Contraindications in Comorbid Diseases: a Protein Interactome Perspective

**Authors:**

Kalyani B. Karunakaran1,2*, Madhavi K. Ganapathiraju3,4*, Sanjeev Jain5,
Samir K. Brahmachari6 and N. Balakrishnan1*

**Affiliations:**

1Supercomputer Education and Research Centre, Indian Institute of Science, Bangalore, India

2Institute for the Advanced Study of Human Biology, Kyoto University, Kyoto, Japan

3Carnegie Mellon University, Doha, Qatar

4Department of Biomedical Informatics, School of Medicine, University of Pittsburgh, Pittsburgh, PA, USA

5National Institute of Mental Health and Neuro-Sciences (NIMHANS), Bangalore, India

6Academy of Scientific and Innovative Research, CSIR-4PI, Bangalore, India

***Correspondence to:** Kalyani B. Karunakaran ([kalyanithepebble@gmail.com](mailto:kalyanithepebble@gmail.com)), Madhavi K. Ganapathiraju ([madhavi@pitt.edu](file:///D:\Users\ekaru\Documents\NBK-2020-2022-5\Drug%20contraindications%20in%20comorbidities\Results\Internal%20Revision\NetMAHIB\madhavi@pitt.edu)) and N. Balakrishnan ([balki@iisc.ac.in](mailto:balki@iisc.ac.in))

The manuscript is submitted to Network Modeling Analysis in Health Informatics and Bioinformatics.

This file contains:

- Supplementary Data Files 1 to 4

**Supplementary Data File 1:** Genes associated with each of the diseases compiled from the DisGeNET database

| **Anxiety** | **Depression** |
| --- | --- |
| SLC6A4 | CRH |
| COMT | CRHR1 |
| DRD2 | DRD2 |
| FMR1 | NR3C1 |
| BDNF | HTR2A |
| LINC02210-CRHR1 | IL1B |
| SNCA | IL6 |
| HTR2A | NPY |
| MECP2 | NTRK2 |
| GTF2I | BDNF |
| DAO | S100A10 |
| GABRG2 | S100B |
| GRN | SLC6A2 |
| COX2 | SLC6A4 |
| PINK1 | TPH1 |
| SOD1 | GSK3B |
| TP53 | NGF |
| PDE10A | CHRM2 |
| PARK7 | ADRA2A |
| LRRK2 | DBH |
| CYP17A1 | DRD1 |
| C9orf72 | CRHBP |
| ERBB4 | CRHR2 |
| TARDBP | IL6R |
| NIPBL | PPP1R1B |
| GNAS | HDAC5 |
| GNRHR | PDE4D |
| LAMA1 | TH |
| HSPG2 | TPH2 |
| HCN1 | CNR1 |
| MEN1 | COMT |
| ND6 | CREB1 |
| TLR9 | CYP2D6 |
| AHI1 | DRD4 |
| PSEN1 | ESR1 |
| TACR3 | FKBP5 |
| XK | GAD1 |
| EHMT1 | DISC1 |
| KISS1R | GRIN2B |
| SGCE | HCRT |
| TMEM161B-AS1 | HTR1A |
| RNF103-CHMP3 | HTR2C |
| STIMATE-MUSTN1 | IFNG |
| BORCS7-ASMT | IGF1 |
| USH1C | IDO1 |
| PQBP1 | AR |
| OPTN | KCNK2 |
| LINC01876 | LEP |
| STUB1 | MAOA |
| BAIAP2 | NR3C2 |
| CIB2 | MTHFR |
| DEAF1 | OPRK1 |
| LINC02503 | OXTR |
| STAG2 | P2RX7 |
| RAI1 | GAL |
| PPARGC1A | ABCB1 |
| SLC38A3 | POMC |
| TLK2 | PTGS2 |
| ADCY5 | SLC6A3 |
| KPTN | TAC1 |
| NISCH | TNF |
| POLG2 | VEGFA |
| PRRT2 | ARTN |
| STX1B | IL1A |
| TWF2 | IL18 |
| CLCN4 | REN |
| CLN3 | CLOCK |
| TPH2 | GRIA1 |
| USH1G | CXCL8 |
| CNR1 | CYP2C19 |
| PROKR2 | DRD3 |
| CPOX | PCLO |
| SGCZ | COX2 |
| CRH | CACNA1C |
| CRHR1 | BICC1 |
| CRP | GFAP |
| NAGS | HP |
| DENND1B | HTR1B |
| DCTN1 | ARNTL |
| DNMT3A | PDE4A |
| DSCAM | SLC18A2 |
| DUSP6 | TNFRSF1A |
| TOR1A | CNR2 |
| ARID2 | AKT1 |
| ELN | HTR3A |
| ARHGAP27 | MAOB |
| TSNARE1 | NOS2 |
| EPHA4 | NOS3 |
| ESR1 | PDE4B |
| ACSL4 | MAPK3 |
| BPTF | BRCA1 |
| JMJD1C | FTO |
| FGF8 | PER2 |
| FGFR1 | CHRNA4 |
| FKBP5 | GNB3 |
| ARSG | TNFRSF1B |
| FAN1 | TRH |
| NT5C2 | VGF |
| UNC13A | HOMER1 |
| IQSEC2 | CARTPT |

| **Parkinson's disease** | **Schizophrenia** |
| --- | --- |
| SNCA | AKT1 |
| PARK7 | MAGI2 |
| DDC | CHRNA7 |
| DRD2 | GRIN2B |
| ATP13A2 | HTR2A |
| MAOB | NOS1 |
| PRKN | RELN |
| PINK1 | SRR |
| SLC18A2 | CSMD1 |
| TH | TCF4 |
| DRD1 | SHANK3 |
| IGF1R | NRXN1 |
| LRRK2 | RTN4R |
| GAK | SP4 |
| GBA | SETD1A |
| MAPT | PPP3R1 |
| BST1 | SYNGAP1 |
| HLA-DRA | MDK |
| PARK16 | NRG3 |
| DNM1L | CNR1 |
| PPARGC1A | DISC1 |
| CP | GRM5 |
| CYP2D6 | GSK3B |
| GDNF | ZDHHC8 |
| GFAP | APOE |
| TMEM230 | NR4A2 |
| GSTM1 | SLC6A3 |
| HFE | DTNBP1 |
| HMOX1 | PPP1R1B |
| HSPA9 | KMO |
| IL6 | CPLX2 |
| MAOA | BACE1 |
| MTHFR | MBP |
| NOS1 | TAAR1 |
| ABCB1 | MAP6 |
| VPS35 | PTGS2 |
| BDNF | PLCB1 |
| SLC6A3 | LRRTM1 |
| SOD1 | MAP2K7 |
| SOD2 | NLGN2 |
| TNF | SLC6A1 |
| GSTP1 | YWHAH |
| DDIT4 | MTOR |
| CYP2E1 | AVPR1A |
| MAP3K5 | ZIC2 |
| NGF | GNAS |
| NQO1 | BECN1 |
| AIF1 | CHI3L1 |
| GSTA4 | COMT |
| IGF2 | DRD3 |
| TRPM2 | BRD1 |
| HLA-DRB5 | DAOA |
| IGF2R | DISC2 |
| INS | ANK3 |
| ENO2 | GRIA1 |
| FBP1 | GRM3 |
| FCER2 | NRG1 |
| GPX1 | HLA-DRB1 |
| HGF | MTHFR |
| HSPA1A | NCAM1 |
| INSR | NOTCH4 |
| MIR181C | NRGN |
| MAG | PDE4B |
| MTA1 | ABCB1 |
| BAG5 | PRODH |
| TCL1B | SLC1A1 |
| ADARB2 | TBX1 |
| COL19A1 | CACNA1C |
| SLC2A14 | ZNF804A |
| EDN1 | FOXP2 |
| FGB | FEZ1 |
| CNTNAP2 | NOS1AP |
| GSK3B | SRGAP3 |
| HBG1 | SYN2 |
| HSPA4 | MED12 |
| HSPA8 | CHRNA5 |
| IL1B | HLA-DQB1 |
| DRAXIN | VRK2 |
| KCNJ4 | HLA-A |
| MAP2 | NDE1 |
| CEACAM6 | DLG2 |
| NR4A2 | GABBR1 |
| PITX3 | MIR137HG |
| NCAPG2 | ARVCF |
| SLC30A10 | TCF7L2 |
| NECTIN2 | FYN |
| RPL6 | CNNM2 |
| RPL23A | YWHAE |
| RPS8 | TSPAN18 |
| TALDO1 | TSNARE1 |
| TFAM | MPC2 |
| RPL14 | ITIH3 |
| OPTN | NTRK3 |
| SPR | PBRM1 |
| TWNK | MAD1L1 |
| ATG7 | DCC |
| GRK5 | ESR2 |
| HTR1A | NKAPL |
| PENK | HLA-B |
| GDF5 | MSRA |

| **Asthma** | **Hypertension** |
| --- | --- |
| TBX21 | PTGIS |
| IL5 | NOS3 |
| IL13 | AGT |
| CCL11 | AGTR1 |
| TGFB1 | GNB3 |
| ICAM1 | ADD1 |
| IL4 | NOS2 |
| IL6 | RGS5 |
| MMP9 | ATP1B1 |
| NOS2 | ECE1 |
| CCL2 | CALY |
| CCL5 | CYP3A5 |
| SCGB3A2 | GATA5 |
| ADRB2 | UMOD |
| ALOX5 | SLC12A3 |
| HLA-DQB1 | MTHFR |
| HLA-DRB1 | ADRB1 |
| HLA-G | ACE2 |
| GSDMB | WNK4 |
| TNF | ACE |
| TSLP | HSD11B2 |
| IL33 | EDN1 |
| IL1RL1 | REN |
| ORMDL3 | CYP11B2 |
| HLA-DQA1 | PGR-AS1 |
| IL6R | ADRB2 |
| RAD50 | GRK4 |
| PDE4D | TNF |
| IKZF3 | KNG1 |
| HNMT | LEP |
| CDHR3 | ATM |
| KIF3A | IL6 |
| PYHIN1 | SLC33A1 |
| MUC7 | NR3C2 |
| PLA2G7 | CHGA |
| DNAH5 | ALDH2 |
| TNIP1 | ADIPOQ |
| WDR36 | RNU1-4 |
| PTGDR2 | INSR |
| CCR3 | NEDD4L |
| PARP1 | CLCNKB |
| EDN1 | APOE |
| GATA3 | STK39 |
| GSTM1 | LPL |
| GSTP1 | TGFB1 |
| HLA-DPB1 | KLK1 |
| TNC | ALB |
| IL1B | ADRB3 |
| IL1RN | SYNE1 |
| IL2RA | CYP4A11 |
| IL4R | APLN |
| ARG1 | CRP |
| NPSR1 | ATP2B1 |
| RNASE3 | VEGFA |
| STAT6 | AGTR2 |
| VEGFA | SELE |
| CAT | CYP2J2 |
| CD14 | BDKRB2 |
| ARG2 | ERAP1 |
| AREG | NPR3 |
| NQO1 | SERPINE1 |
| MMP1 | LEPR |
| ALDH2 | CYP2C9 |
| CTNNA3 | SPP1 |
| SOD1 | PPARG |
| BCL2 | CCHCR1 |
| RUNX3 | GSTK1 |
| HMOX1 | SLCO6A1 |
| PLAU | ADM |
| TRPA1 | SELENBP1 |
| IFNL3 | MFN2 |
| NPY | GCGR |
| PTEN | HCCAT5 |
| MMP10 | HMOX1 |
| ADCY2 | WNK1 |
| ADCYAP1R1 | SHBG |
| MYB | HSPA4 |
| BGLAP | TRPC3 |
| SPRR2B | EDNRA |
| TIMP3 | SLC7A1 |
| CCL26 | TSC1 |
| DNMT1 | TNFRSF1B |
| EGFR | VDR |
| NR3C1 | TH |
| HSD11B2 | HLA-DRB1 |
| IL10 | HPGDS |
| IL17A | HP |
| KRT19 | LPA |
| MUC5AC | CYBA |
| SERPINE1 | EMILIN1 |
| IL22 | TESC |
| PDE4B | KCNJ11 |
| SERPINA1 | RGS2 |
| PPP2CA | UTS2 |
| PTGS2 | NPR1 |
| DPP10 | CYP2D6 |
| CCL17 | POMC |
| SCGB1A1 | AGER |
| CXCL14 | DRD1 |
| AGER | GSTT1 |

| **Type 2 diabetes** | **Obesity** |
| --- | --- |
| HNF4A | MC4R |
| PAX4 | PPARG |
| PPP1R3A | POMC |
| AKT2 | CPE |
| GCK | AGRP |
| IRS1 | SH2B1 |
| KCNJ11 | LEP |
| HNF1A | LEPR |
| NEUROD1 | PCSK1 |
| SLC2A4 | ENPP1 |
| HNF1B | SIM1 |
| ADCY5 | UCP3 |
| CAPN10 | NR0B2 |
| HMGA1 | BBS4 |
| INS | MKKS |
| INSR | BBS1 |
| PDX1 | CNR1 |
| ENPP1 | CRP |
| PPARG | ESR1 |
| CDKAL1 | SIRT3 |
| SLC2A2 | SIRT1 |
| ABCC8 | HSD11B1 |
| TCF7L2 | IL6 |
| TGFB1 | IRS1 |
| WFS1 | LBP |
| IRS2 | LPL |
| LIPC | CCL2 |
| BCL2 | ADIPOQ |
| MAPK8IP1 | ICAM1 |
| PPARGC1A | CYP2E1 |
| EDN1 | F2 |
| EDNRA | PMCH |
| SIRT1 | ACSL1 |
| HMOX1 | FOXO3 |
| HP | GPX3 |
| ICAM1 | HK2 |
| LEP | NPY5R |
| LEPR | CD40 |
| NOS3 | HADH |
| TNF | ADRB2 |
| UCP2 | ADRB3 |
| ADIPOQ | GLUL |
| TNFRSF1A | APOE |
| NOS2 | INS |
| KL | NPY1R |
| CPT1A | GHRL |
| SNAP25 | INPP5E |
| EDNRB | TF |
| ATP2A2 | FTO |
| IGF2BP2 | NEIL1 |
| SLC30A8 | CARTPT |
| GLIS3 | ADCY3 |
| JAZF1 | GNAS |
| GCGR | NPC1 |
| GCKR | PRKAR1A |
| GLP1R | AHR |
| KCNQ1 | SDCCAG8 |
| MTNR1B | MYT1L |
| RETN | NTRK2 |
| PTPN1 | SDC3 |
| FTO | KCNMA1 |
| THADA | RAI1 |
| HMG20A | MRAP2 |
| NOTCH2 | BBS9 |
| PROX1 | BBS2 |
| GPD2 | VPS13B |
| UBE2E2 | AFF4 |
| KCNK16 | HOXB5 |
| AP3S2 | PACS1 |
| MAEA | BBS10 |
| GRB14 | PHF6 |
| PEPD | NAMPT |
| CMIP | TTC8 |
| ITGA1 | TMEM18 |
| PAM | BBS5 |
| PLEKHA1 | GNPDA2 |
| ZFAND3 | BBS12 |
| DGKD | DPYD |
| CCND2 | RMST |
| PSMD6 | AKT1 |
| KSR2 | FAAH |
| NFATC2 | FASN |
| ZNF257 | NEGR1 |
| KLF14 | FGF21 |
| CYBA | GCG |
| ETS1 | GH1 |
| FBN1 | GNB3 |
| CNKSR2 | HCRT |
| JADE2 | HTR2C |
| AUTS2 | IGF2 |
| EPC2 | AQP7 |
| FGF21 | LDLR |
| GCG | MC3R |
| GNB3 | MMP9 |
| GP2 | SERPINE1 |
| GSTM1 | ANGPTL4 |
| HHEX | PLIN1 |
| IAPP | PPARA |
| IDE | PPARD |
| IGF2 | MKS1 |

| **Rheumatoid arthritis** | **Osteoporosis** |
| --- | --- |
| PTPN22 | LRP5 |
| SLC22A4 | COL1A1 |
| TNF | VDR |
| CRP | WNT1 |
| IL6ST | COL1A2 |
| CCR6 | PTH |
| FCGR2A | TGFB1 |
| PADI4 | TNFSF11 |
| HLA-DPB1 | CYP19A1 |
| HLA-DRB1 | TNFRSF11B |
| IL2RA | CALCR |
| IL6R | PDLIM4 |
| IL10 | GORAB |
| IRF5 | ANTXR2 |
| CIITA | ESR1 |
| STAT4 | ESR2 |
| TNFAIP3 | IGF1 |
| TRAF1 | IL6 |
| TRAF6 | AR |
| CD28 | KL |
| CD40 | REN |
| PTPN2 | SOD2 |
| TYK2 | GPC6 |
| RUNX1 | POMC |
| PTPRC | CA2 |
| AGER | GAPDH |
| IL2RB | GPX1 |
| NFKBIL1 | GSN |
| AFF3 | ANXA2 |
| REL | LTF |
| BLK | P4HB |
| CDK6 | ZDHHC13 |
| CD244 | TPM4 |
| MMEL1 | HDAC5 |
| ANKRD55 | TUBA1B |
| GATA3 | CAP1 |
| NFKBIE | CCT2 |
| PLD4 | PRDX3 |
| DNASE1L3 | ADCY5 |
| KIF5A | PARK7 |
| ARID5B | MGLL |
| RASGRP1 | CYP24A1 |
| CSF2 | ENO1 |
| CTLA4 | FGA |
| ACAN | FGB |
| RCAN1 | SIRT1 |
| AHR | DAAM2 |
| SPRED2 | PGLS |
| ENO1 | GPD2 |
| ANXA3 | RAB7B |
| HLA-DQA2 | IDH2 |
| IFNG | IL6R |
| CCN1 | LEP |
| IL1B | ATIC |
| IL1RN | PNP |
| IL6 | OXCT1 |
| CXCL8 | PKM |
| IL18 | PLEK |
| MIF | PSMA2 |
| MMP2 | PSMA5 |
| MPO | RSU1 |
| MTHFR | BGLAP |
| NCF2 | CLEC11A |
| TNFRSF11B | TLN1 |
| FOXP3 | ACTG1 |
| IL23A | TPI1 |
| ABCB1 | U2AF1 |
| PON1 | VCL |
| PTGS2 | PIR |
| CCL21 | WDR1 |
| SLC11A1 | GH1 |
| STAT1 | IL1B |
| TLR2 | ACE |
| VEGFA | AGER |
| CXCR4 | IRS2 |
| CAT | IRAK3 |
| ADIPOQ | MAPK14 |
| CCN2 | GHR |
| TNFSF14 | IGF2 |
| DHFR | CIITA |
| TNFRSF14 | MYC |
| TAGAP | PCNA |
| IRAK1 | BAX |
| COL2A1 | BCL2 |
| ALOX5 | DSPP |
| GC | DKK1 |
| HOXD13 | ID4 |
| NCF1 | IFNGR1 |
| TXNDC5 | IRS1 |
| GRK2 | PLS3 |
| FPGS | PTGER4 |
| IGFBP3 | BMP2 |
| FASLG | RUNX2 |
| ATIC | TNFRSF11A |
| PRKCQ | NOTCH2 |
| PTGS1 | PPARG |
| CCL8 | CYP17A1 |
| SOD2 | LRP6 |
| GGH | SOX6 |
| B3GNT2 | ALB |

| **Chronic obstructive pulmonary disease** | **Heart failure** |
| --- | --- |
| MMP1 | PPARGC1A |
| HMOX1 | ADRB1 |
| SFTPD | GRK2 |
| HDAC2 | ACE |
| MMP9 | AGT |
| TGFB1 | AGTR1 |
| FAM13A | EDN1 |
| SERPINA1 | HIF1A |
| DSP | IL6 |
| ELN | NOS3 |
| EPHX1 | NPPA |
| MTCL1 | NPPB |
| IL6 | ATP2A2 |
| CXCL8 | TNF |
| EEFSEC | CCL2 |
| TNF | HMOX1 |
| NOS3 | SOD2 |
| CYP1A1 | MSTN |
| SOD3 | ADRB3 |
| FOXO3 | HTR2B |
| NOS2 | RAC1 |
| CXCL1 | CRP |
| CYP1A2 | CCN2 |
| HTR2A | EDNRA |
| TRPV4 | ALB |
| RAPGEF3 | GCG |
| TP53 | NRG1 |
| CXCL2 | IL1B |
| MMP14 | NR3C2 |
| KLF5 | PIK3CG |
| TNNT2 | AVP |
| CD8A | PTH |
| IL17A | REN |
| MIR218-2 | VEGFA |
| MUC5AC | ADIPOQ |
| NFE2L2 | GDF15 |
| TIMP1 | SIRT1 |
| VEGFA | PPARG |
| EGFR | PPP1R1A |
| CASP3 | ADRA2C |
| SERPINE1 | CYBB |
| MUC1 | NFE2L2 |
| PLAU | PTGS2 |
| SLPI | NOX4 |
| CCN2 | SLC9A1 |
| MPO | TNFRSF1A |
| STAT4 | UCN2 |
| DDIT3 | NOS2 |
| SMAD4 | SERPINE1 |
| BNIP3 | PON1 |
| CASP12 | PRL |
| CFTR | EDNRB |
| CHRNA3 | VWF |
| CHRNA5 | PEBP1 |
| NQO1 | RETN |
| AGER | TLR2 |
| ERBB3 | CS |
| FAIM2 | CSF2 |
| FAS | EPHX2 |
| FASLG | GSK3B |
| IREB2 | IFNG |
| PLAUR | CXCL8 |
| SMPD3 | NPR1 |
| CASP8 | OLR1 |
| CHRNB4 | POMC |
| CTLA4 | AVPR2 |
| MMP3 | RBP4 |
| HSPA4 | XDH |
| CHRM3 | CSF3 |
| SCGB1A1 | CFD |
| PLB1 | GATM |
| PRTN3 | ACACA |
| THSD4 | ACADS |
| CYBA | SOD3 |
| HSPA1A | TNNT2 |
| HTR4 | UCP1 |
| NFKB1 | NRIP1 |
| RNF150 | CAT |
| TNS1 | HAND2 |
| CDH13 | ROCK2 |
| HYKK | FBLN5 |
| CYBB | DSTN |
| DNAAF4 | CIDEA |
| PSORS1C1 | ADM |
| DLG2 | ADRB2 |
| DNAH5 | FASN |
| DOCK1 | BAMBI |
| PDZD2 | NOX1 |
| NPNT | GPX4 |
| HLA-DPA1 | CXCL2 |
| HLA-DPB1 | APCS |
| HSPA1B | HSPB1 |
| HSPA1L | APOC1 |
| INPP5D | IGF1 |
| KCNK1 | INS |
| ARHGEF38 | ITGB1 |
| INTS12 | LGALS3 |
| CSMD1 | MME |
| WIPF1 | MMP9 |
| FTO | ACLY |

| **Schizophrenia** | **Asthma** |
| --- | --- |
| AKT1 | TBX21 |
| MAGI2 | IL5 |
| CHRNA7 | IL13 |
| GRIN2B | CCL11 |
| HTR2A | TGFB1 |
| NOS1 | ICAM1 |
| RELN | IL4 |
| SRR | IL6 |
| CSMD1 | MMP9 |
| TCF4 | NOS2 |
| SHANK3 | CCL2 |
| NRXN1 | CCL5 |
| RTN4R | SCGB3A2 |
| SP4 | ADRB2 |
| SETD1A | ALOX5 |
| PPP3R1 | HLA-DQB1 |
| SYNGAP1 | HLA-DRB1 |
| MDK | HLA-G |
| NRG3 | GSDMB |
| CNR1 | TNF |
| DISC1 | TSLP |
| GRM5 | IL33 |
| GSK3B | IL1RL1 |
| ZDHHC8 | ORMDL3 |
| APOE | HLA-DQA1 |
| NR4A2 | IL6R |
| SLC6A3 | RAD50 |
| DTNBP1 | PDE4D |
| PPP1R1B | IKZF3 |
| KMO | HNMT |
| CPLX2 | CDHR3 |
| BACE1 | KIF3A |
| MBP | PYHIN1 |
| TAAR1 | MUC7 |
| MAP6 | PLA2G7 |
| PTGS2 | DNAH5 |
| PLCB1 | TNIP1 |
| LRRTM1 | WDR36 |
| MAP2K7 | PTGDR2 |
| NLGN2 | CCR3 |
| SLC6A1 | PARP1 |
| YWHAH | EDN1 |
| MTOR | GATA3 |
| AVPR1A | GSTM1 |
| ZIC2 | GSTP1 |
| GNAS | HLA-DPB1 |
| BECN1 | TNC |
| CHI3L1 | IL1B |
| COMT | IL1RN |
| DRD3 | IL2RA |
| BRD1 | IL4R |
| DAOA | ARG1 |
| DISC2 | NPSR1 |
| ANK3 | RNASE3 |
| GRIA1 | STAT6 |
| GRM3 | VEGFA |
| NRG1 | CAT |
| HLA-DRB1 | CD14 |
| MTHFR | ARG2 |
| NCAM1 | AREG |
| NOTCH4 | NQO1 |
| NRGN | MMP1 |
| PDE4B | ALDH2 |
| ABCB1 | CTNNA3 |
| PRODH | SOD1 |
| SLC1A1 | BCL2 |
| TBX1 | RUNX3 |
| CACNA1C | HMOX1 |
| ZNF804A | PLAU |
| FOXP2 | TRPA1 |
| FEZ1 | IFNL3 |
| NOS1AP | NPY |
| SRGAP3 | PTEN |
| SYN2 | MMP10 |
| MED12 | ADCY2 |
| CHRNA5 | ADCYAP1R1 |
| HLA-DQB1 | MYB |
| VRK2 | BGLAP |
| HLA-A | SPRR2B |
| NDE1 | TIMP3 |
| DLG2 | CCL26 |
| GABBR1 | DNMT1 |
| MIR137HG | EGFR |
| ARVCF | NR3C1 |
| TCF7L2 | HSD11B2 |
| FYN | IL10 |
| CNNM2 | IL17A |
| YWHAE | KRT19 |
| TSPAN18 | MUC5AC |
| TSNARE1 | SERPINE1 |
| MPC2 | IL22 |
| ITIH3 | PDE4B |
| NTRK3 | SERPINA1 |
| PBRM1 | PPP2CA |
| MAD1L1 | PTGS2 |
| DCC | DPP10 |
| ESR2 | CCL17 |
| NKAPL | SCGB1A1 |
| HLA-B | CXCL14 |
| MSRA | AGER |

| **Schizophrenia** | **Rheumatoid arthritis** |
| --- | --- |
| AKT1 | PTPN22 |
| MAGI2 | SLC22A4 |
| CHRNA7 | TNF |
| GRIN2B | CRP |
| HTR2A | IL6ST |
| NOS1 | CCR6 |
| RELN | FCGR2A |
| SRR | PADI4 |
| CSMD1 | HLA-DPB1 |
| TCF4 | HLA-DRB1 |
| SHANK3 | IL2RA |
| NRXN1 | IL6R |
| RTN4R | IL10 |
| SP4 | IRF5 |
| SETD1A | CIITA |
| PPP3R1 | STAT4 |
| SYNGAP1 | TNFAIP3 |
| MDK | TRAF1 |
| NRG3 | TRAF6 |
| CNR1 | CD28 |
| DISC1 | CD40 |
| GRM5 | PTPN2 |
| GSK3B | TYK2 |
| ZDHHC8 | RUNX1 |
| APOE | PTPRC |
| NR4A2 | AGER |
| SLC6A3 | IL2RB |
| DTNBP1 | NFKBIL1 |
| PPP1R1B | AFF3 |
| KMO | REL |
| CPLX2 | BLK |
| BACE1 | CDK6 |
| MBP | CD244 |
| TAAR1 | MMEL1 |
| MAP6 | ANKRD55 |
| PTGS2 | GATA3 |
| PLCB1 | NFKBIE |
| LRRTM1 | PLD4 |
| MAP2K7 | DNASE1L3 |
| NLGN2 | KIF5A |
| SLC6A1 | ARID5B |
| YWHAH | RASGRP1 |
| MTOR | CSF2 |
| AVPR1A | CTLA4 |
| ZIC2 | ACAN |
| GNAS | RCAN1 |
| BECN1 | AHR |
| CHI3L1 | SPRED2 |
| COMT | ENO1 |
| DRD3 | ANXA3 |
| BRD1 | HLA-DQA2 |
| DAOA | IFNG |
| DISC2 | CCN1 |
| ANK3 | IL1B |
| GRIA1 | IL1RN |
| GRM3 | IL6 |
| NRG1 | CXCL8 |
| HLA-DRB1 | IL18 |
| MTHFR | MIF |
| NCAM1 | MMP2 |
| NOTCH4 | MPO |
| NRGN | MTHFR |
| PDE4B | NCF2 |
| ABCB1 | TNFRSF11B |
| PRODH | FOXP3 |
| SLC1A1 | IL23A |
| TBX1 | ABCB1 |
| CACNA1C | PON1 |
| ZNF804A | PTGS2 |
| FOXP2 | CCL21 |
| FEZ1 | SLC11A1 |
| NOS1AP | STAT1 |
| SRGAP3 | TLR2 |
| SYN2 | VEGFA |
| MED12 | CXCR4 |
| CHRNA5 | CAT |
| HLA-DQB1 | ADIPOQ |
| VRK2 | CCN2 |
| HLA-A | TNFSF14 |
| NDE1 | DHFR |
| DLG2 | TNFRSF14 |
| GABBR1 | TAGAP |
| MIR137HG | IRAK1 |
| ARVCF | COL2A1 |
| TCF7L2 | ALOX5 |
| FYN | GC |
| CNNM2 | HOXD13 |
| YWHAE | NCF1 |
| TSPAN18 | TXNDC5 |
| TSNARE1 | GRK2 |
| MPC2 | FPGS |
| ITIH3 | IGFBP3 |
| NTRK3 | FASLG |
| PBRM1 | ATIC |
| MAD1L1 | PRKCQ |
| DCC | PTGS1 |
| ESR2 | CCL8 |
| NKAPL | SOD2 |
| HLA-B | GGH |
| MSRA | B3GNT2 |

| **Multiple sclerosis** | **Peroxisomal disorders** |
| --- | --- |
| CLEC16A | HSD17B4 |
| HLA-DRB1 | PIPOX |
| IL2RA | PEX6 |
| IL7R | PEX1 |
| TNFRSF1A | ABCD1 |
| CD40 | TRIM37 |
| CD58 | ACOX1 |
| TYK2 | PEX5 |
| KIF1B | PHEX |
| HLA-DRA | DNM1L |
| CBLB | PAF1 |
| STAT4 | PEX2 |
| TNFAIP3 | DHRS11 |
| TNFSF14 | PEX3 |
| CD6 | ACBD5 |
| NLRP3 | PEX12 |
| HLA-DPB1 | PEX10 |
| HLA-DQB1 | HSD17B7 |
| ICAM1 | LPA |
| IRF8 | HSD17B13 |
| IFNB1 | HADH |
| IFNG | AMACR |
| APOE | SIRT1 |
| IL1B | EPAS1 |
| IL1RN | ABCG2 |
| IL7 |  |
| IL10 |  |
| IL17A |  |
| P2RX7 |  |
| VDR |  |
| CNR1 |  |
| GC |  |
| CASP1 |  |
| SLC11A1 |  |
| CLDN11 |  |
| POMC |  |
| PDCD1 |  |
| NECTIN2 |  |
| SELE |  |
| VCAM1 |  |
| IL12A |  |
| RBPJ |  |
| MCAM |  |
| KCNJ10 |  |
| BCHE |  |
| TNF |  |
| PRF1 |  |
| CYP27B1 |  |
| LRCH1 |  |
| HLA-A |  |
| HLA-B |  |
| HLA-DQA1 |  |
| STAT3 |  |
| CD226 |  |
| IL23R |  |
| GPC5 |  |
| NR1H3 |  |
| MAPK1 |  |
| IFIH1 |  |
| EVI5 |  |
| ATG5 |  |
| ERG |  |
| KIF21B |  |
| TAP2 |  |
| CCR6 |  |
| PTPN22 |  |
| MGAT5 |  |
| FCRL3 |  |
| TAGAP |  |
| CCR3 |  |
| ITGAM |  |
| NOTCH4 |  |
| RGS1 |  |
| CXCR5 |  |
| CD86 |  |
| MERTK |  |
| SP140 |  |
| GALC |  |
| GFI1 |  |
| HSPA1L |  |
| TMEM39A |  |
| PTPN2 |  |
| RPS6KB1 |  |
| MMEL1 |  |
| ANKRD55 |  |
| TSFM |  |
| MPHOSPH9 |  |
| MALT1 |  |
| ADAD1 |  |
| ZBTB46 |  |
| CTSH |  |
| ZNF433 |  |
| ERBB3 |  |
| ICOSLG |  |
| ICOS |  |
| HLA-DMB |  |
| HLA-DQA2 |  |
| HLA-DRB4 |  |
| IRGM |  |
| IFNGR2 |  |

**Supplementary Data File 2:** Condition concept names in the TWOSIDES database used to compile the 4 drug groups for each of the disease pairs

| **Anxiety-Depression** | |
| --- | --- |
| Anxiety: condition_concept_name | Depression: condition_concept_name |
| Anxiety | Depression |
| Anxiety disorder | Major depression |
| Generalised anxiety disorder | Depressive symptom |
| Adjustment disorder with anxiety | Depression suicidal |
| Adjustment disorder with mixed anxiety and depressed mood | Depression postoperative |
|  | Postpartum depression |
|  | Depressive delusion |
|  | Agitated depression |

| **Type 2 diabetes-Obesity** | |
| --- | --- |
| Type 2 diabetes: condition_concept_name | Obesity: condition_concept_name |
| Type 2 diabetes mellitus | Obesity |
| Diabetes mellitus inadequate control | Central obesity |
| Diabetes mellitus non-insulin-dependent |  |
| Insulin-requiring type 2 diabetes mellitus |  |
| Insulin resistant diabetes |  |

| **Rheumatoid arthritis-Osteoporosis** | |
| --- | --- |
| Rheumatoid arthritis: condition_concept_name | Osteoporosis: condition_concept_name |
| Rheumatoid arthritis | Osteoporosis |

| **Parkinson's disease-Schizophrenia** | |
| --- | --- |
| Parkinson's disease: condition_concept_name | Schizophrenia: condition_concept_name |
| Parkinson's disease | Schizophrenia |
| Parkinsonism | Schizophrenia, paranoid type |
| Parkinsonian rest tremor | Schizophreniform disorder |
| Parkinsonian gait | Schizophrenia, disorganised type |
|  | Schizophrenia, undifferentiated type |

| **Asthma-Hypertension** | |
| --- | --- |
| Asthma: condition_concept_name | Hypertension: condition_concept_name |
| Asthma | Hypertension |
| Cardiac asthma | Pulmonary arterial hypertension |
| Status asthmaticus | Pulmonary hypertension |
| Asthmatic crisis | Essential hypertension |
| Analgesic asthma syndrome | Portal hypertension |
| Asthma exercise induced | Benign intracranial hypertension |
|  | Malignant hypertension |
|  | Labile hypertension |
|  | Ocular hypertension |
|  | Systolic hypertension |
|  | Procedural hypertension |
|  | Renal hypertension |
|  | Renovascular hypertension |
|  | Accelerated hypertension |
|  | Orthostatic hypertension |
|  | Gestational hypertension |
|  | Diastolic hypertension |
|  | Secondary hypertension |
|  | Congenital pulmonary hypertension |
|  | Pregnancy induced hypertension |

| **Chronic obstructive pulmonary disease-Heart failure** | |
| --- | --- |
| Chronic obstructive pulmonary disease: condition_concept_name | Heart failure: condition_concept_name |
| Chronic obstructive pulmonary disease | Cardiac failure |
| Chronic obstructive airways disease | Cardiac failure congestive |
| Chronic obstructive airways disease exacerbated | Cardiac failure acute |
|  | Cardiac failure chronic |
|  | Cardiac failure high output |

**Supplementary Data File 3:** Drugs belonging to the 4 groups in each disease pair compiled based on drug activity in the two diseases.

| **Anxiety-Depression** | | | |
| --- | --- | --- | --- |
| Anxiety drugs not contraindicated in depression | Depression drugs not contraindicated in anxiety | Anxiety drugs contraindicated in depression | Depression drugs contraindicated in anxiety |
| Acetylsalicylic acid | Clomipramine | Hydroxyzine | Buspirone |
| Bromopride | Desipramine | Diazepam | nefazodone |
| Delorazepam | Ephedrine | Oxazepam | Citalopram |
| Etifoxine | Flupentixol | Prazepam | Amitriptyline |
| Glycyrrhiza glabra | Fluphenazine | Lorazepam | Amphetamine |
| Isopropamide | Ginkgo biloba | Oxymorphone |  |
| Ketazolam | Isocarboxazid | Trazodone |  |
| Maprotiline | Lithium cation | Phenobarbital |  |
| Methotrimeprazine | Mianserin | clotiazepam |  |
| Mexazolam | Mirtazapine | Flunitrazepam |  |
| Otilonium | Pindolol | Trimebutine |  |
| Propantheline | Pipradrol |  |  |
|  | Protriptyline |  |  |
|  | Trimipramine |  |  |
|  | Tryptophan |  |  |
|  | Valpromide |  |  |
|  |  |  |  |

| **Type 2 diabetes-Obesity** | | | |
| --- | --- | --- | --- |
| Type 2 diabetes drugs not contraindicated in BMI >30 kg/m2 | BMI >30 kg/m2 drugs not contraindicated in type 2 diabetes | Type 2 diabetes drugs contraindicated in BMI >30 kg/m2 | BMI >30 kg/m2 drugs contraindicated in type 2 diabetes |
| Acarbose | Benzphetamine | glimepiride | Bupropion |
| Albiglutide | Lecithin, soybean | exenatide | Fluoxetine |
| Alogliptin | Lorcaserin | rosiglitazone | Phentermine |
| Bromocriptine | Naltrexone | Metformin | orlistat |
| Canagliflozin | Pipradrol | Simvastatin | Amphetamine |
| Chlorpropamide |  | atorvastatin | sibutramine |
| Colesevelam |  | insulin detemir |  |
| Dapagliflozin |  | Glyburide |  |
| Dulaglutide |  | sitagliptin |  |
| Empagliflozin |  | pioglitazone |  |
| Ertugliflozin |  | topiramate |  |
| Gemigliptin |  | Insulin Lispro |  |
| Gliclazide |  | Glucagon |  |
| Gliquidone |  | Pramlintide |  |
| Insulin degludec |  | repaglinide |  |
| Lipoic acid |  | Insulin Glargine |  |
| Lixisenatide |  | nateglinide |  |
| Luseogliflozin |  | Linagliptin |  |
| Miglitol |  | Glipizide |  |
| Mitiglinide |  |  |  |
| Saxagliptin |  |  |  |
| Semaglutide |  |  |  |
| Teneligliptin |  |  |  |
| Tolazamide |  |  |  |
| Tolbutamide |  |  |  |
| Trelagliptin |  |  |  |
| Vildagliptin |  |  |  |
| Voglibose |  |  |  |

| **Rheumatoid arthritis-Osteoporosis** | | | |
| --- | --- | --- | --- |
| Rheumatoid arthritis drugs not contraindicated in osteoporosis | Osteoporosis drugs not contraindicated in rheumatoid arthritis | Rheumatoid arthritis drugs contraindicated in osteoporosis | Osteoporosis drugs contraindicated in rheumatoid arthritis |
| Aceclofenac | Alendronic acid | Ibuprofen | Lidocaine |
| Acetylsalicylic acid | Boron | Diclofenac | Estradiol |
| Auranofin | Calcium Phosphate | Hydrocortisone | Calcium |
| Azapropazone | Calcium lactate gluconate | Dexamethasone | Calcium Carbonate |
| Betamethasone phosphate | Conjugated estrogens | Acetaminophen | Teriparatide |
| Bupivacaine | Cyproterone acetate | Naproxen | Calcium Citrate |
| Chloroquine | Genistein | Prednisone | zoledronic acid |
| Choline magnesium trisalicylate | L-Glutamine | infliximab | Calcium Gluconate |
| Corticotropin | Medroxyprogesterone acetate | Methylprednisolone | Ibandronate |
| Cortisone acetate | Menatetrenone | Sulfasalazine | Cholecalciferol |
| Dexketoprofen | Norethisterone | prednisolone | salmon calcitonin |
| Diflunisal | Romosozumab | meloxicam | Raloxifene |
| Etofenamate |  | Ranitidine | risedronic acid |
| Etoricoxib |  | Tolmetin |  |
| Fenbufen |  | valdecoxib |  |
| Fenoprofen |  | Etanercept |  |
| Flurbiprofen |  | Omeprazole |  |
| Hydrocortisone acetate |  | Tacrolimus |  |
| Ketoprofen |  | oxaprozin |  |
| Lornoxicam |  | nabumetone |  |
| Meclofenamic acid |  | Triamcinolone |  |
| Methylprednisolone hemisuccinate | denosumab |  |
| Piroxicam cinnamate |  | Betamethasone |  |
| Proglumetacin |  | celecoxib |  |
| Sodium aurothiomalate |  | Piroxicam |  |
| Sulindac |  | leflunomide |  |
| Tenoxicam |  | Hydroxychloroquine |  |
| Tetracosactide |  | Etodolac |  |
| Thiocolchicoside |  | Azathioprine |  |
| Tiaprofenic acid |  |  |  |

| **Chronic obstructive pulmonary disease-Heart failure** | | | |
| --- | --- | --- | --- |
| Chronic obstructive pulmonary disease drugs not contraindicated in heart failure | Heart failure drugs not contraindicated in chronic obstructive pulmonary disease | Chronic obstructive pulmonary disease drugs contraindicated in heart failure | Heart failure drugs contraindicated in chronic obstructive pulmonary disease |
| Aclidinium | Enalaprilat | Arformoterol | Atenolol |
| Beclomethasone dipropionate |  | Budesonide | Benazepril |
| Carmoterol |  | Cefpodoxime | Bisoprolol |
| Ceftibuten |  | Ciclesonide | Bumetanide |
| Clenbuterol |  | Formoterol | Captopril |
| Doxapram |  | Ipratropium | Fosinopril |
| Doxofylline |  | Roflumilast | Furosemide |
| Erdosteine |  | Salmeterol | Hydralazine |
| Fluticasone furoate |  | Terbutaline | Isosorbide dinitrate |
| Fluticasone propionate |  | Theophylline | Losartan |
| Glycopyrronium |  | Tiotropium | Ramipril |
| Indacaterol |  | Tulobuterol | Spironolactone |
| Lactose |  |  | Telmisartan |
| Levosalbutamol |  |  | Trandolapril |
| Olodaterol |  |  |  |
| Oxtriphylline |  |  |  |
| Revefenacin |  |  |  |
| Rufloxacin |  |  |  |
| Salbutamol |  |  |  |
| Umeclidinium |  |  |  |
| Vilanterol |  |  |  |

| **Parkinson's disease-Schizophrenia** | | | |
| --- | --- | --- | --- |
| Parkinson's disease drugs not contraindicated in schizophrenia | Schizophrenia drugs not contraindicated in Parkinson's disease | Parkinson's disease drugs contraindicated in schizophrenia | Schizophrenia drugs contraindicated in Parkinson's disease |
| Amantadine | Amisulpride | Levodopa | Amitriptyline |
| Apomorphine | Aripiprazole lauroxil | ropinirole | aripiprazole |
| Benserazide | Asenapine | Biperiden | Chlorpromazine |
| Bornaprine | Brexpiprazole | Selegiline | Clozapine |
| Bromocriptine | Cariprazine | entacapone | Haloperidol |
| Carbidopa | Chlorprothixene |  | lurasidone |
| Droxidopa | Fluspirilene |  | Mirtazapine |
| Istradefylline | Iloperidone |  | olanzapine |
| Melevodopa | Loxapine |  | Prochlorperazine |
| Opicapone | Lumateperone |  | Promazine |
| Pergolide | Methotrimeprazine |  | Risperidone |
| Piribedil | Molindone |  | Sulpiride |
| Pramipexole | Paliperidone |  | Trazodone |
| Profenamine | Perphenazine |  | Trifluoperazine |
| Rasagiline | Pipotiazine |  | ziprasidone |
| Rotigotine | Sertindole |  |  |
| Safinamide | Thioproperazine |  |  |
| Tolcapone | Thioridazine |  |  |
|  | Thiothixene |  |  |
|  | Zuclopenthixol |  |  |

| **Asthma-Hypertension** | | | |
| --- | --- | --- | --- |
| Asthma drugs not contraindicated in hypertension | Hypertension drugs not contraindicated in asthma | Asthma drugs contraindicated in hypertension | Hypertension drugs contraindicated in asthma |
| Beclomethasone dipropionate | Acebutolol | fluticasone | Metoprolol |
| Carmoterol | Ammonium chloride | montelukast | Indapamide |
| Cortisone acetate | Azilsartan medoxomil | Hydrocortisone | Hydrochlorothiazide |
| Cromoglicic acid | Bendroflumethiazide | Budesonide | Losartan |
| Etafedrine | Benidipine | Dexamethasone | rosuvastatin |
| Fluticasone furoate | Candesartan cilexetil | flunisolide | Amlodipine |
| Fluticasone propionate | Canrenoic acid | salmeterol | Triamterene |
| Indacaterol | Chlorothiazide | Methylprednisolone | Ramipril |
| Lactose | Cilazapril | Terbutaline | quinapril |
| Methoxyphenamine | Cilnidipine | Epinephrine | Captopril |
| Mometasone furoate | Clevidipine | zafirlukast | Felodipine |
| Nedocromil | Clopamide | Prednisone | topiramate |
| Orciprenaline | Delapril | Aminophylline | Lisinopril |
| Oxtriphylline | Enalaprilat | Ipratropium | Propranolol |
| Pranlukast | Eprosartan | formoterol | candesartan |
| Racepinephrine | Guanfacine | Triamcinolone | olmesartan |
| Reproterol | Hydroflumethiazide | Guaifenesin | nebivolol |
| Salbutamol | Lacidipine | Mometasone | Furosemide |
| Vilanterol | Lercanidipine | Chlorpheniramine | irbesartan |
| Zileuton | Levamlodipine | desloratadine | Enalapril |
|  | Methyclothiazide | arformoterol | Fosinopril |
|  | Moexipril | tiotropium | telmisartan |
|  | Moxonidine | Theophylline | Spironolactone |
|  | Nitrendipine | ciclesonide | atorvastatin |
|  | Pindolol | sodium citrate | Perindopril |
|  | Piretanide |  | Clonidine |
|  | Polythiazide |  | aliskiren |
|  | Prazosin |  | urapidil |
|  | Reserpine |  | Isosorbide Dinitrate |
|  | Rilmenidine |  | Bisoprolol |
|  | Torasemide |  | valsartan |
|  | Trandolapril |  | Nadolol |
|  | Xipamide |  | Amiloride |
|  | Zofenopril |  | Labetalol |
|  |  |  | Diltiazem |
|  |  |  | Terazosin |
|  |  |  | benazepril |
|  |  |  | Atenolol |
|  |  |  | Doxazosin |
|  |  |  | Verapamil |
|  |  |  | Nifedipine |
|  |  |  | Isradipine |
|  |  |  | Methyldopa |
|  |  |  | carvedilol |
|  |  |  | Betaxolol |
|  |  |  | eplerenone |
|  |  |  | Celiprolol |
|  |  |  | Nicardipine |
|  |  |  | Nisoldipine |

| **Schizophrenia-Asthma** | | | |
| --- | --- | --- | --- |
| Schizophrenia not contraindicated in asthma | Schizophrenia contraindicated in asthma | Asthma drugs not contraindicated in schizophrenia | Asthma drugs contraindicated in schizophrenia |
| Aripiprazole lauroxil | Amitriptyline | Aminophylline | Chlorpheniramine |
| Asenapine | Aripiprazole | Arformoterol | Dexamethasone |
| Brexpiprazole | Chlorpromazine | Beclomethasone dipropionate | Fluticasone |
| Cariprazine | Clozapine | Budesonide | Guaifenesin |
| Chlorprothixene | Haloperidol | Carmoterol | Hydrocortisone |
| Fluspirilene | Lurasidone | Ciclesonide | Methylprednisolone |
| Iloperidone | Olanzapine | Cortisone acetate | Montelukast |
| Loxapine | Paliperidone | Cromoglicic acid | Prednisone |
| Lumateperone | Perphenazine | Desloratadine | Tiotropium |
| Methotrimeprazine | Prochlorperazine | Epinephrine | Triamcinolone |
| Molindone | Quetiapine | Etafedrine | Zafirlukast |
| Promazine | Risperidone | Flunisolide |  |
| Samidorphan | Thioridazine | Fluticasone furoate |  |
| Sertindole | Thiothixene | Fluticasone propionate |  |
| Sulpiride | Trazodone | Formoterol |  |
| Thioproperazine | Trifluoperazine | Indacaterol |  |
| Zuclopenthixol | Ziprasidone | Ipratropium |  |
|  |  | Lactose |  |
|  |  | Methoxyphenamine |  |
|  |  | Mometasone |  |
|  |  | Mometasone furoate |  |
|  |  | Nedocromil |  |
|  |  | Orciprenaline |  |
|  |  | Oxtriphylline |  |
|  |  | Pranlukast |  |
|  |  | Racepinephrine |  |
|  |  | Reproterol |  |
|  |  | Salbutamol |  |
|  |  | Salmeterol |  |
|  |  | Sodium citrate |  |
|  |  | Terbutaline |  |
|  |  | Theophylline |  |
|  |  | Vilanterol |  |
|  |  | Zileuton |  |

| **Schizophrenia-Rheumatoid arthritis** | | | |
| --- | --- | --- | --- |
| Schizophrenia not contraindicated in rheumatoid arthritis | Schizophrenia contraindicated in rheumatoid arthritis | Rheumatoid arthritis drugs not contraindicated in schizophrenia | Rheumatoid arthritis drugs contraindicated in schizophrenia |
| Aripiprazole lauroxil | Amitriptyline | Aceclofenac | Acetaminophen |
| Asenapine | Aripiprazole | Acetylsalicylic acid | Betamethasone |
| Brexpiprazole | Chlorpromazine | Auranofin | Celecoxib |
| Cariprazine | Clozapine | Azapropazone | Dexamethasone |
| Chlorprothixene | Haloperidol | Azathioprine | Diclofenac |
| Fluspirilene | Olanzapine | Betamethasone phosphate | Etanercept |
| Iloperidone | Prochlorperazine | Bupivacaine | Etodolac |
| Loxapine | Quetiapine | Chloroquine | Hydrocortisone |
| Lumateperone | Risperidone | Choline magnesium trisalicylate | Ibuprofen |
| Methotrimeprazine | Thioridazine | Corticotropin | Meloxicam |
| Molindone | Thiothixene | Cortisone acetate | Methylprednisolone |
| Promazine | Trazodone | Denosumab | Nabumetone |
| Samidorphan | Ziprasidone | Dexketoprofen | Naproxen |
| Sertindole |  | Diflunisal | Omeprazole |
| Sulpiride |  | Etofenamate | Oxaprozin |
| Thioproperazine |  | Etoricoxib | Piroxicam |
| Zuclopenthixol |  | Fenbufen | Prednisone |
| Lurasidone |  | Fenoprofen | Ranitidine |
| Paliperidone |  | Flurbiprofen | Triamcinolone |
| Perphenazine |  | Hydrocortisone acetate |  |
| Trifluoperazine |  | Hydrocortisone succinate |  |
|  |  | Hydroxychloroquine |  |
|  |  | Ketoprofen |  |
|  |  | Leflunomide |  |
|  |  | Lornoxicam |  |
|  |  | Meclofenamic acid |  |
|  |  | Methylprednisolone hemisuccinate | |
|  |  | Niflumic acid |  |
|  |  | Piroxicam cinnamate |  |
|  |  | Prednisolone |  |
|  |  | Proglumetacin |  |
|  |  | Sodium aurothiomalate |  |
|  |  | Sulfasalazine |  |
|  |  | Sulindac |  |
|  |  | Tacrolimus |  |
|  |  | Tenoxicam |  |
|  |  | Tetracosactide |  |
|  |  | Thiocolchicoside |  |
|  |  | Tiaprofenic acid |  |
|  |  | Tolmetin |  |
|  |  | Valdecoxib |  |

| **Multiple sclerosis-Peroxisomal disorders** | |
| --- | --- |
| Multiple sclerosis drugs | Peroxisomal disorder drugs |
| Amantadine | Cholic acid |
| Azathioprine |  |
| Baclofen |  |
| Cannabidiol |  |
| Dalfampridine |  |
| Dantrolene |  |
| Dimethyl fumarate |  |
| Glatiramer |  |
| Methotrexate |  |
| Modafinil |  |
| Ozanimod |  |
| Peginterferon beta-1a |  |
| Teriflunomide |  |

**Supplementary Data File 4:** Proteins targeted by the drugs in each of the 4 groups for each of the disease pairs.

| **Anxiety-Depression** | | | |
| --- | --- | --- | --- |
| Anxiety drugs not contraindicated in depression | Depression drugs not contraindicated in anxiety | Anxiety drugs contraindicated in depression | Depression drugs contraindicated in anxiety |
| DRD2 | HTR2C | HRH1 | DRD2 |
| GABRA1 | HTR2B | KCNH2 | HTR1A |
| CHRM4 | HTR2A | GABRA1 | DRD3 |
| CHRM3 | SLC6A4 | OPRM1 | ADRA1A |
| ADRA2A | GSTP1 | OPRD1 | DRD4 |
| HTR7 | SLC6A2 | HTR1A | ADRA2A |
| SLC6A2 | SMPD1 | SLC6A4 | HTR2A |
| ADRA1A | ADRA1A | ADRA2A | SLC6A4 |
| HRH1 | CHRM1 | ADRA1A | SLC6A3 |
| CHRM5 | DRD2 | HTR2A | HTR2C |
| HTR2A | HRH1 | HTR2C | SLC6A2 |
| CHRM1 | HTR1A | GRIA2 | KCNH2 |
| CHRM2 | ADRA2A | CHRNA4 | ADRA1B |
| HTR2C | ADRB2 | CHRNA7 | HRH1 |
| DRD4 | CHRM5 | GRIN1 | HTR1D |
| DRD1 | CHRM2 | GRIK2 | HTR6 |
| ADRA2B | CHRM3 | NR1I2 | HTR7 |
| ADRA2C | CHRM4 | CHRM4 | HRH2 |
| DRD5 | ADRB1 | CHRM2 | CHRM1 |
| ADRA1D | DRD1 | CHRM1 | OPRD1 |
| DRD3 | CALM1 | CHRM3 | SIGMAR1 |
| ADRA1B | AR | KCNMA1 | HTR1B |
|  | MAOA | CACNA1G | KCNA1 |
|  | MAOB | CACNA1C | OPRK1 |
|  | OPRK1 |  | OPRM1 |
|  | SLC6A3 |  | NTRK1 |
|  | ADRA2B |  | HRH4 |
|  | HTR7 |  | ADRA1D |
|  | DRD3 |  | KCNQ2 |
|  | HTR6 |  | NTRK2 |
|  | HTR1F |  | KCNQ3 |
|  | HRH4 |  | MAOA |
|  | ADRA2C |  | CARTPT |
|  | ADRB3 |  | ADRB1 |
|  | HTR1B |  | SLC18A2 |
|  | HTR1D |  | TAAR1 |
|  | HTR3A |  | MAOB |
|  | ADRA1B |  |  |
|  | WARS |  |  |
|  | WARS2 |  |  |

| **Parkinson's disease-Schizophrenia** | | | |
| --- | --- | --- | --- |
| Parkinson's disease drugs not contraindicated in schizophrenia | Schizophrenia drugs not contraindicated in Parkinson's disease | Parkinson's disease drugs contraindicated in schizophrenia | Schizophrenia drugs contraindicated in Parkinson's disease |
| DRD2 | HTR2A | DRD3 | HTR1D |
| GRIN3A | HTR7 | DRD2 | HTR6 |
| CHRNA4 | DRD2 | DRD5 | HTR7 |
| CHRNA7 | DRD3 | DRD1 | HRH2 |
| CHRNA3 | DRD4 | DRD4 | SLC6A4 |
| DRD5 | HTR2B | ADRA1A | CHRM1 |
| HTR1A | HTR2C | CHRM1 | OPRD1 |
| ADRA2A | ADRA2C | MAOA | ADRA1B |
| HTR1B | HRH1 | MAOB | SLC6A2 |
| HTR2B | HTR1B | COMT | SIGMAR1 |
| HTR2C | HTR6 |  | HTR1B |
| ADRA2B | HTR1A |  | ADRA1A |
| DRD1 | ADRB2 |  | KCNA1 |
| HTR2A | HRH2 |  | HTR1A |
| ADRA2C | ADRA2B |  | HRH1 |
| HTR1D | ADRA2A |  | OPRK1 |
| DRD4 | ADRB1 |  | OPRM1 |
| DRD3 | ADRA1A |  | NTRK1 |
| DDC | DRD1 |  | HRH4 |
| ADRA1D | HTR5A |  | ADRA1D |
| HTR7 | ADRA1B |  | HTR2C |
| ADRA1A | CHRM2 |  | HTR2A |
| ADRA1B | CHRM1 |  | ADRA2A |
| ADRB2 | CHRM4 |  | KCNQ2 |
| PAH | CHRM3 |  | NTRK2 |
| ADRB1 | CHRM5 |  | KCNH2 |
| ADRB3 | CACNG1 |  | KCNQ3 |
| ADORA2A | SLC6A2 |  | CHRM3 |
| ADORA1 | HTR1E |  | HTR3A |
| COMT | HTR3A |  | HTR1E |
| CHRM2 | DRD5 |  | DRD2 |
| CHRM1 | SLC6A3 |  | DRD4 |
| MAOB | HTR1D |  | CHRM2 |
| BCL2 | SLC6A4 |  | ADRA2B |
|  | HRH4 |  | DRD3 |
|  | GRIN2B |  | ADRA2C |
|  | ADRA1D |  | DRD5 |
|  | CALM1 |  | CHRM4 |
|  | KCNH2 |  | CHRM5 |
|  |  |  | DRD1 |
|  |  |  | SLC6A3 |
|  |  |  | ADRB1 |
|  |  |  | GRIN1 |
|  |  |  | HTR5A |
|  |  |  | HRH3 |
|  |  |  | HTR2B |
|  |  |  | ADRB2 |
|  |  |  | ORM1 |
|  |  |  | CALM1 |
|  |  |  | SMPD1 |
|  |  |  | CALY |
|  |  |  | GSTP1 |
|  |  |  | GRIN2B |
|  |  |  | MCHR1 |
|  |  |  | SLC18A2 |
|  |  |  | GABRA1 |
|  |  |  | CA2 |
|  |  |  | CA3 |
|  |  |  | S100A4 |
|  |  |  | TNNC1 |

| **Asthma-Hypertension** | | | |
| --- | --- | --- | --- |
| Asthma drugs not contraindicated in hypertension | Hypertension drugs not contraindicated in asthma | Asthma drugs contraindicated in hypertension | Hypertension drugs contraindicated in asthma |
| NR3C1 | ADRB1 | NR3C1 | ADRB2 |
| ADRB2 | ADRB2 | PGR | ADRB1 |
| GLT6D1 | CA4 | NR3C2 | SLC12A3 |
| LGALS3 | CA1 | PLA2G4A | KCNMA1 |
| GLTP | CA2 | CYSLTR1 | AGTR1 |
| GLB1 | SLC12A3 | ALOX5 | HMGCR |
| CYSLTR2 | KCNMA1 | ANXA1 | ITGAL |
| CYSLTR1 | CACNA1C | NR0B1 | CA1 |
| FPR1 | CACNA1G | NOS2 | CACNB1 |
| PTGDR | CACNA1B | NR1I2 | CACNA1B |
| HSP90AA1 | ACE | ADRB2 | CACNA1C |
| HDAC2 | CACNA1F | ADRB1 | CACNA2D3 |
| ADORA2A | CACNA1S | ADRB3 | CACNA1I |
| PDE3A | CACNA1D | ADRA1B | SMPD1 |
| ADORA1 | BDKRB1 | ADRA1A | SCNN1G |
| PDE4A | AGTR1 | ADRA1D | SCNN1A |
| IL5 | ADRA2B | ADRA2B | SCNN1B |
| MUC2 | ADRA2A | ADRA2A | SCNN1D |
| RNASE3 | SLC12A1 | TNF | ACE |
| TNF | CA12 | ADORA1 | BDKRB1 |
| NFKB1 | CA9 | PDE3A | MMP9 |
| ADRA1A | ATP1A1 | ADORA3 | MMP2 |
| ADRB1 | CA7 | HDAC2 | LTA4H |
| ADRA2A | CACNG1 | CHRM1 | NR3C2 |
| ADRB3 | NOS2 | CHRM2 | CACNB2 |
| ADRA1B | NOS3 | CHRM3 | CACNA1D |
| ADRA2B | NISCH | GRIN1 | CACNA2D1 |
| ADRA1D | CACNA1H | SLC6A3 | PDE1B |
| ADRA2C | CACNA2D2 | SLC6A4 | CACNA1S |
| ALOX5 | CACNB2 | HRH1 | CACNA2D2 |
|  | CACNA2D1 | SLC6A2 | PDE1A |
|  | HTR1A | CHRM5 | CACNA1H |
|  | ADRB3 | CHRM4 | CALM1 |
|  | HTR1B | ADORA2B | TNNC1 |
|  | ADRA1B | PDE4A | TNNC2 |
|  | KCNH2 | PDE4B | SCN1A |
|  | ADRA1A | ADORA2A | GABRA1 |
|  | ADRA1D | PDE5A | CA4 |
|  | SLC18A1 | CPNE1 | GRIK1 |
|  | SLC18A2 | TTLL3 | CA2 |
|  | BIRC5 | RIC3 | CACNA1E |
|  | SLC12A2 | PARP1 | CA3 |
|  |  | NOMO1 | REN |
|  |  | HM13 | ADRB3 |
|  |  |  | HTR1B |
|  |  |  | HTR1A |
|  |  |  | SLC12A1 |
|  |  |  | GPR35 |
|  |  |  | JUN |
|  |  |  | PPARG |
|  |  |  | AR |
|  |  |  | CYP11B2 |
|  |  |  | NR3C1 |
|  |  |  | PGR |
|  |  |  | SHBG |
|  |  |  | CYP17A1 |
|  |  |  | SRD5A1 |
|  |  |  | CACNG1 |
|  |  |  | NR1I2 |
|  |  |  | AHR |
|  |  |  | DPP4 |
|  |  |  | HDAC2 |
|  |  |  | NR1I3 |
|  |  |  | SFRP4 |
|  |  |  | ADRA2A |
|  |  |  | ADRA1A |
|  |  |  | ADRA2B |
|  |  |  | ADRA1D |
|  |  |  | ADRA1B |
|  |  |  | ADRA2C |
|  |  |  | ASIC1 |
|  |  |  | ASIC2 |
|  |  |  | SLC9A1 |
|  |  |  | AOC1 |
|  |  |  | PLAU |
|  |  |  | KCNH7 |
|  |  |  | KCNH6 |
|  |  |  | KCNH2 |
|  |  |  | TGFB1 |
|  |  |  | KCNJ11 |
|  |  |  | CACNA1G |
|  |  |  | CACNA1A |
|  |  |  | SLC6A4 |
|  |  |  | KCND3 |
|  |  |  | APLP1 |
|  |  |  | APP |
|  |  |  | CYB5A |
|  |  |  | HDAC1 |
|  |  |  | ASPA |
|  |  |  | ESR1 |
|  |  |  | HDAC4 |
|  |  |  | APLP2 |
|  |  |  | DAND5 |
|  |  |  | HDAC8 |
|  |  |  | TP73 |
|  |  |  | DDC |
|  |  |  | DCD |
|  |  |  | MPG |
|  |  |  | HBB |
|  |  |  | APOA2 |
|  |  |  | INS |
|  |  |  | AGT |
|  |  |  | CPN1 |
|  |  |  | C4BPB |
|  |  |  | ORM2 |
|  |  |  | IL3 |
|  |  |  | C1R |
|  |  |  | CFI |
|  |  |  | MT2A |
|  |  |  | CP |
|  |  |  | IGFALS |
|  |  |  | KNG1 |
|  |  |  | IDH3G |
|  |  |  | IGLV3-21 |
|  |  |  | MDM2 |
|  |  |  | CFB |
|  |  |  | KRT9 |
|  |  |  | ITIH1 |
|  |  |  | S100A9 |
|  |  |  | PARP1 |
|  |  |  | MT3 |
|  |  |  | FCN3 |
|  |  |  | C3 |
|  |  |  | PZP |
|  |  |  | NME1 |
|  |  |  | ENO1 |
|  |  |  | KRT6A |
|  |  |  | PGLYRP2 |
|  |  |  | PDCD6 |
|  |  |  | A1BG |
|  |  |  | PRDX1 |
|  |  |  | TUFM |
|  |  |  | VTN |
|  |  |  | ITIH4 |
|  |  |  | F13B |
|  |  |  | S100A2 |
|  |  |  | C1S |
|  |  |  | C4BPA |
|  |  |  | SERPINA4 |
|  |  |  | HPR |
|  |  |  | ITIH3 |
|  |  |  | C1QB |
|  |  |  | KRT5 |
|  |  |  | C8G |
|  |  |  | C8A |
|  |  |  | TTR |
|  |  |  | FN1 |
|  |  |  | GSN |
|  |  |  | IGHA1 |
|  |  |  | GAPDHS |
|  |  |  | SEMG1 |
|  |  |  | S100A8 |
|  |  |  | PON1 |
|  |  |  | APOA1 |
|  |  |  | TP53 |
|  |  |  | IGHM |
|  |  |  | CCS |
|  |  |  | HBA1 |
|  |  |  | DSP |
|  |  |  | SERPINA6 |
|  |  |  | GLRA1 |
|  |  |  | S100A7 |
|  |  |  | SERPINA1 |
|  |  |  | EEF1A1 |
|  |  |  | ITIH2 |
|  |  |  | IGKV1-17 |
|  |  |  | SOD1 |
|  |  |  | APOBR |
|  |  |  | C1QC |
|  |  |  | SERPIND1 |
|  |  |  | SIVA1 |
|  |  |  | F12 |
|  |  |  | APOA4 |
|  |  |  | P4HB |
|  |  |  | KRT14 |
|  |  |  | F2 |
|  |  |  | APCS |
|  |  |  | ARG1 |
|  |  |  | CFH |
|  |  |  | IDH3A |
|  |  |  | HRNR |
|  |  |  | TAB1 |
|  |  |  | JUP |
|  |  |  | CLU |
|  |  |  | FGA |
|  |  |  | APOE |
|  |  |  | PSPH |
|  |  |  | SELENOP |
|  |  |  | SERPINA3 |
|  |  |  | ALDOA |
|  |  |  | MT1A |
|  |  |  | KRT16 |
|  |  |  | APOL1 |
|  |  |  | MGMT |
|  |  |  | PDIA3 |
|  |  |  | KRT1 |
|  |  |  | BRCC3 |
|  |  |  | AHSG |
|  |  |  | KRT10 |
|  |  |  | TPI1 |
|  |  |  | A2M |
|  |  |  | C8B |
|  |  |  | JCHAIN |
|  |  |  | C4B |
|  |  |  | C5 |
|  |  |  | TF |
|  |  |  | IGKV3-20 |
|  |  |  | UTRN |
|  |  |  | CPN2 |
|  |  |  | KLKB1 |
|  |  |  | KRT2 |
|  |  |  | HIF1A |
|  |  |  | NDUFC2 |
|  |  |  | VCAM1 |
|  |  |  | SELE |
|  |  |  | KCNJ4 |
|  |  |  | KCNJ2 |
|  |  |  | NPPB |
|  |  |  | GJA1 |
|  |  |  | VEGFA |
|  |  |  | CHRM1 |
|  |  |  | CHRM2 |
|  |  |  | CHRM4 |
|  |  |  | CHRM3 |
|  |  |  | CHRM5 |

| **Type 2 diabetes-Obesity** | | | |
| --- | --- | --- | --- |
| Type 2 diabetes drugs not contraindicated in BMI >30 kg/m2 | BMI >30 kg/m2 drugs not contraindicated in type 2 diabetes | Type 2 diabetes drugs contraindicated in BMI >30 kg/m2 | BMI >30 kg/m2 drugs contraindicated in type 2 diabetes |
| MGAM | SLC18A2 | ABCC8 | SLC6A2 |
| SI | ADRA2A | KCNJ1 | CHRNA3 |
| AMY2A | ADRA1A | KCNJ11 | SLC6A3 |
| GAA | SLC6A3 | GLP1R | HTR3A |
| GLP1R | HTR2C | PPARG | SLC6A4 |
| DPP4 | OPRD1 | ACSL4 | CHRNA2 |
| DRD3 | OPRM1 | RXRB | KCNH2 |
| DRD5 | OPRK1 | PPARA | HTR2C |
| ADRA1D | SIGMAR1 | RXRG | CHRNB4 |
| ADRA2B | DRD1 | RXRA | CKS1B |
| DRD1 |  | PPARD | MAOB |
| HTR2C |  | PRKAB1 | MAOA |
| HTR1D |  | ETFDH | NPY |
| HTR2A |  | GPD1 | PNLIP |
| HTR7 |  | HMGCR | LIPF |
| ADRA1A |  | ITGAL | FASN |
| HTR2B |  | HDAC2 | CARTPT |
| ADRA2C |  | AHR | ADRB1 |
| DRD4 |  | DPP4 | SLC18A2 |
| ADRA1B |  | NR1I3 | TAAR1 |
| HTR1B |  | ABCC9 | DRD2 |
| HTR1A |  | ABCB11 | ADRA1A |
| ADRA2A |  | ABCA1 |  |
| DRD2 |  | CFTR |  |
| SLC5A2 |  | TRPM4 |  |
| ABCC8 |  | CPT1A |  |
| VEGFA |  | MAOB |  |
| KCNJ8 |  | SCN1A |  |
| SLC5A6 |  | GABRA1 |  |
| LIPT1 |  | CA4 |  |
| LIAS |  | GRIK1 |  |
| GANC |  | CA2 |  |
| GANAB |  | CA1 |  |
| PPARG |  | CACNA1C |  |
| KCNJ1 |  | CACNA1E |  |
|  |  | CA3 |  |
|  |  | GCGR |  |
|  |  | GLP2R |  |
|  |  | RAMP1 |  |
|  |  | CALCR |  |
|  |  | RAMP3 |  |
|  |  | RAMP2 |  |

| **Rheumatoid arthritis-Osteoporosis** | | | |
| --- | --- | --- | --- |
| Rheumatoid arthritis drugs not contraindicated in osteoporosis | Osteoporosis drugs not contraindicated in rheumatoid arthritis | Rheumatoid arthritis drugs contraindicated in osteoporosis | Osteoporosis drugs contraindicated in rheumatoid arthritis |
| PTGS1 | ESRRB | BCL2 | SCN5A |
| PTGS2 | ESR2 | PTGS2 | SCN9A |
| PRDX5 | ESRRA | THBD | SCN10A |
| IKBKB | SHBG | CFTR | EGFR |
| ANXA1 | PTK2B | PPARG | SCN4A |
| NR3C1 | AKT1 | PTGS1 | ORM1 |
| SCN10A | NCOA2 | FABP2 | ORM2 |
| PTGER1 | NCOA1 | GP1BA | ESR1 |
| TLR9 | CYP1B1 | PPARA | ESR2 |
| HMGB1 | GPER1 | S100A7 | MT-ATP6 |
| ACE2 | NR1I2 | NR3C1 | GPER1 |
| GSTM1 | ESR1 | ANXA1 | NR1I2 |
| TNF | TOP2A | NR0B1 | BECN1 |
| GSTA2 | CTPS1 | NOS2 | CHRNA4 |
| MC2R | PPAT | NR1I2 | TNNC2 |
| CRH | GLUL | TRPV1 | CACNA1C |
| PPARA | PGR | PTGES3 | SPTBN1 |
| PPARG | AR | TNF | ATP2C1 |
| CXCR1 | NR3C1 | ALOX5 | TNNC1 |
| ALOX5 | SOST | PLA2G1B | CP |
| KCNQ2 |  | TBXAS1 | CALM1 |
| KCNQ3 |  | SLC7A11 | ALPP |
| PPARD |  | IKBKB | S100A8 |
| AKR1B1 |  | ACAT1 | S100A9 |
| PTGDR2 |  | CHUK | S100B |
| MAPK3 |  | HRH2 | S100A13 |
| AKR1B10 |  | ACHE | BMP4 |
| GABRA1 |  | CA2 | PDCD6 |
| GLRA1 |  | CA3 | MGP |
| TNFSF11 |  | FCGR1A | COMP |
|  |  | FCGR3A | CAST |
|  |  | FCGR2B | S100A2 |
|  |  | C1QA | PCDH19 |
|  |  | FCGR2C | AOC1 |
|  |  | FCGR2A | PTH1R |
|  |  | LTA | CALR3 |
|  |  | FCGR3B | CALM2 |
|  |  | ATP4A | CALR |
|  |  | AHR | RGN |
|  |  | FKBP1A | CHP1 |
|  |  | TNFSF11 | NUCB2 |
|  |  | PDPK1 | PEF1 |
|  |  | CDH11 | CASQ1 |
|  |  | DHODH | SRI |
|  |  | PTK2B | GCA |
|  |  | TLR7 | CANX |
|  |  | TLR9 | CALM3 |
|  |  | ACE2 | S100A6 |
|  |  | RXRA | CASR |
|  |  | RAC1 | NRXN1 |
|  |  |  | S100A16 |
|  |  |  | CASQ2 |
|  |  |  | SPARC |
|  |  |  | NUCB1 |
|  |  |  | CIB2 |
|  |  |  | CIB1 |
|  |  |  | CADPS |
|  |  |  | CAPS |
|  |  |  | FBN3 |
|  |  |  | CADPS2 |
|  |  |  | TPT1 |
|  |  |  | NCS1 |
|  |  |  | CALB2 |
|  |  |  | FBN2 |
|  |  |  | PCAP |
|  |  |  | FDPS |
|  |  |  | GGPS1 |
|  |  |  | VDR |
|  |  |  | SERPINB9 |
|  |  |  | TFF1 |

| **Chronic obstructive pulmonary disease-Heart failure** | | | |
| --- | --- | --- | --- |
| Chronic obstructive pulmonary disease drugs not contraindicated in heart failure | Heart failure drugs not contraindicated in chronic obstructive pulmonary disease | Chronic obstructive pulmonary disease drugs contraindicated in heart failure | Heart failure drugs contraindicated in chronic obstructive pulmonary disease |
| CHRM3 | BDKRB1 | ADRB2 | ADRB1 |
| CHRM5 | ACE | NR3C1 | ADRB2 |
| CHRM2 |  | ANXA1 | ACE |
| CHRM1 |  | ADRB1 | SLC12A1 |
| CHRM4 |  | ADRB3 | SLC12A2 |
| NGF |  | CHRM1 | SLC12A4 |
| ADRB2 |  | CHRM2 | SLC12A5 |
| ADRB1 |  | CHRM3 | CFTR |
| ADRB3 |  | PDE4A | MMP9 |
| TNF |  | PDE4D | MMP2 |
| KCNK3 |  | PDE4B | LTA4H |
| KCNK9 |  | PDE4C | BDKRB1 |
| ADORA2A |  | PDE3A | GPR35 |
| PDE2A |  | ADORA2B | CA2 |
| GLTP |  | HDAC2 | AOC3 |
| GLB1 |  | ADORA2A | P4HA1 |
| LGALS3 |  | ADORA1 | HIF1A |
| GLT6D1 |  | PDE5A | AGTR1 |
| HDAC2 |  | CPNE1 | AR |
| PDE3A |  | TTLL3 | NR3C2 |
| ADORA1 |  | RIC3 | CYP11B2 |
| PDE4A |  | PARP1 | NR3C1 |
|  |  | NOMO1 | PGR |
|  |  | HM13 | SHBG |
|  |  | CHRM5 | CYP17A1 |
|  |  | CHRM4 | SRD5A1 |
|  |  |  | CACNG1 |
|  |  |  | NR1I2 |
|  |  |  | PPARG |

| **Schizophrenia-Asthma** | | | |
| --- | --- | --- | --- |
| Schizophrenia not contraindicated in asthma | Schizophrenia contraindicated in asthma | Asthma drugs not contraindicated in schizophrenia | Asthma drugs contraindicated in schizophrenia |
| DRD2 | ERBB4 | IL10 | APOE |
| DRD1 | CCKBR | ADRB1 | SI |
| ADRA1A | DRD2 | CYP2D6 | PYGL |
| CHRM1 | MPHOSPH8 | CYP3A5 | CCL17 |
| DRD3 | ANKK1 | NR3C1 | CDK2 |
| EHMT2 | CYP3A5 | NFE2L2 | NFE2L2 |
| XBP1 | SLC1A1 | ADORA2B | NR5A1 |
| ATAD5 | CAMK2B | CYP3A4 | FGF2 |
| HTR2B | MTOR | PDE4B | CYP3A4 |
| ADRA1B | MCL1 | GLCCI1 | ACTC1 |
| PPARD | MTHFR | UGT1A1 | TDO2 |
| HRH1 | CYP3A4 | ADRB2 | AGTR1 |
| HTR1A | DRD1 | POLK | TYMS |
| ADRA1D | CYP2D6 | CHRM1 | DOK5 |
| HRH2 | GIPR | DRD1 | MAPK1 |
| ADRA2B | BDNF | CYP2C19 | ANXA1 |
| AR | HTR1E | HYAL2 | GSTP1 |
| HTR2A | GRIA1 | APEX1 | HIF1A |
| DRD4 | HTR6 | ANXA1 | CYSLTR1 |
| IDH1 | UGT1A5 | IL1B | PZP |
| CYP2D6 | DRD3 | PDE4A | HAS3 |
| KCNH2 | CYP2C19 | ALOX5 | PTPRC |
| HTR7 | GRIN2B | HRH1 | ABCB1 |
| HTR6 | ABCB1 | ADRA1B | CHRM3 |
| NRG3 | CYP1A1 | T | NRG1 |
| CHRM4 | RYR1 | PPARD | BAZ2B |
| NPSR1 | HTR1A | TSHB | IGFBP1 |
| CHRM3 | CYP1A2 | SERPINA6 | IFNG |
| CBX1 | TP53 | PIK3CG | TGFBR3 |
| GMNN | ADRA2C | ADRA2B | ADRB2 |
| CYP2C19 | UGT1A6 | ADRA1D | GGT1 |
| CHRM2 | ADRA2B | MPO | ERBB2 |
| CYP3A4 |  | KIAA0391 | SLC2A1 |
| HTR2C | DRD4 | CYP2C9 | TGFB1 |
| HTR1B | GRM7 | CYP2E1 | CTNNB1 |
| MPHOSPH8 | TJP1 | BGLAP | SFTPA1 |
| THPO | ADRA1A | AR | CRISPLD2 |
| HIF1A | MAPK1 | TNFRSF11B | NPPC |
| ADRA2C | USP1 | IL2RA | USP1 |
| CYP1A2 | TNF | CRHR1 | TG |
| CHRM5 | CHRM5 | PDE3A | CYP2C19 |
| KDM4A | MC4R | CYSLTR1 | CDK4 |
| HTR5A | RGS4 | CA10 | NR3C1 |
| ADRA2A | MSANTD1 | TPM3 | CYP3A5 |
| CERKL | EPM2A |  | MT1F |
| NUBPL | HTR2A | IDH1 | UBR1 |
| DRD5 | AKT1 | TNFRSF8 | CYP2D6 |
| SMAD3 | PMCH | FEN1 | BIRC5 |
| HTT | HTR7 | SLC2A4 | ADA |
| CYP2C9 | CYP2J2 | CHRM2 | LTA4H |
| CELF4 | CHRM2 | HSPB1 | TSC22D3 |
|  | SH2B1 | CSF2 | RARA |
|  | HTR1D | MAPT | PTH1R |
|  | ADRA1B | MMP12 | CYP2C9 |
|  | HTR2C | MAPKAPK2 | IRS2 |
|  | HRH1 | COL22A1 | GSTM1 |
|  | GRIK4 | ADRA2C | TJP1 |
|  | ATXN2 | CLOCK | NR1I2 |
|  | JUND | PLA2G4A | AR |
|  | HTR3A | MTOR | CYP1A2 |
|  | CBX1 | MMP2 | VDR |
|  | HRH4 | HSD17B10 | CDH17 |
|  | GHRL | ADORA1 | APOB |
|  | SLC6A4 | CYP1A2 | TPMT |
|  | GDNF | NR1I2 | S100A10 |
|  | CNR1 | ADRA2A | G6PD |
|  | ATP1A2 | NOS1 | CHRM2 |
|  | GMNN | ADRA1A | HSD17B10 |
|  | HLA-DRB5 | XDH | LTC4S |
|  | HTR2B | EHMT2 | CA10 |
|  | HLA-B | CHRM3 | ARNT |
|  | SPOPL | VDR | UGT1A1 |
|  | SRC | CCL5 | ALOX5 |
|  | IDH1 | RECQL | JUNB |
|  | CHRM3 | EDN1 | SERPINA6 |
|  | TAAR6 | HIF1A | HCG22 |
|  | GAA | G6PD | SERPINE1 |
|  | GRIN2A | DUSP1 | SOAT1 |
|  | DRD5 | PDE5A | ABCC1 |
|  | IL2 | GUCA2A | HYAL2 |
|  | CACNA1C | PRKAR2B | THRSP |
|  | FMO1 | CCL11 | BDNF |
|  | FKBP5 | PIK3CB | NFKB1 |
|  | GLP1R | CYP3A7 | MC2R |
|  | DLG4 | PTH | ABCC9 |
|  | CALY | ADORA2A | IL2RA |
|  | NPY | IFNG | GATA3 |
|  | EIF2AK4 | NOS2 | LINC00251 |
|  | SLC6A3 | CD44 | HSPA8 |
|  | CYP2C9 | MAPK10 | ITGAM |
|  | LIPA | ITGAM | LOH19CR1 |
|  | FASN | KDM4E | TYMSOS |
|  | ADRB2 | HSPA4 | HRH1 |
|  | FAAH | CRHR2 | KRT19 |
|  | LDLR | GHRL | BCHE |
|  | RABEP1 | FCER1A | NTRK1 |
|  | TNFRSF11A | CAST | ITGB2 |
|  | LEP | CD163 | CXCL10 |
|  | EHMT2 |  | SMAD2 |
|  | HSD17B10 |  | GMNN |
|  | ITIH3 |  | HTR7 |
|  | UGT1A9 |  | RELA |
|  | KDM4A |  | CTLA4 |
|  | ADRA2A |  | CDK6 |
|  | IL1RN |  | VCAM1 |
|  | AR |  | CD1A |
|  | NR4A1 |  | DPEP1 |
|  | NR1I2 |  |  |
|  | IL1A |  | BMP7 |
|  | TAC1 |  | TEAD1 |
|  | HSPA4 |  | FABP1 |
|  | MAPK14 |  | GLCCI1 |
|  | GRIN1 |  | CXCL12 |
|  | THPO |  | KAT2A |
|  | KCNH2 |  | IL5 |
|  | PIK3CG |  | CHRM1 |
|  | HRH3 |  | SDS |
|  | SLC6A2 |  | SLCO2B1 |
|  | AKAP13 |  | F9 |
|  | CYP1B1 |  | MYC |
|  | COMT |  | CALCA |
|  | ARID5B |  | TP53 |
|  | GSTM3 |  | GLS |
|  | TPMT |  | CRHR1 |
|  | HTR1B |  | MBP |
|  | BAZ2B |  | CD86 |
|  | ADRB3 |  | CARTPT |
|  | CYP2E1 |  | RPS19 |
|  | DTNBP1 |  | CYP2C8 |
|  | GCG |  | NOTCH1 |
|  | NTS |  | CHAT |
|  | SIGMAR1 |  | RB1 |
|  | CHAT |  | UGT1A3 |
|  | PLA2G1B |  | CHKA |
|  | HLA-C |  | MMP1 |
|  | HTR3E |  | MLLT3 |
|  | CYP3A43 |  | LIF |
|  | PPARD |  | SAG |
|  | CHRM4 |  | SMAD3 |
|  | ZIC4 |  | RET |
|  | PPA2 |  | BCL2 |
|  | PLEKHA6 |  | VWF |
|  | RAPGEF4 |  | CD80 |
|  | KCNJ3 |  | GSTA1 |
|  | HSPG2 |  | GALNT17 |
|  | ANPEP |  | FOLR1 |
|  | PPARG |  | LPL |
|  | ADRB1 |  | SLC2A4 |
|  | APOB |  | DROSHA |
|  | ABCB5 |  | POLB |
|  | UGT1A1 |  |  |
|  | SV2C |  |  |
|  | CAMK2G |  |  |
|  | IFNG |  |  |
|  | FMO3 |  |  |
|  | UGT1A8 |  |  |
|  | CCK |  |  |
|  | CHRM1 |  |  |
|  | PRL |  |  |
|  | MAOB |  |  |
|  | UGT1A3 |  |  |
|  | UGT1A4 |  |  |
|  | NKX6-1 |  |  |
|  | HTT |  |  |
|  | AHR |  |  |
|  | NTRK2 |  |  |
|  | DPP6 |  |  |
|  | CCL2 |  |  |
|  | NT5E |  |  |
|  | NTF3 |  |  |
|  | GNB3 |  |  |
|  | GSTM1 |  |  |
|  | UBE2N |  |  |
|  | ADA |  |  |
|  | ABCG2 |  |  |
|  | TOR1A |  |  |
|  | GRID2 |  |  |
|  | RTKN2 |  |  |
|  | PDE4D |  |  |
|  | HOMER1 |  |  |
|  | HLA-DPB1 |  |  |
|  | CHRNA7 |  |  |
|  | RGS2 |  |  |
|  | GSTT1 |  |  |
|  | TBC1D1 |  |  |
|  | UGT1A7 |  |  |
|  | POLI |  |  |
|  | GFER |  |  |
|  | SLC6A5 |  |  |
|  | GRM3 |  |  |
|  | HLA-DRB3 |  |  |
|  | MIR582 |  |  |
|  | CSF2 |  |  |
|  | UGT1A10 |  |  |
|  | RAD52 |  |  |
|  | C3 |  |  |
|  | SLC2A4 |  |  |
|  | KAT2A |  |  |

| **Schizophrenia-Rheumatoid arthritis** | | | |
| --- | --- | --- | --- |
| Schizophrenia not contraindicated in rheumatoid arthritis | Schizophrenia contraindicated in rheumatoid arthritis | Rheumatoid arthritis drugs not contraindicated in schizophrenia | Rheumatoid arthritis drugs contraindicated in schizophrenia |
| DRD2 | CCKBR | FMO3 | APOE |
| DRD1 | DRD2 | BAX | CYP2D6 |
| ADRA1A | MPHOSPH8 | TNF | CASP3 |
| ERBB4 | ANKK1 | PTGS2 | SI |
| CHRM1 | CYP3A5 | LOH19CR1 | PTGS2 |
| CAMK2B | SLC1A1 | TSHB | ALOX12 |
| MTOR | MCL1 | MTHFR | PYGL |
| DRD3 | MTHFR | KCNA1 | CCL17 |
| EHMT2 | CYP3A4 | DHODH | NOS1 |
| XBP1 | DRD1 | FCGR3B | CDK2 |
| ATAD5 | CYP2D6 | CYP1A2 | NR1I2 |
| CYP3A4 | GIPR | IL10 | NFE2L2 |
| HTR2B | BDNF | PPAT | CYP3A4 |
| ADRA1B | HTR1E | HSD17B10 | CACNA2D1 |
| PPARD | GRIA1 | CD83 | STAT3 |
| TP53 | HTR6 | AR | ATP2A1 |
| HRH1 | UGT1A5 | ANXA1 | HRH2 |
| HTR1A | DRD3 | HMGB1 | NR5A1 |
| ADRA1D | CYP2C19 | TYMSOS | CYP2C9 |
| MAPK1 | GRIN2B | AKR1B1 | FGF2 |
| USP1 | ABCB1 | IL18 | ACTC1 |
| RGS4 | CYP1A1 | CYP3A4 | TDO2 |
| HRH2 | RYR1 | PTGS1 | AGTR1 |
| ADRA2B | HTR1A | ACAT1 | TYMS |
| AR | CYP1A2 | G6PD | CA12 |
| HTR2A | ADRA2C | AOX1 | FAAH |
| DRD4 | UGT1A6 | CAPN10 | ATP4A |
| IDH1 | ADRA2B | ALOX5 | PTGS1 |
| CYP1A2 | DRD4 | GLRB | DOK5 |
| ATXN2 | GRM7 | HIF1A | PTGER4 |
| CYP2D6 | TJP1 | CYP2C9 | DDIT3 |
| KCNH2 | ADRA1A | APC | ANXA1 |
| HTR7 | TNF | TNFRSF10A | GSTP1 |
| HTR6 | CHRM5 | ABCB1 | MMP9 |
| NRG3 | MC4R | BAZ2B | CACNA1D |
| CHRM4 | MSANTD1 | NFE2L2 | PSORS1C1 |
| NPSR1 | EPM2A | TLR9 | HIF1A |
| EPM2A | HTR2A | TNFSF11 | PZP |
| MC4R | AKT1 | KDM4A | ATP2A3 |
| CYP2C19 | PMCH | MAPT | AR |
| AKT1 | HTR7 | TCF7L2 | ATP5E |
| CHRM3 | CYP2J2 | CYP2D6 | HAS3 |
| CBX1 | CHRM2 | TARDBP | PTPRC |
| GMNN | SH2B1 | BGLAP | APC |
| GLP1R | HTR1D | PLA2G6 | ABCB1 |
| CALY | ADRA1B | HTT | NRG1 |
| CHRM2 | HTR2C | BRCA1 | IGFBP1 |
| LIPA | HRH1 | TYMS | IFNG |
| HTR2C | GRIK4 | HBB | CYP2J2 |
| HTR1B | JUND | POLI | CXCL8 |
| MPHOSPH8 | HTR3A | HPGD | TRPV1 |
| THPO | CBX1 | FKBP1A | TGFBR3 |
| HIF1A | HRH4 | FTO | CACNA1G |
| ADRA2C | GHRL | POLK | CBX1 |
| CHRM5 | SLC6A4 | LIF | GGT1 |
| KDM4A | GDNF | EHMT2 | ERBB2 |
| APOB | CNR1 | ABCG2 | CYP1A2 |
| HTR5A | RGS4 | PPP3CA | SMN2 |
| ADRA2A | ATP1A2 | SCN10A | AHR |
| CERKL | GMNN | CYP3A5 | CACNB1 |
| NUBPL | TP53 | ABCC4 | SLC2A1 |
| UBE2N | HLA-DRB5 | TG | PLA2G2A |
| DRD5 | HTR2B | ACKR1 | TGFB1 |
| SMAD3 | HLA-B | DHFR | CTNNB1 |
| RABEP1 | SPOPL | PLA2G1B | SULT1A1 |
| HTT | SRC | RXRA | SFTPA1 |
| CSF2 | IDH1 | UGDH | CRISPLD2 |
| RAD52 | CHRM3 | ASS1 | NR3C1 |
| CYP2C9 | TAAR6 | TAC1 | SULT1A3 |
| SH2B1 | GAA | PLG | BAZ2B |
| CELF4 | GRIN2A | GABRG2 | NPPC |
|  | DRD5 | IL1A | CCND1 |
|  | IL2 | TSPYL1 | CYP7B1 |
|  | CACNA1C | TP53 | TG |
|  | FMO1 | TLR7 | CYP2C19 |
|  | FKBP5 | PIK3CA | CDK4 |
|  | DLG4 | SPP1 | CDKN1A |
|  | NPY | SST | MT1F |
|  | EIF2AK4 | RB1 | IL23R |
|  | SLC6A3 | APP | NOS2 |
|  | CYP2C9 | NTRK2 | HEXB |
|  | FASN | CLCNKA | UBR1 |
|  | ADRB2 | NR1I2 | G6PD |
|  | FAAH | TAT | BIRC5 |
|  | LDLR | NUDT15 | CYP2E1 |
|  | RABEP1 | ATAD5 | ADA |
|  | TNFRSF11A | RAB9A | PLA2G1B |
|  | LEP | CD34 | TSC22D3 |
|  | EHMT2 | NR3C1 | RARA |
|  | HSD17B10 | PPARA | PTH1R |
|  | ITIH3 | PMP22 | CYP2A6 |
|  | UGT1A9 | TPMT | CSF2 |
|  | KDM4A | NOTCH1 | IRS2 |
|  | ADRA2A | PNPLA3 | MPO |
|  | ATXN2 | PPARD | KDM4A |
|  | IL1RN | MMP1 | GSTM1 |
|  | AR | CRTC2 | PRL |
|  | NR4A1 | CYP2C8 | TJP1 |
|  | NR1I2 | GABRB2 | KDM4E |
|  | IL1A | NT5E | CA9 |
|  | TAC1 | BIRC5 | HSPA8 |
|  | HSPA4 | CXCL8 | CDH17 |
|  | MAPK14 | UGT1A8 | CACNA2D3 |
|  | GRIN1 | IKBKB | BCAR1 |
|  | THPO | IL3 | CYP3A5 |
|  | PIK3CG | CYP2C19 | APOB |
|  | HRH3 | CYP3A7 | TPMT |
|  | SLC6A2 | HLA-DQA1 | PTH |
|  | AKAP13 | TYMP | PIK3CA |
|  | CYP1B1 | ITPA | TNFRSF11A |
|  | COMT | UGT1A4 | RORC |
|  | ARID5B | CCL17 | S100A10 |
|  | GSTM3 | UGT2B7 | UGT1A9 |
|  | MTOR | MC2R | HPGD |
|  | TPMT | SUMO4 | PTGER1 |
|  | HTR1B | TLR3 | PDK1 |
|  | BAZ2B | ESR1 | KCNQ4 |
|  | ADRB3 | PTH | PLAT |
|  | CYP2E1 | IDH1 | HSD17B10 |
|  | DTNBP1 | GPR35 | TARDBP |
|  | GCG | GLRA1 | ARNT |
|  | NTS | DDRGK1 | CACNA2D4 |
|  | SIGMAR1 | SMN1 | UGT1A1 |
|  | CHAT | ABCC2 | JUNB |
|  | PLA2G1B | HLA-B | UGT2B4 |
|  | HLA-C | BDNF | SERPINA6 |
|  | HTR3E | GSTM1 | HCG22 |
|  | CYP3A43 | NOD2 | ATP2A2 |
|  | PPARD | PPARG | PLCG1 |
|  | CHRM4 | ALPP | SERPINE1 |
|  | ZIC4 | NRG1 | HTR4 |
|  | PPA2 | HSPA8 | SOAT1 |
|  | PLEKHA6 | LCAT | PLK1 |
|  | RAPGEF4 | MYOD1 | HYAL2 |
|  | KCNJ3 | HSD11B1 | THRSP |
|  | HSPG2 | CYP2J2 | BDNF |
|  | GLP1R | NFKB2 | NFKB1 |
|  | ANPEP | FOXP3 | SLCO1C1 |
|  | PPARG | KDM4E | CXCR1 |
|  | ADRB1 | CTLA4 | MC2R |
|  | ABCB5 | NAT1 | CACNA1B |
|  | UGT1A1 | SMN2 | BRD2 |
|  | SV2C | GPT | CACNB2 |
|  | CAMK2G | MPO | OPRM1 |
|  | IFNG | ZSCAN25 | PPARG |
|  | KCNH2 | FCGR3A | IL2RA |
|  | FMO3 | FGF6 | VIP |
|  | UGT1A8 | GABRA1 | EDN1 |
|  | CCK | POR | GATA3 |
|  | CHRM1 | MYC | LINC00251 |
|  | PRL | BCHE | IGFBP3 |
|  | MAOB | HLA-DRB1 | HSPB1 |
|  | UGT1A3 | KCNQ1 | PLA2G4A |
|  | UGT1A4 | TLR4 | UGT1A6 |
|  | NKX6-1 | KCNJ11 | HLA-DRB1 |
|  | HTT | DSE | ITGAM |
|  | AHR |  | CASP9 |
|  | NTRK2 |  | UGT2B17 |
|  | DPP6 |  | HSPA4 |
|  | CCL2 |  | LOH19CR1 |
|  | NT5E |  | UGT1A3 |
|  | NTF3 |  | TYMSOS |
|  | GNB3 |  | TNF |
|  | GSTM1 |  | PTGES |
|  | ADA |  | VHL |
|  | ABCG2 |  | KRT19 |
|  | TOR1A |  | BCHE |
|  | GRID2 |  | NTRK1 |
|  | RTKN2 |  | F8 |
|  | PDE4D |  | VDR |
|  | HOMER1 |  | AMACR |
|  | HLA-DPB1 |  | KCNQ2 |
|  | CHRNA7 |  | CACNA1F |
|  | RGS2 |  | NOS3 |
|  | GSTT1 |  | IL12B |
|  | TBC1D1 |  | CYP2C8 |
|  | UGT1A7 |  | HLA-DQB1 |
|  | POLI |  | ITGB2 |
|  | GFER |  | GHRL |
|  | SLC6A5 |  | FCGR2A |
|  | GRM3 |  | UGT1A4 |
|  | HLA-DRB3 |  | CXCL10 |
|  | MIR582 |  | ANPEP |
|  | UGT1A10 |  | CACNA1C |
|  | C3 |  | ACHE |
|  | SLC2A4 |  | TNFRSF1B |
|  | KAT2A |  | SMAD2 |
|  |  |  | GDF15 |
|  |  |  | CACNA1I |
|  |  |  | HDC |
|  |  |  | GRP |
|  |  |  | CACNB3 |
|  |  |  | HTR7 |
|  |  |  | HMOX2 |
|  |  |  | RELA |
|  |  |  | MCL1 |
|  |  |  | CTLA4 |
|  |  |  | MAPT |
|  |  |  | ALB |
|  |  |  | CDK6 |
|  |  |  | VCAM1 |
|  |  |  | CD1A |
|  |  |  | SULT2A1 |
|  |  |  | TRAF1 |
|  |  |  | KCNQ1 |
|  |  |  | DPEP1 |
|  |  |  | BMP7 |
|  |  |  | TEAD1 |
|  |  |  | FABP1 |
|  |  |  | GLCCI1 |
|  |  |  | CXCL12 |
|  |  |  | CALCA |
|  |  |  | TAC1 |
|  |  |  | STAT4 |
|  |  |  | KLRD1 |
|  |  |  | TNFRSF1A |
|  |  |  | SULT1A4 |
|  |  |  | IL5 |
|  |  |  | CDKN1B |
|  |  |  | SDS |
|  |  |  | IGF2 |
|  |  |  | UGT2B7 |
|  |  |  | F9 |
|  |  |  | VEGFA |
|  |  |  | COL18A1 |
|  |  |  | MYC |
|  |  |  | MT-CO2 |
|  |  |  | SAA1 |
|  |  |  | TP53 |
|  |  |  | CACNA1S |
|  |  |  | GLS |
|  |  |  | CRHR1 |
|  |  |  | UGT1A |
|  |  |  | CYP19A1 |
|  |  |  | MBP |
|  |  |  | FCGR3A |
|  |  |  | CD86 |
|  |  |  | CARTPT |
|  |  |  | RPS19 |
|  |  |  | UGT2B15 |
|  |  |  | NPIPB8 |
|  |  |  | CACNA2D2 |
|  |  |  | CXCR2 |
|  |  |  | KCNQ5 |
|  |  |  | BGLAP |
|  |  |  | NOTCH1 |
|  |  |  | CHAT |
|  |  |  | EHMT2 |
|  |  |  | RB1 |
|  |  |  | PDPK1 |
|  |  |  | KCNQ3 |
|  |  |  | ABL1 |
|  |  |  | SULT1E1 |
|  |  |  | CHKA |
|  |  |  | CACNA1E |
|  |  |  | MMP1 |
|  |  |  | PLAU |
|  |  |  | LIF |
|  |  |  | SAG |
|  |  |  | UGT1A10 |
|  |  |  | SMAD3 |
|  |  |  | CACNA1H |
|  |  |  | RET |
|  |  |  | IL6 |
|  |  |  | CD84 |
|  |  |  | CACNB4 |
|  |  |  | HLA-E |
|  |  |  | BCL2 |
|  |  |  | VWF |
|  |  |  | CD80 |
|  |  |  | RAPGEF4 |
|  |  |  | GSTA1 |
|  |  |  | FOLR1 |
|  |  |  | LPL |
|  |  |  | SLC2A4 |
|  |  |  | CACNA1A |
|  |  |  | IL1B |
|  |  |  | DROSHA |
|  |  |  | SMN1 |

| **Multiple sclerosis-Peroxisomal disorders** | |
| --- | --- |
| Multiple sclerosis drugs | Peroxisomal disorder drugs |
| BAX | PLA2G1B |
| TSHB | DHCR7 |
| CYP2C9 | AMACR |
| CYP2D6 | ABCB11 |
| ADORA2A-AS1 | NR1H4 |
| KCNA1 | CYP7A1 |
| PPAT | HSD3B7 |
| ATIC | CYP27A1 |
| DHFR | CES1 |
| TYMS | FECH |
| TYMSOS | AKR1D1 |
| CCND1 |  |
| AOX1 |  |
| RYR2 |  |
| POLH |  |
| MAPT |  |
| CALCA |  |
| VDR |  |
| CYP3A4 |  |
| PYGL |  |
| NFKB1 |  |
| PTPRM |  |
| FOS |  |
| CYP3A5 |  |
| TPM3 |  |
| GABBR1 |  |
| PACSIN2 |  |
| AFP |  |
| KLRD1 |  |
| NFE2L2 |  |
| ABCB1 |  |
| GGH |  |
| UGT1A7 |  |
| ENOSF1 |  |
| ABCC3 |  |
| UGT1A8 |  |
| HBB |  |
| CYP1A2 |  |
| HMGCR |  |
| SHMT1 |  |
| FOXP3 |  |
| ABCC2 |  |
| AMPD1 |  |
| DOK5 |  |
| FTO |  |
| CDKN1B |  |
| UGT1A6 |  |
| UGT1A4 |  |
| HSD17B10 |  |
| UGT1A3 |  |
| ABCC4 |  |
| FOLH1 |  |
| SLC22A9 |  |
| SLC19A1 |  |
| TP53 |  |
| ITPA |  |
| BMP7 |  |
| GSTM1 |  |
| ABCC1 |  |
| NALCN |  |
| S100A12 |  |
| NUDT15 |  |
| TNFAIP3 |  |
| SLC16A7 |  |
| ATAD5 |  |
| RB1 |  |
| NOTCH1 |  |
| ADORA2A |  |
| HGF |  |
| GSTP1 |  |
| FPGS |  |
| TPMT |  |
| SULT2A1 |  |
| SLCO1B3 |  |
| NOS1 |  |
| GCG |  |
| HLA-C |  |
| GABBR2 |  |
| KIR2DS4 |  |
| SLC22A11 |  |
| BDNF |  |
| SLCO1A2 |  |
| RYR1 |  |
| FOLR1 |  |
| ATP5E |  |
| TAT |  |
| GLS |  |
| NCOA3 |  |
| TLR4 |  |
| CYP2C19 |  |
| DHODH |  |
| PPARG |  |
| SLCO1B1 |  |
| KEAP1 |  |
| HLA-DQA1 |  |
| IDH1 |  |
| IKZF1 |  |
| HLA-E |  |
| FGFR4 |  |
| GATA3 |  |
| DROSHA |  |
| NTRK1 |  |
| PTH |  |
| SLC6A3 |  |
| MPHOSPH8 |  |
| MTRR |  |
| UGT1A9 |  |
| DDRGK1 |  |
| ADA |  |
| HLA-G |  |
| LINC00251 |  |
| SOD2 |  |
| EHMT2 |  |
| UGT1A1 |  |
| NOS3 |  |
| ARID5B |  |
| SLC46A1 |  |
| COMT |  |
| SLAMF1 |  |
| POLB |  |
| SLC22A1 |  |
| APEX1 |  |
| TAC1 |  |
| SPECC1L |  |
| ALOX5 |  |
| ICAM3 |  |
| UGT1A5 |  |
| POLI |  |
| FLT3 |  |
| SLC22A8 |  |
| UGT1A10 |  |
| NR1I2 |  |
| HLA-DRB1 |  |
| S1PR1 |  |
| ABCG2 |  |
