# Supplementary material for: Drug contraindications in comorbid diseases: a protein interactome perspective
Source: Springer Nature journal article supplement (doi:10.1007/s13721-023-00440-3), 2024-03-19
Supplement: MOESM2 [file 26880324]

## Supplementary Information

Drug Contraindications in Comorbid Diseases: a Protein Interactome Perspective

**Authors:**

Kalyani B. Karunakaran1,2*, Madhavi K. Ganapathiraju3,4*, Sanjeev Jain5,
Samir K. Brahmachari6 and N. Balakrishnan1*

**Affiliations:**

1Supercomputer Education and Research Centre, Indian Institute of Science, Bangalore, India

2Institute for the Advanced Study of Human Biology, Kyoto University, Kyoto, Japan

3Carnegie Mellon University, Doha, Qatar

4Department of Biomedical Informatics, School of Medicine, University of Pittsburgh, Pittsburgh, PA, USA

5National Institute of Mental Health and Neuro-Sciences (NIMHANS), Bangalore, India

6Academy of Scientific and Innovative Research, CSIR-4PI, Bangalore, India

***Correspondence to:** Kalyani B. Karunakaran ([kalyanithepebble@gmail.com](mailto:kalyanithepebble@gmail.com)), Madhavi K. Ganapathiraju ([madhavi@pitt.edu](file:///D:\Users\ekaru\Documents\NBK-2020-2022-5\Drug%20contraindications%20in%20comorbidities\Results\Internal%20Revision\NetMAHIB\madhavi@pitt.edu)) and N. Balakrishnan ([balki@iisc.ac.in](mailto:balki@iisc.ac.in))

The manuscript is submitted to Network Modeling Analysis in Health Informatics and Bioinformatics.

This file contains:

- Supplementary Notes 1 to 7
- Supplementary Figures 1 to 18
- Supplementary Tables 1 and 2
- Supplementary References

**Supplementary Note 1**

**Enrichment ratios of comorbid and non-comorbid disease pairs**

While we observed overlaps of higher statistical significance between the networks of comorbid disease pairs compared to non-comorbid pairs, the odds ratio of enrichments remained similar (**Table 1**). This similarity could be attributed to several factors. Firstly, the selection of non-comorbid pairs could have introduced a sampling bias. Specifically, two of our non-comorbid pairs, schizophrenia-rheumatoid arthritis and schizophrenia-asthma, exhibited a specific biological characteristic, namely, inverse prevalence. Perhaps, this characteristic itself is influenced by shared biological processes and could have contributed to a considerable enrichment ratio, albeit with lower significance compared to comorbid pairs. Secondly, the heterogeneity within non-comorbid diseases could result in substantial odds ratios. For example, one subtype of disease A might show a higher enrichment ratio with disease B compared to another subtype of disease A, which is non-comorbid with B. Lastly, the availability of less comprehensive genetic data for non-comorbid pairs could lead to unexpected enrichment ratios.

**Supplementary Note 2**

**Enrichment of druggable targets in anxiety – depression networks**

We found that druggable proteins show higher enrichment for transmitter-gated channel activity compared to G protein-coupled peptide receptor (GPCR) activity, in terms of odds ratio of enrichment (**Supplementary Table 1**). The overrepresentation of a more druggable class (glutamate-gated Ca2+ channel activity) among proteins unique to the depression network (and not among the common proteins) would have altered the enrichment pattern for anxiety and depression in comparison with other the disease pairs.

**Supplementary Note 3**

**Targets of maprotiline**

Maprotiline acts an inhibitor of SLC6A2 (sodium-dependent noradrenaline transporter) and inhibits noradrenaline reuptake in the brain. Maprotiline acts as an antagonist to alpha-1 adrenergic receptors (ADRA1A, ADRA1B and ADRA1D) and alpha-2 adrenergic autoreceptors and heteroreceptors (ADRA2A, ADRA2B and ADRA2C), and enhances central noradrenergic and serotonergic functions, which have been linked to alleviation of anxiety and depression (Ressler and Nemeroff 2000). Maprotiline also acts as a weak antagonist to muscarinic acetylcholine receptors (CHRM1, CHRM2, CHRM3, CHRM4 and CHRM5); enhanced cholinergic signaling has been linked to both anxiety and depression (Mineur et al. 2013).

**Supplementary Note 4**

**Adrenal cortex in anxiety and depression**

The adrenal gland is an organ in the endocrine system that secretes the cortisol hormone, following the activation of the hypothalamic-pituitary-adrenal (HPA) axis by psychological stressors (Smith and Vale 2006). Several studies support the role of the adrenal gland as a focal point for depression. The adrenal gland exhibits a 70% increase in its volume in depressed individuals before successful anti-depressant treatment as well as in comparison with their matched controls (Rubin et al. 1995; Ulrich-Lai et al. 2006). The cortisol hormone secreted by the adrenal gland, upon stress-induced activation of the HPA axis, has been linked to depressive symptoms in humans and monkeys. Increased cortisol levels have been positively correlated with depressive behaviour in rhesus macaques (Qin et al. 2016). Enhanced cortisol secretion has been observed in depressive individuals (Gibbons and McHugh 1962), and has been proposed to (a) increase susceptibility to depression (Cosgriff et al. 1990) and (b) be correlated with the stress experienced by depressed individuals (Nemeroff 1996). Hyperactivation of the HPA axis has been noted in generalized anxiety disorder (Graeff 2007). Treatment with selective serotonin reuptake inhibitors (SSRIs) has been shown to reduce HPA hyperactivity in both depressed patients and patients with generalized anxiety disorder (Lenze et al. 2011; Jazayeri et al. 2010; Dziurkowska et al. 2013). Therefore, it is possible that anti-anxiety drugs that do not aggravate depressive symptoms target the adrenal gland, which produces the cortisol hormone, an effector or ‘endpoint’ of the HPA axis that seems to be regulated in a similar manner in depression as well as anxiety.

**Supplementary Note 5**

**Comparative transcriptomic analysis of maprotiline, MDD/GAD and adrenal cortex**

We performed comparative transcriptomic analysis of disease-associated, tissue-associated and drug-induced gene expression profiles using the BaseSpace Correlation Engine to analyse this hypothesis. BaseSpace Correlation Engine software suite is a data analysis platform that is used to study the effect of diseases and drugs on publicly available gene expression data (Kupershmidt et al. 2010). Maprotiline-induced differential gene expression (DGE) profile in PC3 cells (data from CMAP 2.0 (Subramanian et al. 2017)) was negatively correlated with the blood sample profiles of patients with major depressive disorder patients (MDD) and generalized anxiety disorder (GAD) (compared to MDD patients without GAD, as seen in the dataset GSE98793 (Leday et al. 2018)) (**Fig. 5a**). This negative correlation of maprotiline with MDD/GAD suggested that drugs administered to treat diseases often revert the expression of perturbed disease-associated genes to their normal levels (Duran-Frigola et al. 2017; Pushpakom et al. 2019). Secondly, the MDD/GAD profile was negatively correlated with the expression profile of adrenal gland cortex (**Fig. 5a**), indicating that this tissue could be critical to disease alleviation. Maprotiline-induced DGE profile was positively correlated with the profile of adrenal gland (**Fig. 5a**), indicating that maprotiline-mediated MDD/GAD alleviation may be dependent on adrenal gland, i.e. the reversal of MDD/GAD-associated expression profile induced by maprotiline could occur in the adrenal cortex.

**Supplementary Note 6**

**Biological processes underlying maprotiline, MDD/GAD and adrenal cortex expression profiles**

We identified the top-10 Gene Ontology (GO) biological processes enriched among the genes differentially expressed in (i) MDD/GAD versus maprotiline (in different directions), (ii) MDD/GAD versus adrenal cortex (in different directions) and (iii) maprotiline versus adrenal cortex (in the same direction). We then used the web-based tool called NaviGO (Wei et al. 2017) to group these 30 enriched biological processes into functionally cohesive networks based on semantic similarity measures of GO terms. Two such functional networks not only had top-scoring edges between the GO terms, but also contained terms enriched among all the three expression profiles (**Fig. 5b, c**). One network contained 4 GO terms associated with protein folding (**Fig. 5b**), and another network contained 11 GO terms representing cell cycle events (**Fig. 5c**). Interestingly, ‘protein folding’, ‘cyclin D associated events in G1’ and ‘G1 phase’ were independently retrieved among our top-10 Reactome pathways found to be nearest (in terms of Euclidean distance) to the DTN of anti-depressants that are not contraindicated in anxiety. Together, these results suggest that (a) adrenal cortex may be preferentially targeted by drugs (such as maprotiline) that produce beneficial effects in anxiety and depression, and (b) their actions may converge on protein folding and cell cycle processes.

**Supplementary Note 7**

**Spleen in rheumatoid arthritis and osteoporosis**

Spleen was detected as a tissue specific to rheumatoid arthritis. Spleen has been shown to act as a reservoir of osteoclast precursor cells, which upon resorption into bones, differentiate into osteoclasts.(Nakamichi et al. 2012) Splenomegaly (enlargement of the spleen) has been noted in 5-10% and 52% of rheumatoid arthritis patients in separate studies (based on physical examination and imaging studies respectively) (NISHIYA et al. 2000; GREEN and FROMKE 1966; Isomäki et al. 1971). Rheumatoid arthritis patients are also prone to developing spontaneous splenic ruptures (Fishman and Isenberg 1997). In our analysis, spleen was identified to be nearest (in terms of Euclidean distance) to the DTN of rheumatoid arthritis drugs that were contraindicated in osteoporosis (**Supplementary Fig. 18**). This indicated that spleen mediated opposite effects in rheumatoid arthritis and osteoporosis. Anecdotal evidence seemed to support this conjecture. Splenectomy improved rheumatoid arthritis in a patient (Khan and Kushner 1977), and inhibited attenuation of osteoporosis in a rat model (Sun et al. 2015) and fracture healing in patients (Xiao et al. 2016).

**
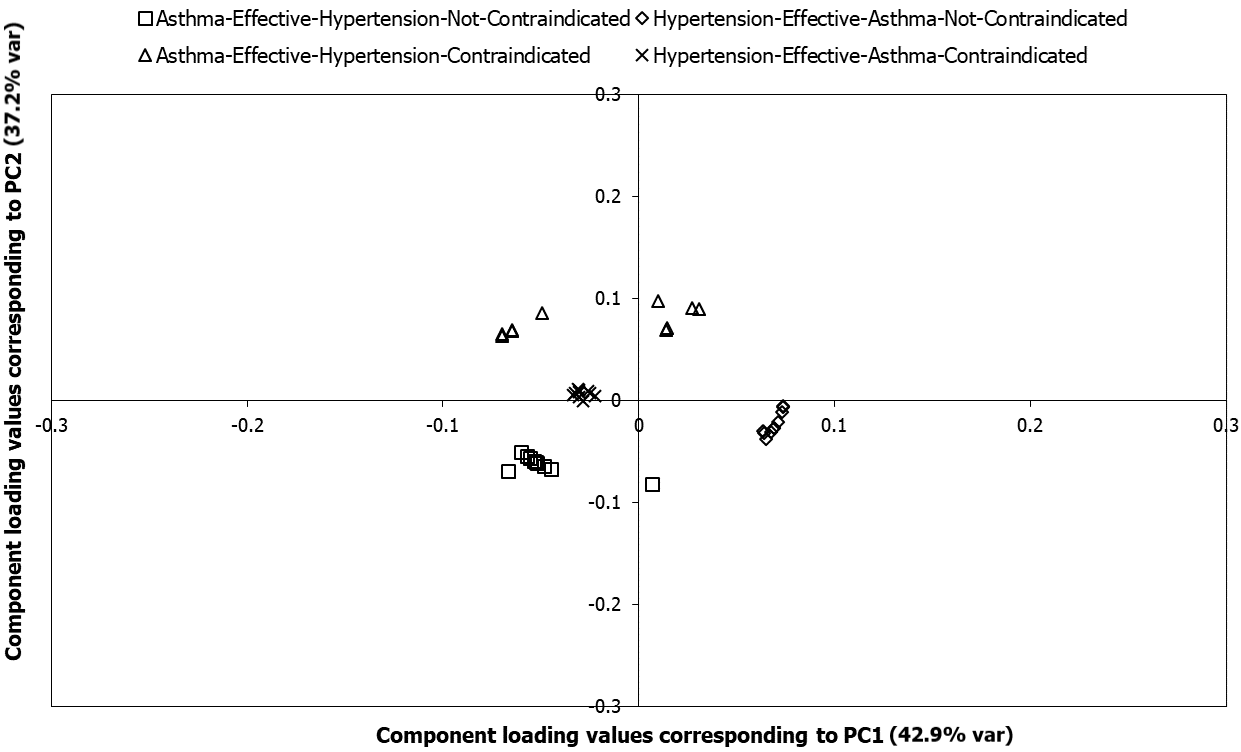
Supplementary Figure 1: Pathways associated with the target networks of asthma and hypertension drugs.** Component loading values of 378 pathways associated with the drug target networks (DTNs) of asthma and hypertension corresponding to PC1 and PC2 have been plotted along the X and Y axes respectively. PCA was performed with the *P* values of enrichment of the pathways significantly associated (*P* < 0.05) with the DTNs of asthma and hypertension. These values were transformed to –log10*P* values, which were then assembled into a data matrix containing pathways as rows and DTNs as columns. Unit variance scaling was applied across this matrix. Single value decomposition (SVD) with imputation was used to extract the principal components (PCs). The component loading values shown in the figure correspond to component scores of 4 DTNs along PC1 and PC2 that explain 42.9% and 37.2% of the total variance respectively. The top-10 pathways that appeared to be highly related to each of the 4 DTNs, which were obtained after computing the Euclidean distance between the component loading values and the component scores, are shown as square-shaped data points for the DTN of drugs effective in asthma and not contraindicated in hypertension, diamond-shaped data points for the DTN of drugs effective in hypertension and not contraindicated in asthma, triangle-shaped data points for the DTN of drugs effective in asthma and contraindicated in hypertension and cross-mark-shaped data points for the DTN of drugs effective in hypertension and contraindicated in asthma.

**
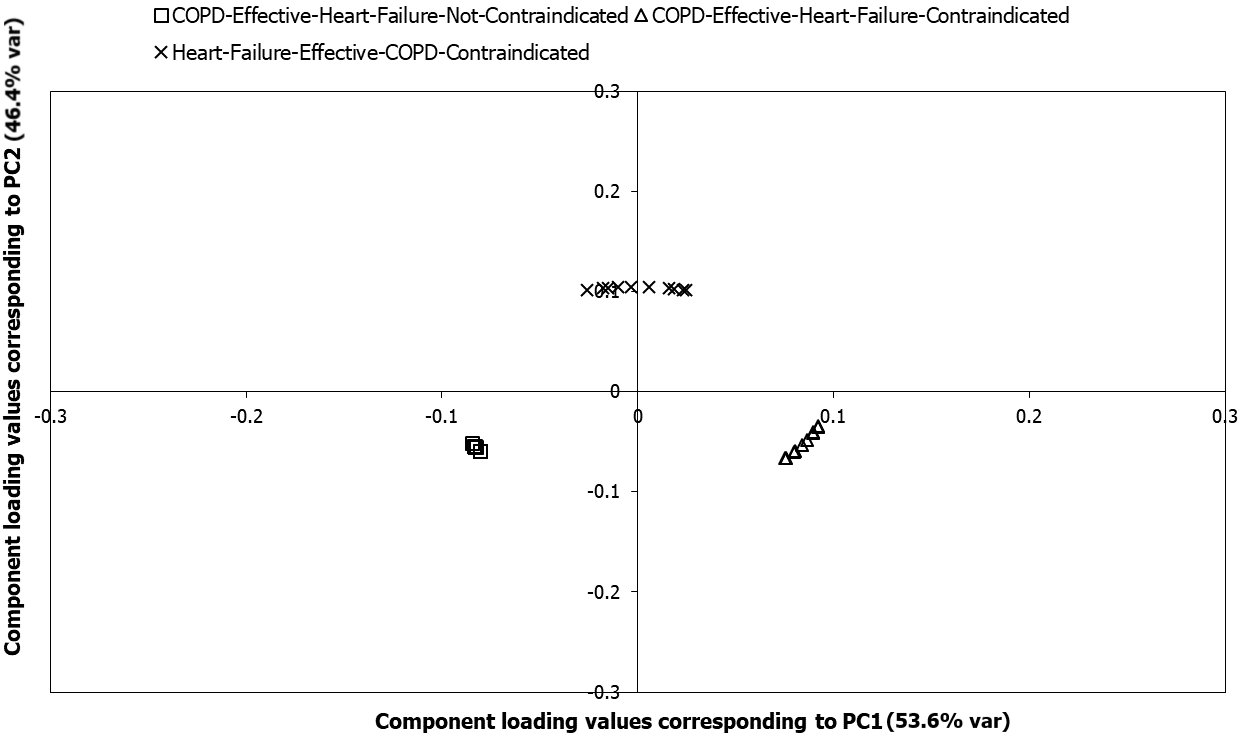
Supplementary** **Figure 2: Pathways associated with the target networks of chronic obstructive pulmonary disease and heart failure drugs.** Component loading values of 233 pathways associated with the drug target networks (DTNs) of chronic obstructive pulmonary disease (COPD) and heart failure corresponding to PC1 and PC2 have been plotted along the X and Y axes respectively. PCA was performed with the *P* values of enrichment of the pathways significantly associated (*P* < 0.05) with the DTNs of COPD and heart failure. These values were transformed to –log10*P* values, which were then assembled into a data matrix containing pathways as rows and DTNs as columns. Unit variance scaling was applied across this matrix. Single value decomposition (SVD) with imputation was used to extract the principal components (PCs). The component loading values shown in the figure correspond to component scores of 4 DTNs along PC1 and PC2 that explain 53.6% and 46.4% of the total variance respectively. The top-10 pathways that appeared to be highly related to each of the 4 DTNs, which were obtained after computing the Euclidean distance between the component loading values and the component scores, are shown as square-shaped data points for the DTN of drugs effective in COPD and not contraindicated in heart failure, diamond-shaped data points for the DTN of drugs effective in heart failure and not contraindicated in COPD, triangle-shaped data points for the DTN of drugs effective in COPD and contraindicated in heart failure and cross-mark-shaped data points for the DTN of drugs effective in heart failure and contraindicated in COPD.

**
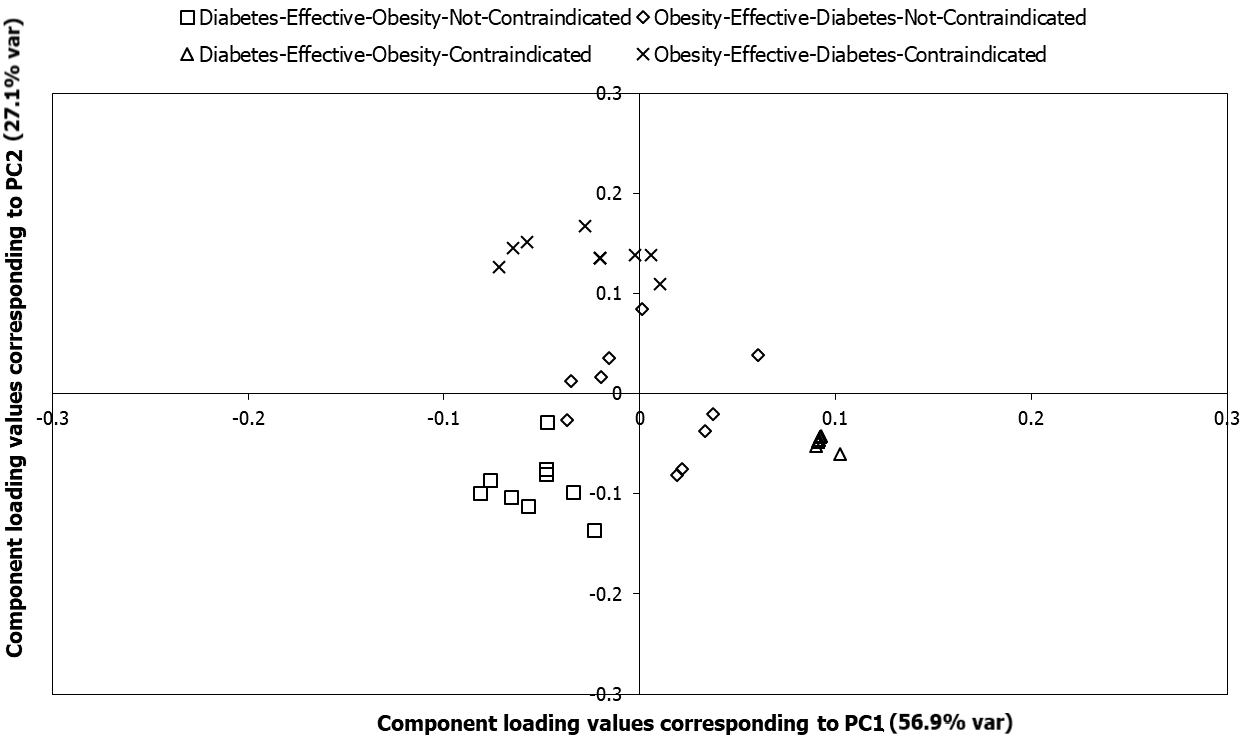
Supplementary Figure 3: Pathways associated with the target networks of type 2 diabetes and obesity drugs.** Component loading values of 270 pathways associated with the drug target networks (DTNs) of type 2 diabetes and obesity corresponding to PC1 and PC2 have been plotted along the X and Y axes respectively. PCA was performed with the *P* values of enrichment of the pathways significantly associated (*P* < 0.05) with the DTNs of type 2 diabetes and obesity. These values were transformed to –log10*P* values, which were then assembled into a data matrix containing pathways as rows and DTNs as columns. Unit variance scaling was applied across this matrix. Single value decomposition (SVD) with imputation was used to extract the principal components (PCs). The component loading values shown in the figure correspond to component scores of 4 DTNs along PC1 and PC2 that explain 56.9% and 27.1% of the total variance respectively. The top-10 pathways that appeared to be highly related to each of the 4 DTNs, which were obtained after computing the Euclidean distance between the component loading values and the component scores, are shown as square-shaped data points for the DTN of drugs effective in type 2 diabetes and not contraindicated in obesity, diamond-shaped data points for the DTN of drugs effective in obesity and not contraindicated in type 2 diabetes, triangle-shaped data points for the DTN of drugs effective in type 2 diabetes and contraindicated in obesity and cross-mark-shaped data points for the DTN of drugs effective in obesity and contraindicated in type 2 diabetes.

**
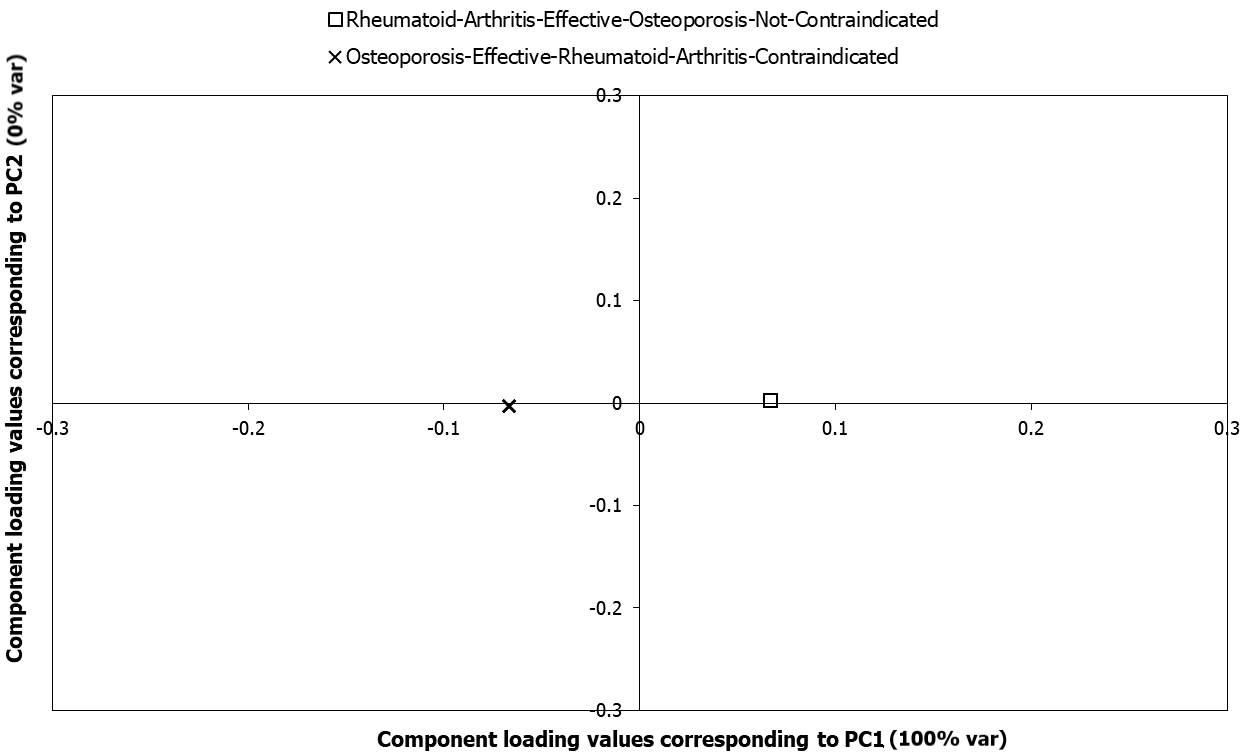
Supplementary** **Figure 4: Pathways associated with the target networks of rheumatoid arthritis and osteoporosis drugs.** Component loading values of 226 pathways associated with the drug target networks (DTNs) of rheumatoid arthritis (RA) and osteoporosis corresponding to PC1 and PC2 have been plotted along the X and Y axes respectively. PCA was performed with the *P* values of enrichment of the pathways significantly associated (*P* < 0.05) with the DTNs of RA and osteoporosis. These values were transformed to –log10*P* values, which were then assembled into a data matrix containing pathways as rows and DTNs as columns. Unit variance scaling was applied across this matrix. Single value decomposition (SVD) with imputation was used to extract the principal components (PCs). The component loading values shown in the figure correspond to component scores of 4 DTNs along PC1 and PC2 that explain 100% and 0% of the total variance respectively. The top-10 pathways that appeared to be highly related to each of the 4 DTNs, which were obtained after computing the Euclidean distance between the component loading values and the component scores, are shown as square-shaped data points for the DTN of drugs effective in RA and not contraindicated in osteoporosis, diamond-shaped data points for the DTN of drugs effective in osteoporosis and not contraindicated in RA, triangle-shaped data points for the DTN of drugs effective in RA and contraindicated in osteoporosis and cross-mark-shaped data points for the DTN of drugs effective in osteoporosis and contraindicated in RA.

**
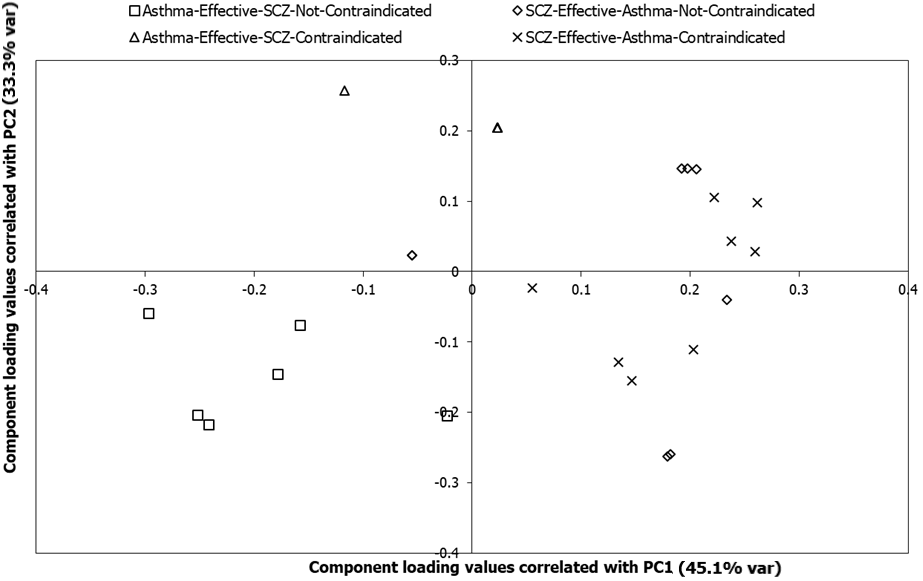
Supplementary** **Figure 5: Pathways associated with the target networks of asthma and schizophrenia drugs.** Component loading values of 35 pathways associated with the drug target networks (DTNs) of asthma and schizophrenia (SCZ) corresponding to PC1 and PC2 have been plotted along the X and Y axes respectively. PCA was performed with the *P* values of enrichment of the pathways significantly associated (*P* < 0.05) with the DTNs of asthma and SCZ. These values were transformed to –log10*P* values, which were then assembled into a data matrix containing pathways as rows and DTNs as columns. Unit variance scaling was applied across this matrix. Single value decomposition (SVD) with imputation was used to extract the principal components (PCs). The component loading values shown in the figure correspond to component scores of 4 DTNs along PC1 and PC2 that explain 45.1% and 33.3% of the total variance respectively. The top-10 pathways that appeared to be highly related to each of the 4 DTNs, which were obtained after computing the Euclidean distance between the component loading values and the component scores, are shown as square-shaped data points for the DTN of drugs effective in asthma and not contraindicated in SCZ, diamond-shaped data points for the DTN of drugs effective in SCZ and not contraindicated in asthma, triangle-shaped data points for the DTN of drugs effective in asthma and contraindicated in SCZ and cross-mark-shaped data points for the DTN of drugs effective in SCZ and contraindicated in asthma.

**Supplementary** **
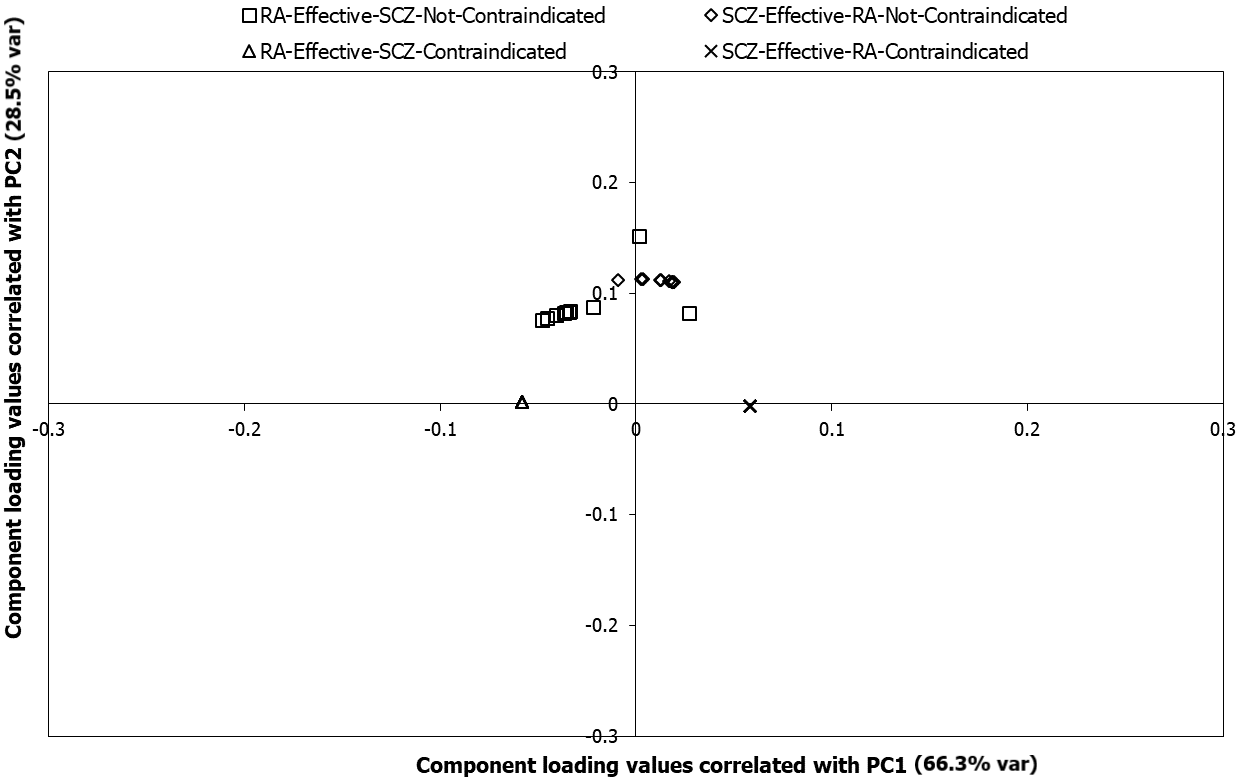
Figure 6: Pathways associated with the target networks of rheumatoid and schizophrenia drugs.** Component loading values of 303 pathways associated with the drug target networks (DTNs) of rheumatoid arthritis (RA) and schizophrenia (SCZ) corresponding to PC1 and PC2 have been plotted along the X and Y axes respectively. PCA was performed with the *P* values of enrichment of the pathways significantly associated (*P* < 0.05) with the DTNs of RA and SCZ. These values were transformed to –log10*P* values, which were then assembled into a data matrix containing pathways as rows and DTNs as columns. Unit variance scaling was applied across this matrix. Single value decomposition (SVD) with imputation was used to extract the principal components (PCs). The component loading values shown in the figure correspond to component scores of 4 DTNs along PC1 and PC2 that explain 66.3% and 28.5% of the total variance respectively. The top-10 pathways that appeared to be highly related to each of the 4 DTNs, which were obtained after computing the Euclidean distance between the component loading values and the component scores, are shown as square-shaped data points for the DTN of drugs effective in RA and not contraindicated in SCZ, diamond-shaped data points for the DTN of drugs effective in SCZ and not contraindicated in RA, triangle-shaped data points for the DTN of drugs effective in RA and contraindicated in SCZ and cross-mark-shaped data points for the DTN of drugs effective in SCZ and contraindicated in RA.

**
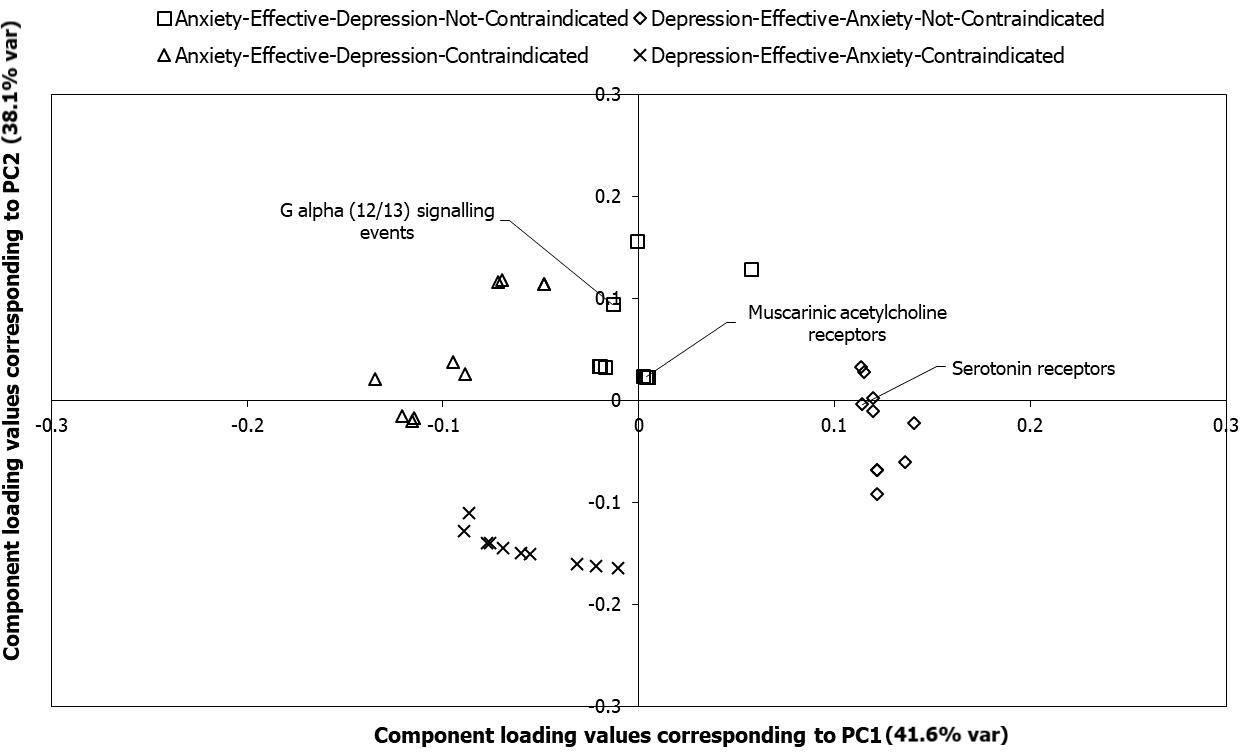
Supplementary Figure 7: Pathways associated with the target networks of anxiety and depression drugs.** The component loading values shown in the figure correspond to component scores of 4 drug target networks (DTNs) of anxiety and depression along PC1 and PC2, which explain 41.6% and 33.1% of the total variance respectively. The top-10 pathways that appeared to be highly related to each of the 4 DTNs, which were obtained after computing the Euclidean distance between the component loading values and the component scores, are shown as square-shaped data points for the DTN of drugs effective in anxiety and not contraindicated in depression, diamond-shaped data points for the DTN of drugs effective in depression and not contraindicated in anxiety, triangle-shaped data points for the DTN of drugs effective in anxiety and contraindicated in depression and cross-mark-shaped data points for the DTN of drugs effective in depression and contraindicated in anxiety. ‘G α(12/13) signaling events’ and ‘muscarinic acetylcholine receptors’ shown here are among the top-10 pathways associated with anti-anxiety drugs that are not contraindicated in depression. The drug maprotiline shown in Fig. 3 corroborates this by showing antagonistic activity on adrenergic and muscarinic acetylcholine receptors. Similarly, serotonin receptors are associated with anti-depressants that are not contraindicated in anxiety; flupentixol and mirtazapine corroborate this by showing antagnostic activity on serotonin receptors.

**
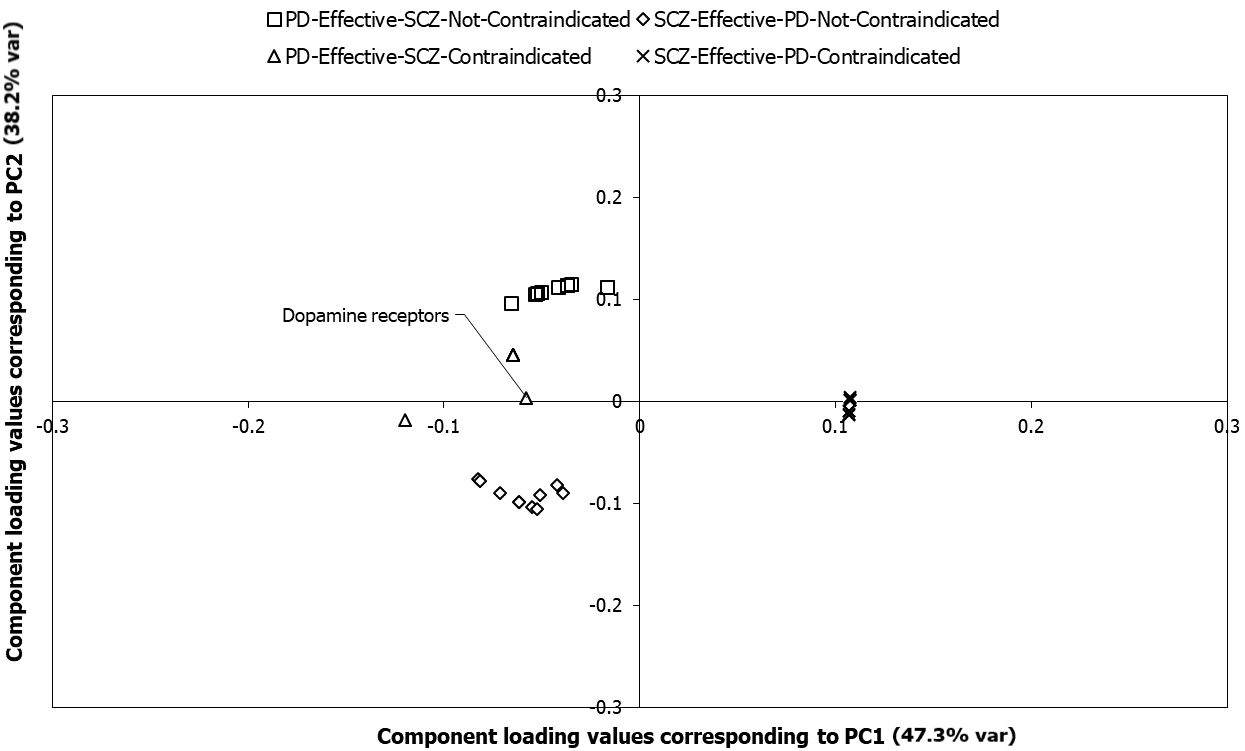
Supplementary Figure 8: Pathways associated with the target networks of Parkinson’s disease and schizophrenia drugs.** The component loading values shown in the figure correspond to component scores of 4 drug target networks (DTNs) of Parkinson’s disease (PD) and schizophrenia (SCZ) along PC1 and PC2, which explain 47.3% and 38.2% of the total variance respectively. The top-10 pathways that appeared to be highly related to each of the 4 DTNs, which were obtained after computing the Euclidean distance between the component loading values and the component scores, are shown as square-shaped data points for the DTN of drugs effective in PD and not contraindicated in SCZ, diamond-shaped data points for the DTN of drugs effective in SCZ and not contraindicated in PD, triangle-shaped data points for the DTN of drugs effective in PD and contraindicated in SCZ and cross-mark-shaped data points for the DTN of drugs effective in SCZ and contraindicated in PD. Dopamine receptors are among the top-10 pathways associated with PD drugs contraindicated in SCZ. Corroborating this, the drugs levodopa and ropinirole shown in Fig. 6 stimulate dopaminergic receptors to alleviate Parkinsonian symptoms, but at the risk of inducing a hyperdopaminergic state conducive to the SCZ development.

**
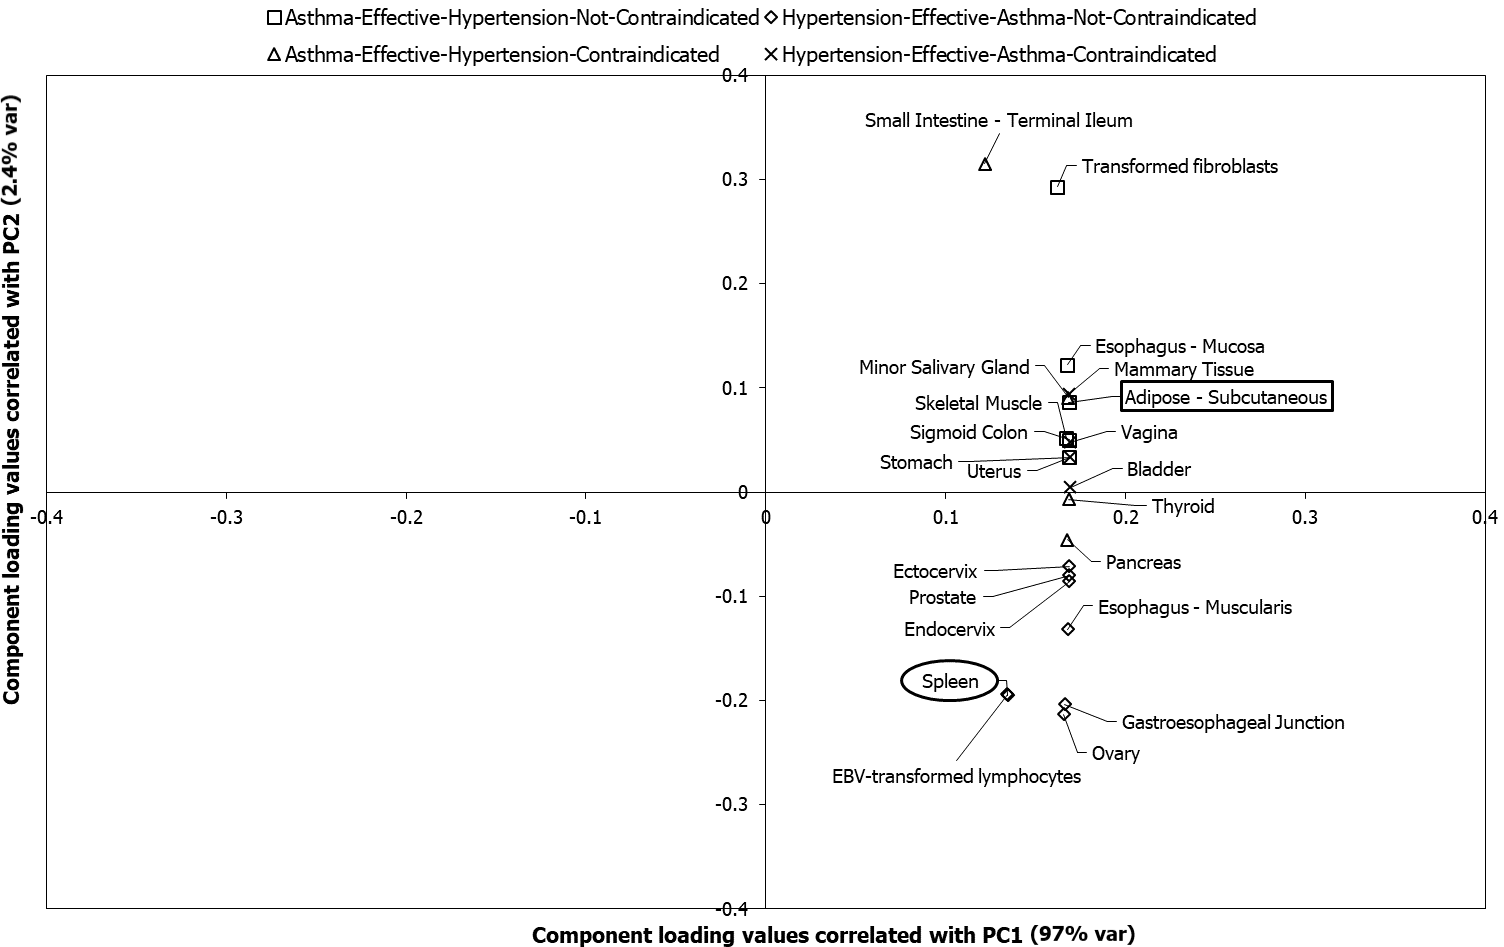
Supplementary Figure 9: Tissues associated with the target networks of asthma and hypertension drugs.** Component loading values of 38 tissues associated with the drug target networks (DTNs) of asthma and hypertension to PC1 and PC2 have been plotted along the X and Y axes respectively. PCA was performed with the *P* values of enrichment of the tissues significantly associated (*P* < 0.05) with the DTNs of asthma and hypertension. These values were transformed to –log10*P* values, which were then assembled into a data matrix containing tissues as rows and DTNs as columns. Unit variance scaling was applied across this matrix. Single value decomposition (SVD) with imputation was used to extract the principal components (PCs). The component loading values shown in the figure correspond to component scores of 4 DTNs along PC1 and PC2 that explain 97% and 2.4% of the total variance respectively. The tissues that were exclusively associated with each of the 4 DTNs among the top-ten tissues that were identified to be highly related to the DTNs, after computing the Euclidean distance between the component loading values and the component scores, are shown as square-shaped data points for the DTN of drugs effective in asthma and not contraindicated in hypertension, diamond-shaped data points for the DTN of drugs effective in hypertension and not contraindicated in asthma, triangle-shaped data points for the DTN of drugs effective in asthma and contraindicated in hypertension and cross-mark-shaped data points for the DTN of drugs effective in hypertension and contraindicated in asthma. The tissues shown in circular and rectangular boxes were also identified to be highly specific to asthma and hypertension respectively by TSEA-DB (due to a significant enrichment of asthma/hypertension-associated variants).

**
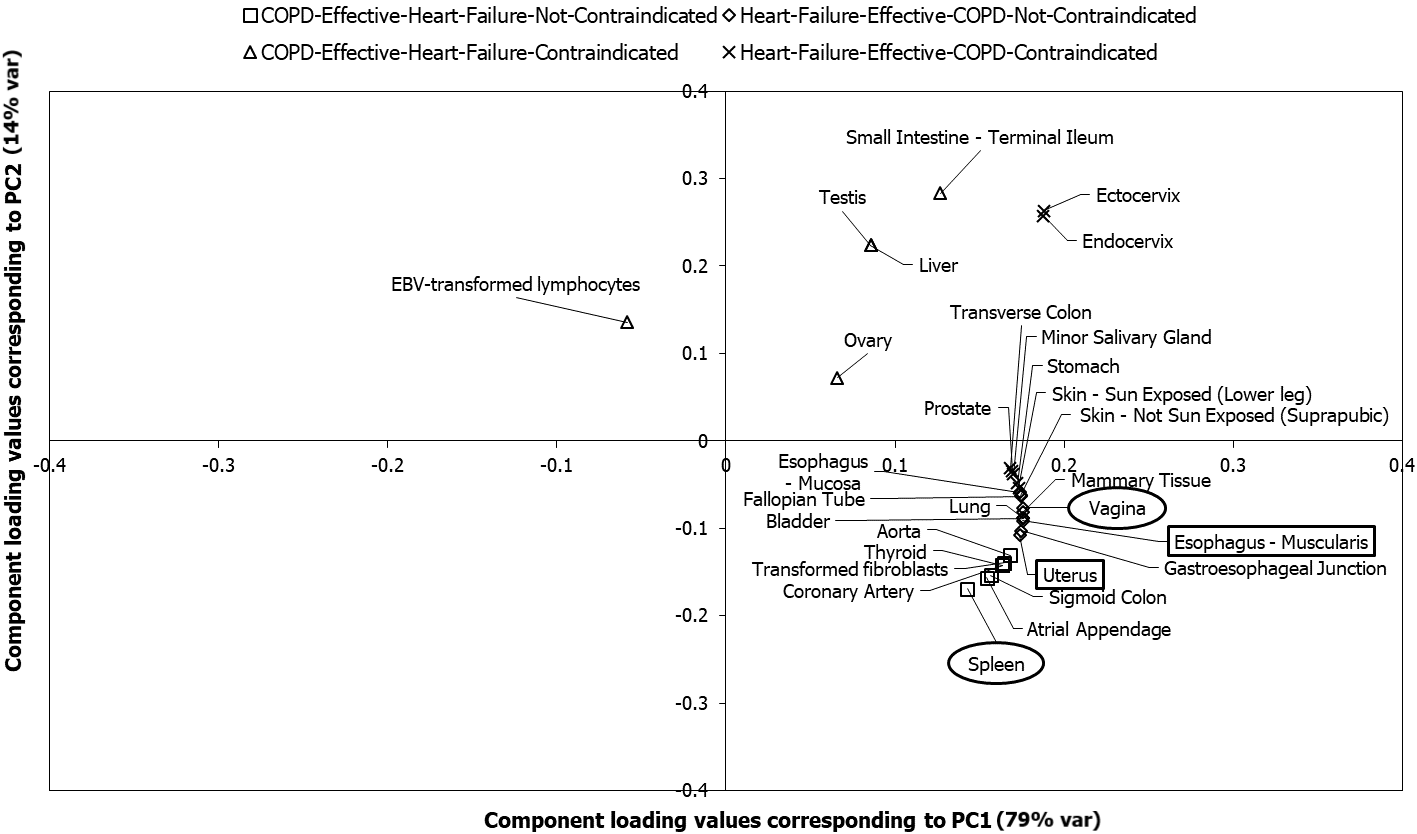
Supplementary Figure 10: Tissues associated with the target networks of chronic obstructive pulmonary disease and heart failure drugs.** Component loading values of 38 tissues associated with the drug target networks (DTNs) of chronic obstructive pulmonary disease (COPD) and heart failure to PC1 and PC2 have been plotted along the X and Y axes respectively. PCA was performed with the *P* values of enrichment of the tissues significantly associated (*P* < 0.05) with the DTNs of COPD and heart failure. These values were transformed to –log10*P* values, which were then assembled into a data matrix containing tissues as rows and DTNs as columns. Unit variance scaling was applied across this matrix. Single value decomposition (SVD) with imputation was used to extract the principal components (PCs). The component loading values shown in the figure correspond to component scores of 4 DTNs along PC1 and PC2 that explain 79% and 14% of the total variance respectively. The tissues that were exclusively associated with each of the 4 DTNs among the top-ten tissues that were identified to be highly related to the DTNs, after computing the Euclidean distance between the component loading values and the component scores, are shown as square-shaped data points for the DTN of drugs effective in COPD and not contraindicated in heart failure, diamond-shaped data points for the DTN of drugs effective in heart failure and not contraindicated in COPD, triangle-shaped data points for the DTN of drugs effective in COPD and contraindicated in heart failure and cross-mark-shaped data points for the DTN of drugs effective in heart failure and contraindicated in COPD. The tissues shown in circular and rectangular boxes were also identified to be highly specific to COPD and heart failure respectively by TSEA-DB (due to a significant enrichment of COPD/heart failure-associated variants).

**
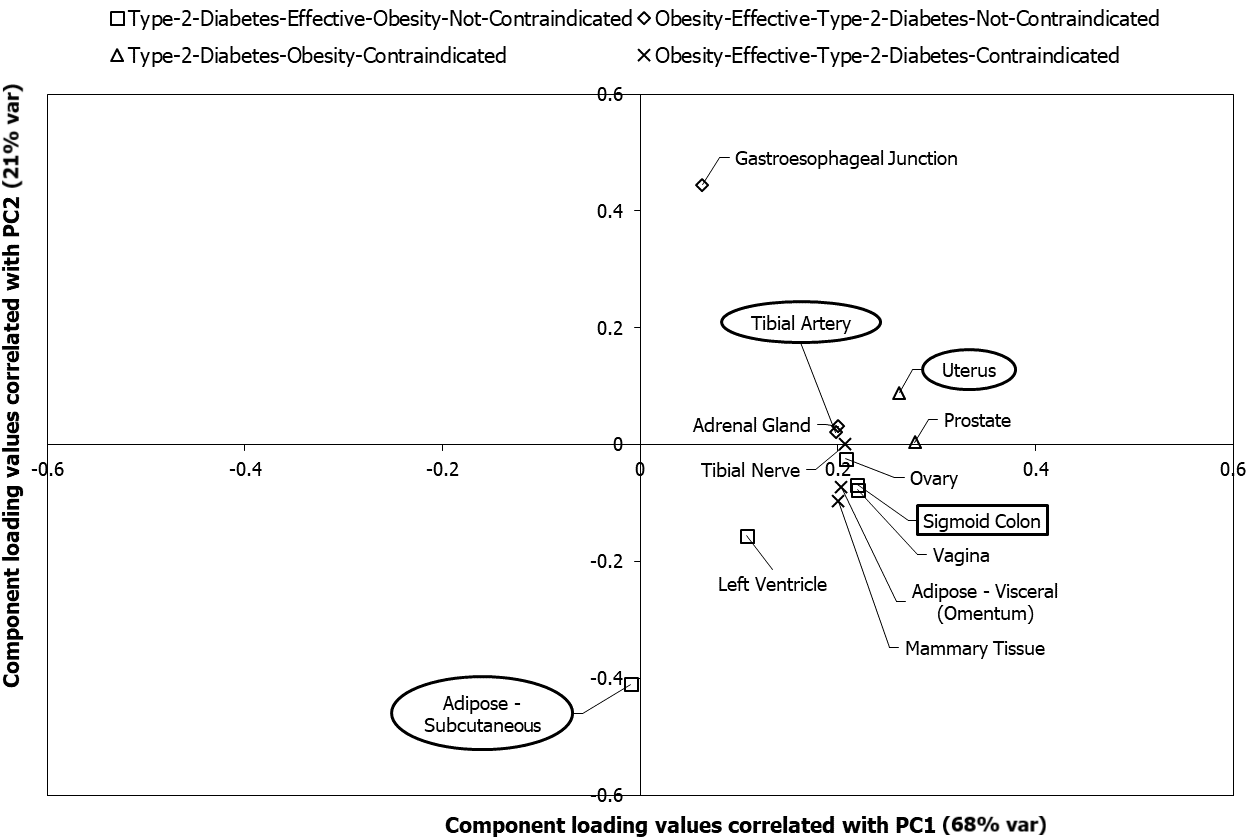
Supplementary Figure 11: Tissues associated with the target networks of type 2 diabetes and obesity drugs.** Component loading values of 26 tissues associated with the drug target networks (DTNs) of type 2 diabetes and obesity to PC1 and PC2 have been plotted along the X and Y axes respectively. PCA was performed with the *P* values of enrichment of the tissues significantly associated (*P* < 0.05) with the DTNs of type 2 diabetes and obesity. These values were transformed to –log10*P* values, which were then assembled into a data matrix containing tissues as rows and DTNs as columns. Unit variance scaling was applied across this matrix. Single value decomposition (SVD) with imputation was used to extract the principal components (PCs). The component loading values shown in the figure correspond to component scores of 4 DTNs along PC1 and PC2 that explain 68% and 21% of the total variance respectively. The tissues that were exclusively associated with each of the 4 DTNs among the top-ten tissues that were identified to be highly related to the DTNs, after computing the Euclidean distance between the component loading values and the component scores, are shown as square-shaped data points for the DTN of drugs effective in type 2 diabetes and not contraindicated in obesity, diamond-shaped data points for the DTN of drugs effective in obesity and not contraindicated in type 2 diabetes, triangle-shaped data points for the DTN of drugs effective in type 2 diabetes and contraindicated in obesity and cross-mark-shaped data points for the DTN of drugs effective in obesity and contraindicated in type 2 diabetes. The tissues shown in circular and rectangular boxes were also identified to be highly specific to type 2 diabetes and obesity respectively by TSEA-DB (due to a significant enrichment of type 2 diabetes/obesity-associated variants).

**
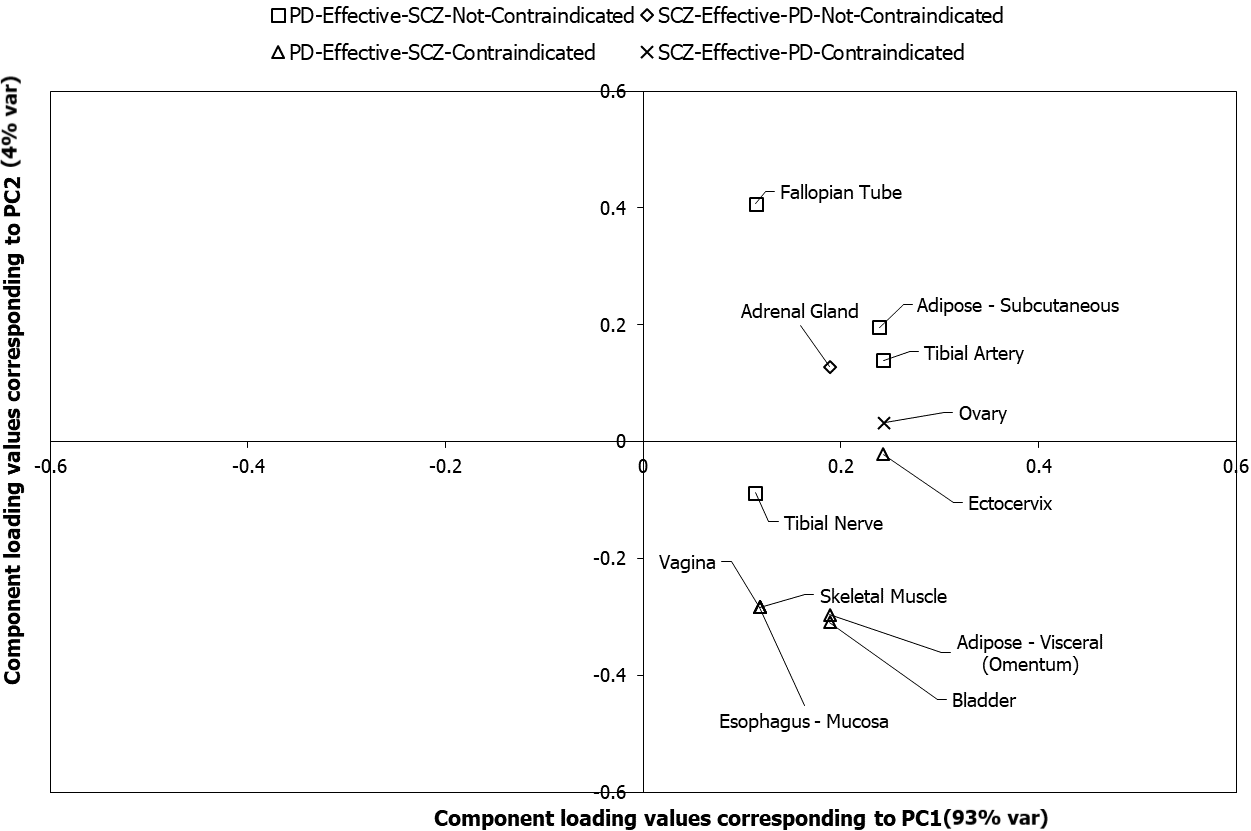
Supplementary Figure 12: Tissues associated with the target networks of Parkinson’s disease and schizophrenia drugs.** Component loading values of 24 tissues associated with the drug target networks (DTNs) of Parkinson’s disease (PD) and schizophrenia (SCZ) to PC1 and PC2 have been plotted along the X and Y axes respectively. PCA was performed with the *P* values of enrichment of the tissues significantly associated (*P* < 0.05) with the DTNs of PD and SCZ. These values were transformed to –log10*P* values, which were then assembled into a data matrix containing tissues as rows and DTNs as columns. Unit variance scaling was applied across this matrix. Single value decomposition (SVD) with imputation was used to extract the principal components (PCs). The component loading values shown in the figure correspond to component scores of 4 DTNs along PC1 and PC2 that explain 93% and 4% of the total variance respectively. The tissues that were exclusively associated with each of the 4 DTNs among the top-ten tissues that were identified to be highly related to the DTNs, after computing the Euclidean distance between the component loading values and the component scores, are shown as square-shaped data points for the DTN of drugs effective in PD and not contraindicated in SCZ, diamond-shaped data points for the DTN of drugs effective in SCZ and not contraindicated in PD, triangle-shaped data points for the DTN of drugs effective in PD and contraindicated in SCZ and cross-mark-shaped data points for the DTN of drugs effective in SCZ and contraindicated in PD. The tissues shown in circular and rectangular boxes were also identified to be highly specific to PD and SCZ respectively by TSEA-DB (due to a significant enrichment of PD/SCZ-associated variants).

**
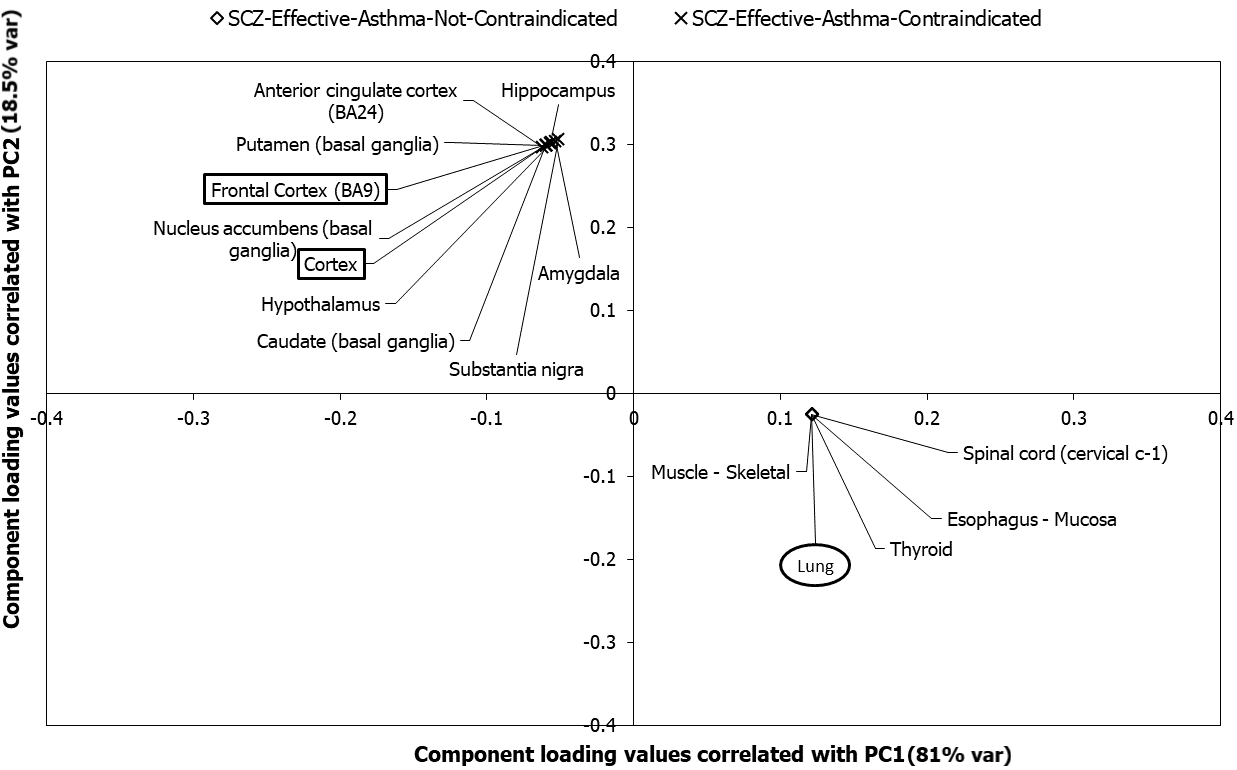
Supplementary Figure 13: Tissues associated with the target networks of asthma and schizophrenia drugs.** Component loading values of 53 tissues associated with the drug target networks (DTNs) of asthma and schizophrenia (SCZ) to PC1 and PC2 have been plotted along the X and Y axes respectively. PCA was performed with the *P* values of enrichment of the tissues significantly associated (*P* < 0.05) with the DTNs of asthma and SCZ. These values were transformed to –log10*P* values, which were then assembled into a data matrix containing tissues as rows and DTNs as columns. Unit variance scaling was applied across this matrix. Single value decomposition (SVD) with imputation was used to extract the principal components (PCs). The component loading values shown in the figure correspond to component scores of 4 DTNs along PC1 and PC2 that explain 81% and 18.5% of the total variance respectively. The tissues that were exclusively associated with each of the 4 DTNs among the top-ten tissues that were identified to be highly related to the DTNs, after computing the Euclidean distance between the component loading values and the component scores, are shown as diamond-shaped data points for the DTN of drugs effective in SCZ and not contraindicated in asthma and cross-mark-shaped data points for the DTN of drugs effective in SCZ and contraindicated in asthma. The tissues shown in circular and rectangular boxes were also identified to be highly specific to asthma and SCZ respectively by TSEA-DB (due to a significant enrichment of asthma/SCZ-associated variants).

**Supplementary Figure 1
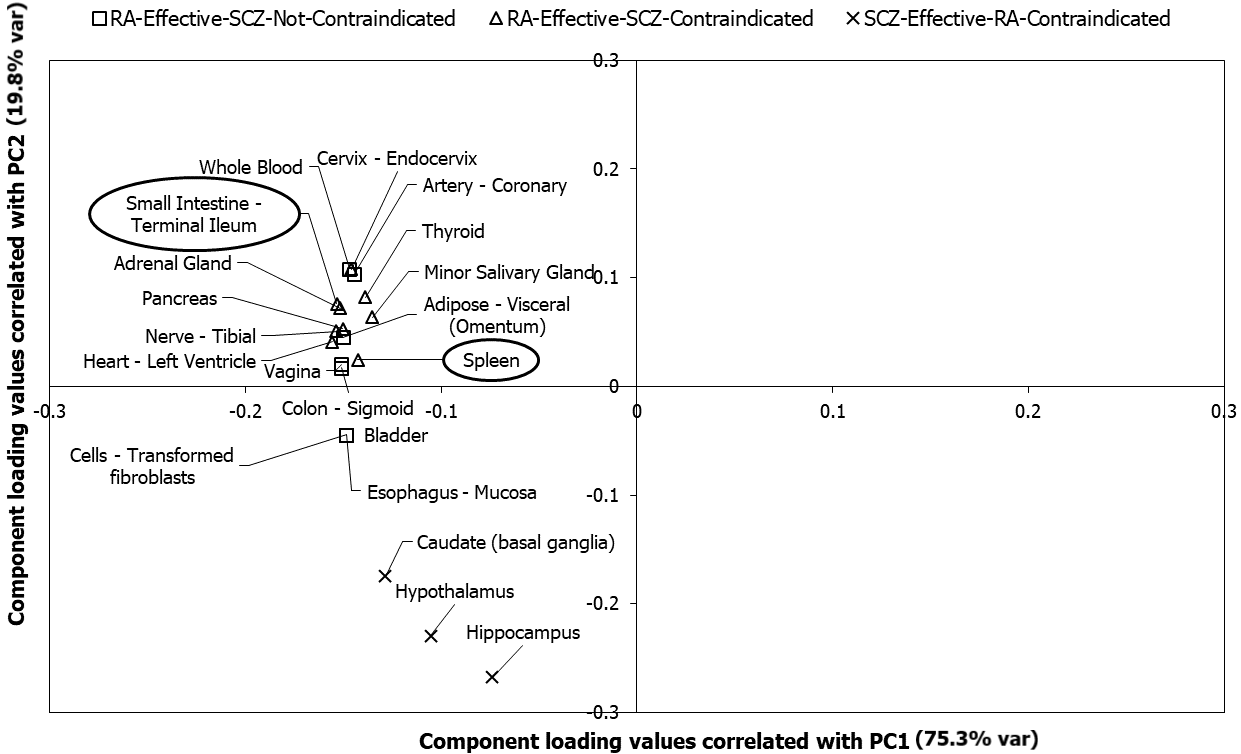
4: Tissues associated with the target networks of rheumatoid arthritis and schizophrenia drugs.** Component loading values of 53 tissues associated with the drug target networks (DTNs) of rheumatoid arthritis (RA) and schizophrenia (SCZ) to PC1 and PC2 have been plotted along the X and Y axes respectively. PCA was performed with the *P* values of enrichment of the tissues significantly associated (*P* < 0.05) with the DTNs of RA and SCZ. These values were transformed to –log10*P* values, which were then assembled into a data matrix containing tissues as rows and DTNs as columns. Unit variance scaling was applied across this matrix. Single value decomposition (SVD) with imputation was used to extract the principal components (PCs). The component loading values shown in the figure correspond to component scores of 4 DTNs along PC1 and PC2 that explain 75.3% and 19.8% of the total variance respectively. The tissues that were exclusively associated with each of the 4 DTNs among the top-ten tissues that were identified to be highly related to the DTNs, after computing the Euclidean distance between the component loading values and the component scores, are shown as square-shaped data points for the DTN of drugs effective in RA and not contraindicated in SCZ, triangle-shaped data points for the DTN of drugs effective in RA and contraindicated in SCZ and cross-mark-shaped data points for the DTN of drugs effective in SCZ and contraindicated in RA. The tissues shown in circular and rectangular boxes were also identified to be highly specific to RA and SCZ respectively by TSEA-DB (due to a significant enrichment of RA/SCZ-associated variants).


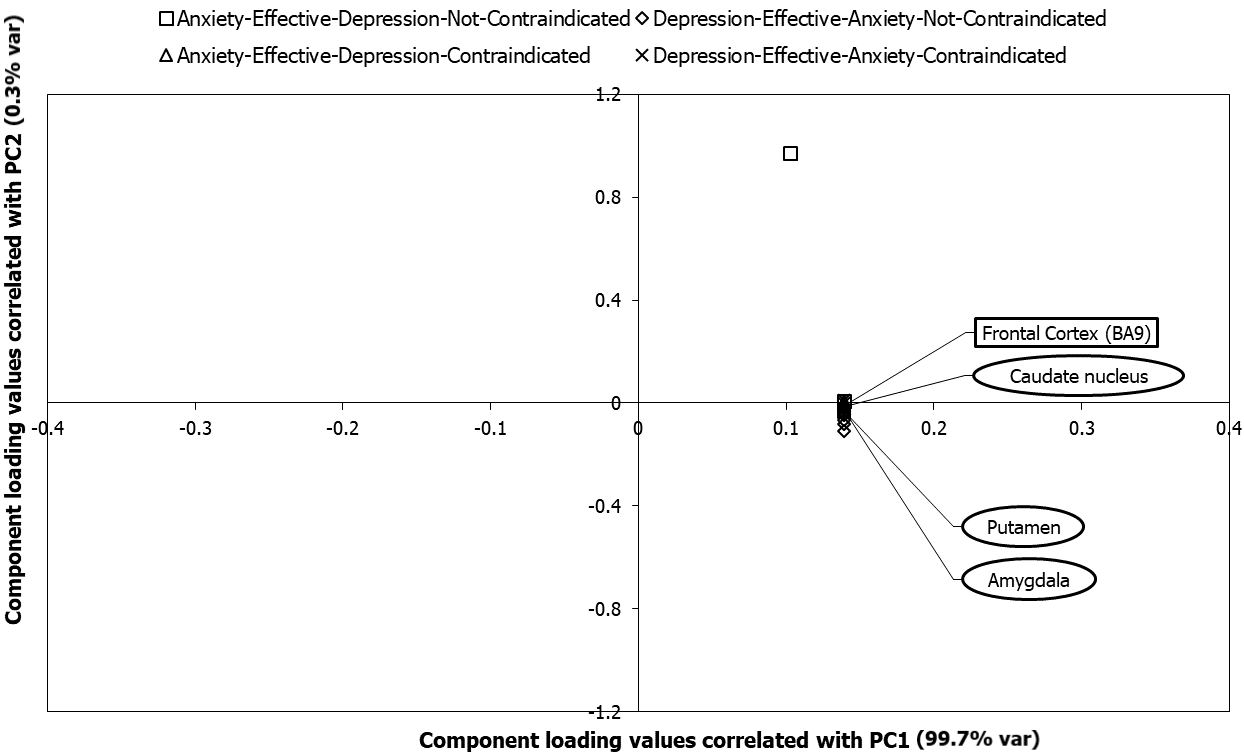
**Supplementary Figure 15: Tissues associated with the target networks of anxiety and depression drugs.** Component loading values of 52 tissues associated with the drug target networks (DTNs) of anxiety and depression corresponding to PC1 and PC2 have been plotted along the X and Y axes respectively. PCA was performed with the *P* values of enrichment of the tissues significantly associated (*P* < 0.05) with the DTNs of anxiety and depression. Note that all the genes that showed expression (transcripts per million (TPM) > 2) in the tissues were included for the enrichment analysis. The *P* values were then log-transformed and assembled into a data matrix containing tissues as rows and DTNs as columns. Unit variance scaling was applied across this matrix. Single value decomposition (SVD) with imputation was used to extract the principal components (PCs). The component loading values shown in the figure correspond to component scores of 4 DTNs along PC1 and PC2 that explain 99.7% and 0.3% of the total variance respectively. The tissues that were exclusively associated with each of the 4 DTNs among the top-ten tissues that were identified to be highly related to the DTNs, after computing the Euclidean distance between the component loading values and the component scores, are shown as square-shaped data points for the DTN of drugs effective in anxiety and not contraindicated in depression, diamond-shaped data points for the DTN of drugs effective in depression and not contraindicated in anxiety, triangle-shaped data points for the DTN of drugs effective in anxiety and contraindicated in depression and cross-mark-shaped data points for the DTN of drugs effective in depression and contraindicated in anxiety. The tissues shown in circular and rectangular boxes were also identified to be highly specific to anxiety and depression respectively by TSEA-DB (due to a significant enrichment of anxiety/depression-associated variants).

**
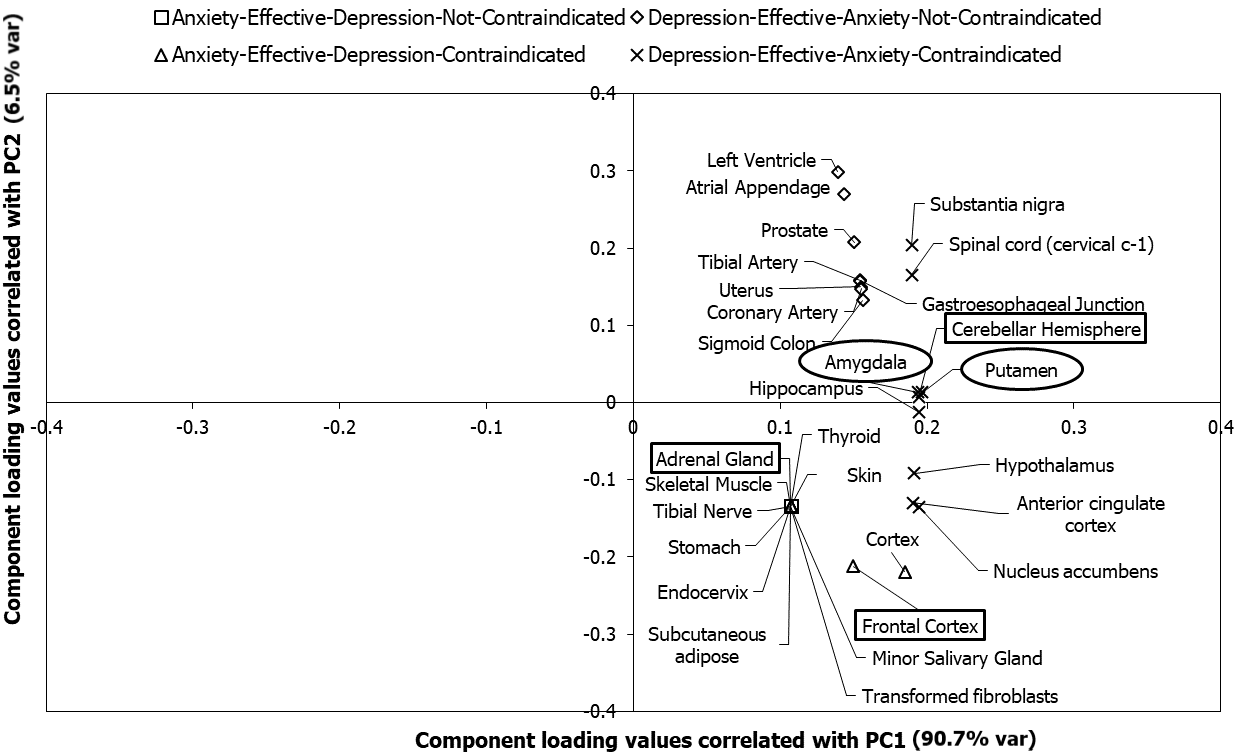
Supplementary Figure 16: Tissues associated with the target networks of anxiety and depression drugs.** The component loading values shown in the figure correspond to component scores of 4 DTNs of anxiety and depression along PC1 and PC2, which explain 90.7% and 6.5% of the total variance respectively. The tissues that were exclusively associated with each of the 4 DTNs among the top-ten tissues that were identified to be highly related to the DTNs, after computing the Euclidean distance between the component loading values and the component scores, are shown as square-shaped data points for the DTN of drugs effective in anxiety and not contraindicated in depression, diamond-shaped data points for the DTN of drugs effective in depression and not contraindicated in anxiety, triangle-shaped data points for the DTN of drugs effective in anxiety and contraindicated in depression and cross-mark-shaped data points for the DTN of drugs effective in depression and contraindicated in anxiety. The tissues shown in circular and rectangular boxes were also identified to be highly specific to anxiety and depression respectively by TSEA-DB (due to a significant enrichment of anxiety/depression-associated variants). Note that adrenal cortex, which was identified to be associated with anti-anxiety (disease A) drugs that are not contraindicated in depression (disease B), is a tissue enriched with depression (i.e. disease B) associated variants. This corroborates our finding that disease A drugs that are not contraindicated in disease B are affiliated with disease B-specific tissues.

**Supplementary Figure 17: Tissues associated with the target networks of rheumatoid arthritis and osteoporosis drugs.** Component loading values of 39 tissues associated with the drug target networks (DTNs) of rheumatoid arthritis (RA) and osteoporosis to PC1 and PC2 have been plotted along the X and Y axes respectively. PCA was performed with the *P* values of enrichment of the tissues significantly associated (*P* < 0.05) with the DTNs of RA and osteoporosis. These values were transformed to –log10*P* values, which were then assembled into a data matrix containing tissues as rows and DTNs as columns. Unit variance scaling was applied across this matrix. Single value decomposition (SVD) with imputation was used to extract the principal components (PCs). The component loading values shown in the figure correspond to component scores of 4 DTNs along PC1 and PC2 that explain 89% and 6% of the total variance respectively. The tissues that were exclusively associated with each of the 4 DTNs among the top-ten tissues that were identified to be highly related to the DTNs, after computing the Euclidean distance between the component loading values and the component scores, are shown as square-shaped data points for the DTN of drugs effective in RA and not contraindicated in osteoporosis, diamond-shaped data points for the DTN of drugs effective in osteoporosis and not contraindicated in RA, triangle-shaped data points for the DTN of drugs effective in RA and contraindicated in osteoporosis and cross-mark-shaped data points for the DTN of drugs effective in osteoporosis and contraindicated in RA. The tissues shown in circular and rectangular boxes were also identified to be highly specific to RA and osteoporosis respectively by TSEA-DB (due to a significant enrichment of RA/osteoporosis-associated variants). Note that spleen, which was identified to be associated with rheumatoid arthritis (disease A) drugs that are contraindicated in osteoporosis (disease B), is a tissue enriched with rheumatoid arthritis (i.e. disease A) associated variants. This corroborates our finding that disease A drugs that are contraindicated in disease B are affiliated with disease A-specific tissues.

**
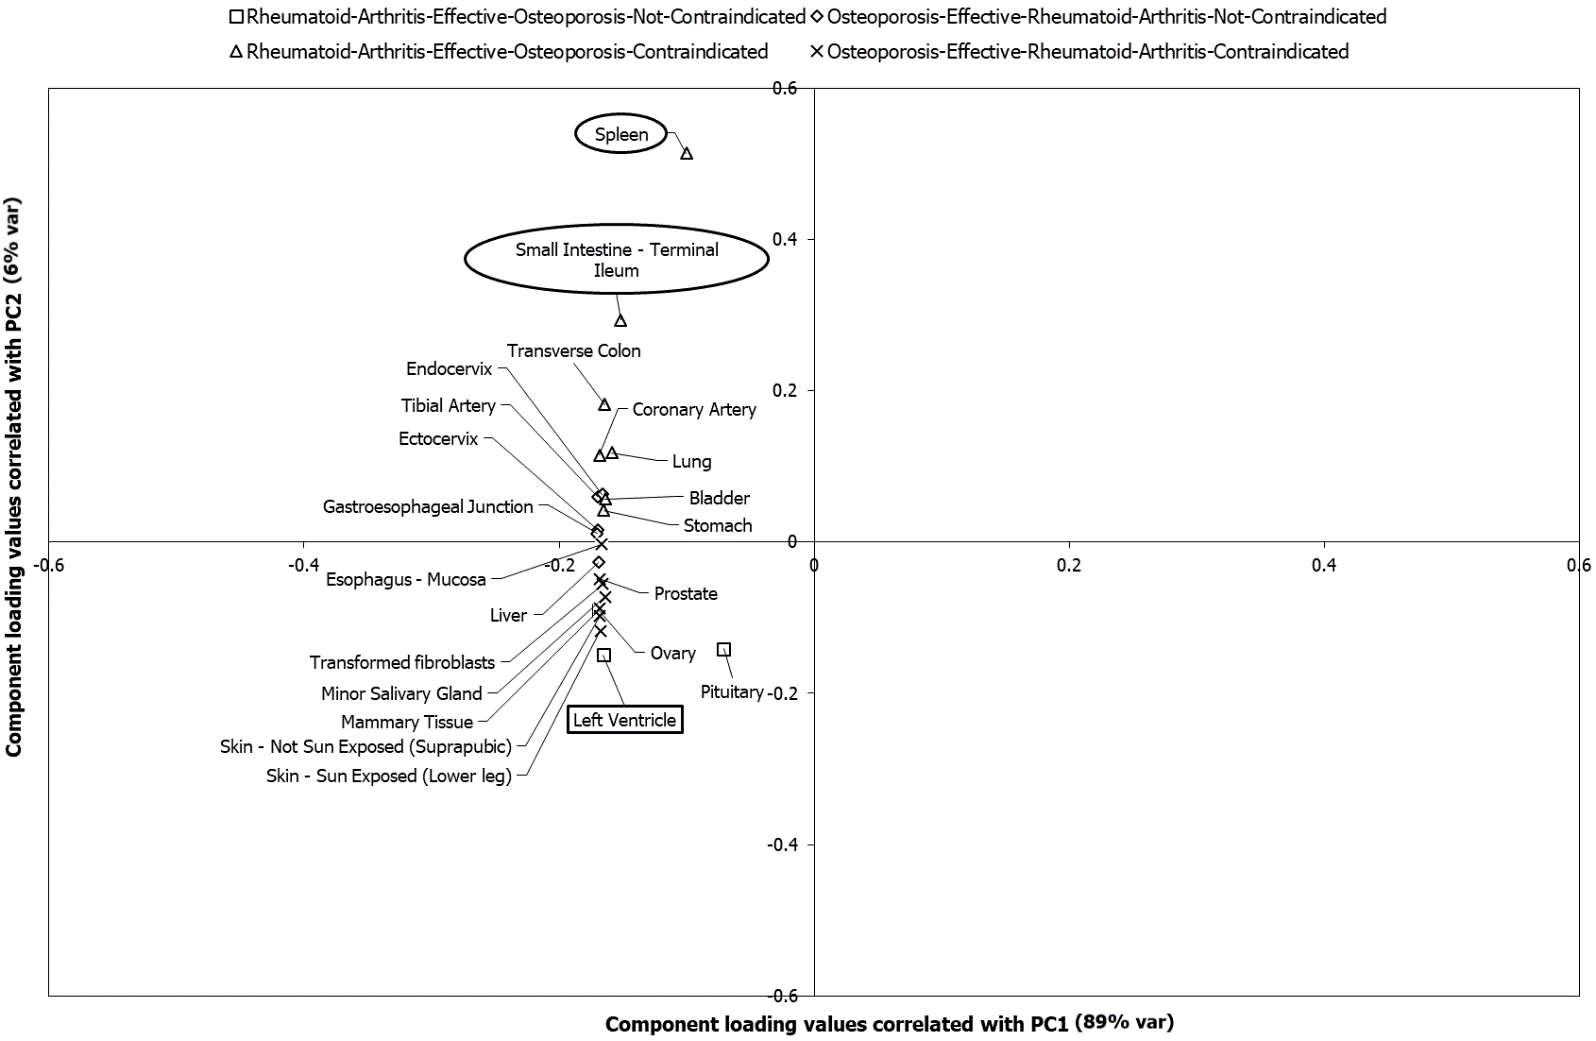
**

**
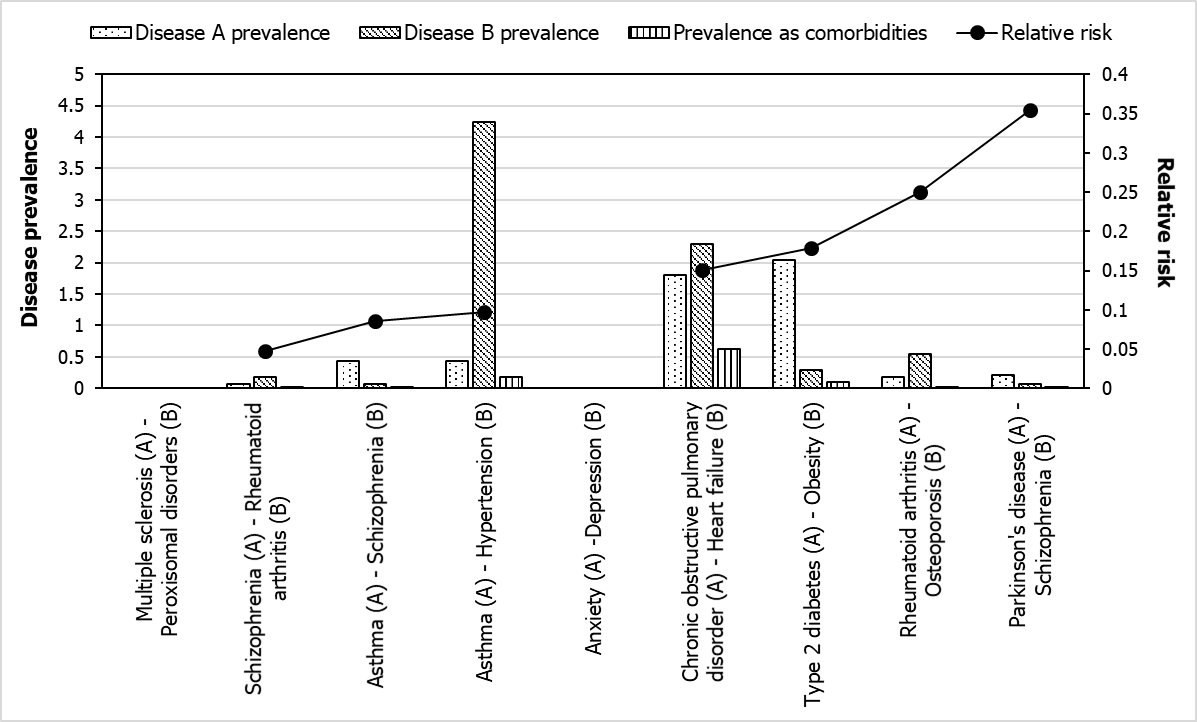
Supplementary Figure 18: Comparison of the relative risk of disease comorbidity with disease prevalence.** The graph shows the relationship of the relative risks of seven pairs of diseases (black data points) with the individual prevalence of the diseases and the prevalence of the diseases as comorbid conditions (bar graphs). The relative risks of Rheumatoid arthritis – Osteoporosis and Parkinson’s disease – Schizophrenia seem to have been overestimated due to the low prevalence of these diseases in the population.

**Supplementary Table 1: Enrichment of Gene Ontology molecular functions among druggable targets and proteins unique to the depression network.** The odds ratio of enrichment of two specific Gene Ontology molecular functions among druggable proteins, proteins unique to the depression network and proteins common to the anxiety and depression networks have been shown. *P* indicating the statistical significance of these enrichments have been shown in parentheses.

| **Protein sets**  **Gene Ontology Molecular Function** | 4463 druggable proteins – odds ratio (*P*) | Proteins common to anxiety and depression networks – odds ratio (*P*) | Proteins unique to depression network – odds ratio (*P*) |
| --- | --- | --- | --- |
| Transmitter-gated channel activity | **4.2 (< 1E-15)** | **8.65 (0.037)** | - |
| G protein-coupled peptide receptor activity | 3.8 (< 1E-15) | 3.6 (6.6E-03) | **10.46 (9.3E-07)** |

**Supplementary Table 2: Overlaps of the disease protein sets with the four classes of drug target networks.**–log10*P* values computed for each of the nine tested disease pairs using a hypergeometric test. The –log10*P* values indicate the statistical significance of the overlaps shared between each of the disease protein sets (top column headings) and the target networks of the four classes of drugs (row headings). *, ** and *** indicate low, medium and high levels of statistical significance. ⴕ, ⴕⴕ and ⴕⴕⴕ indicate non-significant overrepresentation, non-significant underrepresentation and significant underrepresentation respectively.

| **MULTIPLE SCLEROSIS (A) AND PEROXISOMAL DISORDERS** **(B)** | Common to multiple sclerosis **(A)** and peroxisomal disorders **(B)** networks | Unique to multiple sclerosis network **(A)** | Unique to peroxisomal disorders network **(B)** |
| --- | --- | --- | --- |
| DTN of drugs effective in multiple sclerosis **(A)** | 113.15** | 247.78*** | 24.52* |
| DTN of drugs effective in peroxisomal disorders **(B)** | 19.56*** | 9.78** | 1.6* |
| **RHEUMATOID ARTHRITIS (A) AND SCHIZOPHRENIA** **(B)** | Common to rheumatoid arthritis **(A)** and schizophrenia **(B)** networks | Unique to rheumatoid arthritis network **(A)** | Unique to schizophrenia network **(B)** |
| DTN of drugs effective in rheumatoid arthritis **(A)** and not contraindicated in schizophrenia **(B)** | 202.91*** | 76.56* | 82.54** |
| DTN of drugs effective in schizophrenia **(B)** and not contraindicated in rheumatoid arthritis **(A)** | 198.8*** | 17.71* | 120.54** |
| DTN of drugs effective in rheumatoid arthritis **(A)** and contraindicated in schizophrenia **(B)** | 235.72*** | 157.11** | 119.54* |
| DTN of drugs effective in schizophrenia **(B)** and contraindicated in rheumatoid arthritis **(A)** | 257.06*** | 48.54* | 207.08** |
| **SCHIZOPHRENIA (A) AND ASTHMA** **(B)** | Common to asthma **(B)** and schizophrenia **(A)** networks | Unique to asthma network **(B)** | Unique to schizophrenia network **(A)** |
| DTN of drugs effective in schizophrenia **(A)** and not contraindicated in asthma **(B)** | 0.71** | 0.75ⴕ | 1.5*** |
| DTN of drugs effective in asthma **(B)** and not contraindicated in schizophrenia **(A)** | 6.6*** | 0.99** | 0.64* |
| DTN of drugs effective in schizophrenia **(A)** and contraindicated in asthma **(B)** | 5.12** | 0.32* | 7.3*** |
| DTN of drugs effective in asthma **(B)** and contraindicated in schizophrenia **(A)** | 8.98*** | 3.2** | 0.25ⴕ |
| **ANXIETY (A) AND DEPRESSION** **(B)** | Common to anxiety **(A)** and depression **(B)** networks | Unique to anxiety network **(A)** | Unique to depression network **(B)** |
| DTN of drugs effective in anxiety **(A)** and not contradicated in depression **(B)** | 42.51*** | 0.63ⴕ | 10.51* |
| DTN of drugs effective in depression **(B)** and not contraindicated in anxiety **(A)** | 221.32*** | 0.32ⴕ | 24.98* |
| DTN of drugs effective in anxiety **(A)** and contraindicated in depression **(B)** | 70.77*** | 1.03ⴕⴕ | 20.96* |
| DTN of drugs effective in depression **(B)** and contraindicated in anxiety **(A)** | 259.82*** | 29.51** | 17.05* |
| **ASTHMA (A) AND HYPERTENSION** **(B)** | Common to asthma **(A)** and hypertension **(B)** networks | Unique to asthma network **(A)** | Unique to hypertension network **(B)** |
| DTN of drugs effective in asthma **(A)** and not contradicated in hypertension **(B)** | 385*** | 21.29** | 7.93* |
| DTN of drugs effective in hypertension **(B)** and not contraindicated in asthma **(A)** | 423*** | 3.01ⴕⴕⴕ | 6.77* |
| DTN of drugs effective in asthma **(A)** and contraindicated in hypertension **(B)** | 571*** | 30.17* | 0.45ⴕ |
| DTN of drugs effective in hypertension **(B)** and contraindicated in asthma **(A)** | 351*** | 104.14** | 58.71* |
| **CHRONIC OBSTRUCTIVE PULMONARY DISEASE (A) AND HEART FAILURE** **(B)** | Common to chronic obstructive pulmonary disease **(A)** and heart failure **(B)** networks | Unique to chronic obstructive pulmonary disease network **(A)** | Unique to heart failure network **(B)** |
| DTN of drugs effective in chronic obstructive pulmonary disease **(A)** and not contraindicated in heart failure **(B)** | 279.3*** | 17.47* | 43.59** |
| DTN of drugs effective in heart failure **(B)** and not contraindicated in chronic obstructive pulmonary disease **(A)** | 8.03*** | 0.63ⴕ | 0.67ⴕ |
| DTN of drugs effective in chronic obstructive pulmonary disease **(A)** and contraindicated in heart failure **(B)** | 255.32*** | 33.88** | 15.83* |
| DTN of drugs effective in heart failure **(B)** and contraindicated in chronic obstructive pulmonary disease **(A)** | 314*** | 8.92* | 55.19** |
| **TYPE 2 DIABETES (A) AND OBESITY** **(B)** | Common to type 2 diabetes **(A)** and obesity **(B)** networks | Unique to type 2 diabetes network **(A)** | Unique to obesity network **(B)** |
| DTN of drugs effective in diabetes **(A)** and not contraindicated in obesity **(B)** | 140.81*** | 11.69* | 1.16ⴕ |
| DTN of drugs effective in obesity **(B)** and not contraindicated in diabetes **(A)** | 18.56*** | 0.73ⴕ | 2.59* |
| DTN of drugs effective in diabetes **(A)** and contraindicated in obesity **(B)** | 232.99*** | 27.39** | 10.93* |
| DTN of drugs effective in obesity **(B)** and contraindicated in diabetes **(A)** | 54.79*** | 0.32ⴕⴕ | 21.27* |
| **RHEUMATOID ARTHRITIS (A) AND OSTEOPOROSIS** **(B)** | Common to rheumatoid arthritis **(A)** and osteoporosis **(B)** networks | Unique to rheumatoid arthritis network **(A)** | Unique to osteoporosis network **(B)** |
| DTN of drugs effective in rheumatoid arthritis **(A)** and not contradicated in osteoporosis **(B)** | 219.6*** | 17.51* | 30.9** |
| DTN of drugs effective in osteoporosis **(B)** and not contraindicated in rheumatoid arthritis **(A)** | 908* | 126.08ⴕⴕⴕ | 2118*** |
| DTN of drugs effective in rheumatoid arthritis **(A)** and contraindicated in osteoporosis **(B)** | 272.65*** | 16.29* | 68.31** |
| DTN of drugs effective in osteoporosis **(B)** and contraindicated in rheumatoid arthritis **(A)** | 255.5*** | 0.29ⴕⴕ | 237.99* |
| **PARKINSON’S DISEASE (A) AND SCHIZOPHRENIA** **(B)** | Common to Parkinson's disease **(A)** and schizophrenia **(B)** networks | Unique to Parkinson's disease network **(A)** | Unique to schizophrenia network **(B)** |
| DTN of drugs effective in Parkinson's disease **(A)** and not contradicated in schizophrenia **(B)** | 83.25*** | 15.5** | 6.6* |
| DTN of drugs effective in schizophrenia **(B)** and not contraindicated in Parkinson's disease **(A)** | 72.82*** | 15.97** | 6.73* |
| DTN of drugs effective in Parkinson's disease **(A)** and contraindicated in schizophrenia **(B)** | 25.51*** | 4.25** | 4* |
| DTN of drugs effective in schizophrenia **(B)** and contraindicated in Parkinson's disease **(A)** | 156.68*** | 103.63** | 7.87* |

**Supplementary References**

Cosgriff J, Abbott R, Oakley-Browne M, Joyce PR (1990) Cortisol hypersecretion predicts early depressive relapse after recovery with electroconvulsive therapy. Biological psychiatry

Duran-Frigola M, Mateo L, Aloy P (2017) Drug repositioning beyond the low-hanging fruits. Current Opinion in Systems Biology 3:95-102

Dziurkowska E, Wesolowski M, Dziurkowski M (2013) Salivary cortisol in women with major depressive disorder under selective serotonin reuptake inhibitors therapy. Archives of women's mental health 16 (2):139-147

Fishman D, Isenberg DA Splenic involvement in rheumatic diseases. In: Seminars in arthritis and rheumatism, 1997. vol 3. Elsevier, pp 141-155

Gibbons JL, McHugh PR (1962) Plasma cortisol in depressive illness. Journal of Psychiatric Research

Graeff FG (2007) Anxiety, panic and the hypothalamic-pituitary-adrenal axis. Brazilian Journal of Psychiatry 29:s3-s6

GREEN RA, FROMKE VL (1966) Splenectomy in Felty's syndrome. Annals of internal medicine 64 (6):1265-1270

Isomäki H, Koivisto O, Kiviniitty K (1971) Splenomegaly in rheumatoid arthritis. Acta Rheumatologica Scandinavica 17 (1-4):23-26

Jazayeri S, Keshavarz SA, Tehrani-Doost M, Djalali M, Hosseini M, Amini H, Chamari M, Djazayery A (2010) Effects of eicosapentaenoic acid and fluoxetine on plasma cortisol, serum interleukin-1beta and interleukin-6 concentrations in patients with major depressive disorder. Psychiatry Research 178 (1):112-115

Khan MA, Kushner I (1977) Improvement of rheumatoid arthritis following splenectomy for Felty syndrome. Jama 237 (11):1116-1118

Kupershmidt I, Su QJ, Grewal A, Sundaresh S, Halperin I, Flynn J, Shekar M, Wang H, Park J, Cui W (2010) Ontology-based meta-analysis of global collections of high-throughput public data. PloS one 5 (9):e13066

Leday GG, Vértes PE, Richardson S, Greene JR, Regan T, Khan S, Henderson R, Freeman TC, Pariante CM, Harrison NA (2018) Replicable and coupled changes in innate and adaptive immune gene expression in two case-control studies of blood microarrays in major depressive disorder. Biological psychiatry 83 (1):70-80

Lenze EJ, Mantella RC, Shi P, Goate AM, Nowotny P, Butters MA, Andreescu C, Thompson PA, Rollman BL (2011) Elevated cortisol in older adults with generalized anxiety disorder is reduced by treatment: a placebo-controlled evaluation of escitalopram. The American Journal of Geriatric Psychiatry 19 (5):482-490

Mineur YS, Obayemi A, Wigestrand MB, Fote GM, Calarco CA, Li AM, Picciotto MR (2013) Cholinergic signaling in the hippocampus regulates social stress resilience and anxiety-and depression-like behavior. Proceedings of the National Academy of Sciences 110 (9):3573-3578

Nakamichi Y, Mizoguchi T, Arai A, Kobayashi Y, Sato M, Penninger JM, Yasuda H, Kato S, DeLuca HF, Suda T (2012) Spleen serves as a reservoir of osteoclast precursors through vitamin D-induced IL-34 expression in osteopetrotic op/op mice. Proceedings of the National Academy of Sciences 109 (25):10006-10011

Nemeroff CB (1996) The corticotropin-releasing factor (CRF) hypothesis of depression: new findings and new directions. Mol Psychiatry 1:336-342

NISHIYA K, HISAKAWA N, HOSOKAWA T, HASHIMOTO K, DOI T (2000) Enlarged spleen detected by abdominal ultrasonography in patients with RA. Annals of the rheumatic diseases 59 (9):750-750

Pushpakom S, Iorio F, Eyers PA, Escott KJ, Hopper S, Wells A, Doig A, Guilliams T, Latimer J, McNamee C (2019) Drug repurposing: progress, challenges and recommendations. Nature Reviews Drug Discovery 18 (1):41

Qin D-d, Rizak J, Feng X-l, Yang S-c, Lü L-b, Pan L, Yin Y, Hu X-t (2016) Prolonged secretion of cortisol as a possible mechanism underlying stress and depressive behaviour. Scientific reports 6 (1):1-9

Ressler KJ, Nemeroff CB (2000) Role of serotonergic and noradrenergic systems in the pathophysiology of depression and anxiety disorders. Depression and anxiety 12 (S1):2-19

Rubin RT, Phillips JJ, Sadow TF, McCracken JT (1995) Adrenal gland volume in major depression: increase during the depressive episode and decrease with successful treatment. Archives of general psychiatry 52 (3):213-218

Smith SM, Vale WW (2006) The role of the hypothalamic-pituitary-adrenal axis in neuroendocrine responses to stress. Dialogues in clinical neuroscience 8 (4):383

Subramanian A, Narayan R, Corsello SM, Peck DD, Natoli TE, Lu X, Gould J, Davis JF, Tubelli AA, Asiedu JK (2017) A next generation connectivity map: L1000 platform and the first 1,000,000 profiles. Cell 171 (6):1437-1452. e1417

Sun D, Zheng X, Chen Y, Jia C, Xu S, Lin C, Zhang P, Zhang Z, Cai D, Jin D (2015) Enhancement of osteogenesis post‐splenectomy does not attenuate bone loss in ovariectomized rats. Journal of Orthopaedic Research 33 (9):1356-1363

Ulrich-Lai YM, Figueiredo HF, Ostrander MM, Choi DC, Engeland WC, Herman JP (2006) Chronic stress induces adrenal hyperplasia and hypertrophy in a subregion-specific manner. American journal of physiology-endocrinology and metabolism 291 (5):E965-E973

Wei Q, Khan IK, Ding Z, Yerneni S, Kihara D (2017) NaviGO: interactive tool for visualization and functional similarity and coherence analysis with gene ontology. Bmc Bioinformatics 18 (1):1-13

Xiao W-A, Wang Y, Li J-J, Yang X-X, Li Z-W, Zheng W (2016) Effect of immune function changes after splenectomy on fracture healing in patients with compound injury. Int J Clin Exp Med 9 (2):1716-1723
